# Supplementary material for: Development and Validation of the RAFFLE: A Measure of Reasons and Facilitators for Loot Box Engagement
Source: MDPI journal article supplement (doi:10.3390/jcm10245949), 2021-12-18
Supplement: s1 [file s1]

**Table S1: Order of, and rationale for, item removal during EFA**

| Step | Item                                                                                                                                                                                                                                                                                                                                                                                                                                                                                                                                                                                   | Reason for removal                                                                                                                                                                                                   |
|------|----------------------------------------------------------------------------------------------------------------------------------------------------------------------------------------------------------------------------------------------------------------------------------------------------------------------------------------------------------------------------------------------------------------------------------------------------------------------------------------------------------------------------------------------------------------------------------------|----------------------------------------------------------------------------------------------------------------------------------------------------------------------------------------------------------------------|
| 1    | 'Because I find the animations/colours/sounds exciting'                                                                                                                                                                                                                                                                                                                                                                                                                                                                                                                                | 4 cross-loadings, and no loadings above .247                                                                                                                                                                         |
| 2    | 'Because I got something unwanted in the last box'                                                                                                                                                                                                                                                                                                                                                                                                                                                                                                                                     | 2 cross-loadings, and no loadings above .293                                                                                                                                                                         |
| 3    | 'Because I got something I wanted in the last box'                                                                                                                                                                                                                                                                                                                                                                                                                                                                                                                                     | 2 cross-loadings, and no loadings above .293                                                                                                                                                                         |
| 4    | 'It's so easy because my payment details are saved'                                                                                                                                                                                                                                                                                                                                                                                                                                                                                                                                    | Lowest loading (.307)                                                                                                                                                                                                |
| 5    | 'Because streamers/pro-gamers buy them.'                                                                                                                                                                                                                                                                                                                                                                                                                                                                                                                                               | Lowest loading (.335)                                                                                                                                                                                                |
| NB   | 'For the excitement of seeing what will be inside' was flagged for removal at this point, based purely on loadings: It had the lowest loading (.349) and 2 other weak cross-loadings (<.3). However, it was retained due to expert opinion that it was a particularly vital item to be retained.                                                                                                                                                                                                                                                                                       |                                                                                                                                                                                                                      |
| 6    | 'Because I've seen a teaser / preview about what might be inside'                                                                                                                                                                                                                                                                                                                                                                                                                                                                                                                      | Lowest loading (.397).                                                                                                                                                                                               |
| 7    | 'Because there's something I want that I can only get from inside a loot box'                                                                                                                                                                                                                                                                                                                                                                                                                                                                                                          | Cross loadings (of .335 and .446) and lowest primary loading                                                                                                                                                         |
| 8    | 'To catch up with friends / others who have got ahead of me in the game'                                                                                                                                                                                                                                                                                                                                                                                                                                                                                                               | Cross loadings (of .355 and .420)                                                                                                                                                                                    |
| 9    | 'To level the playing field with others who buy loot boxes'                                                                                                                                                                                                                                                                                                                                                                                                                                                                                                                            | Cross loadings (of .434 and .305)                                                                                                                                                                                    |
| 10   | 'Because they are offering higher odds of getting something I want'                                                                                                                                                                                                                                                                                                                                                                                                                                                                                                                    | Loading <.4 (.396) and cross loads (.256) on another factor                                                                                                                                                          |
| NB   | NB Here there are multiple candidates for removal due to cross-loadings. Order of removal was decided based upon extent of the cross-loading, strength of the highest loading, and expert opinion of importance of items. 'To take my mind off the real world or my day-to-day life'; 'to cheer myself up'; and 'for the excitement of seeing what will be inside' were all candidates for removal at various points (steps 10-15) but were retained while other candidates were removed first, due to their high ratings by the expert panel and theoretical importance to the model. |                                                                                                                                                                                                                      |
| 11   | 'Because I get better value with bundles, promotions, or offers'                                                                                                                                                                                                                                                                                                                                                                                                                                                                                                                       | Cross-loading (<=.32 on 2 factors, both of which have better (>.5) loadings from other items. Also not rated highly by experts.                                                                                      |
| 12   | 'As a social activity'                                                                                                                                                                                                                                                                                                                                                                                                                                                                                                                                                                 | Cross loading (.333 and .472), and poor ratings by experts due to vagueness.                                                                                                                                         |
| 13   | 'Because I enjoy the sense of escape'                                                                                                                                                                                                                                                                                                                                                                                                                                                                                                                                                  | Cross loading on 3 factors and highest loading is now <.4. Experts rated as important, but this item is not very specific, judging by loadings; a similar item about 'taking one's mind off things' performs better. |
| 14   | 'To save time /skip the grind'                                                                                                                                                                                                                                                                                                                                                                                                                                                                                                                                                         | <.4 at this point                                                                                                                                                                                                    |
| 15   | 'To get items that will get me respect or attention ("bragging rights")'                                                                                                                                                                                                                                                                                                                                                                                                                                                                                                               | Cross loading <.3 (and <.5) on 2 factors.                                                                                                                                                                            |
| 16   | 'To cheer myself up'                                                                                                                                                                                                                                                                                                                                                                                                                                                                                                                                                                   | Cross loading >.3 (and <.5) on two factors. Due to high expert ratings, we attempted to retain this item, but it remains a poor fit throughout and there are alternative, similar items retained, so it was removed. |
