# Supplementary material for: Development and Validation of the RAFFLE: A Measure of Reasons and Facilitators for Loot Box Engagement
Source: MDPI journal article supplement (doi:10.3390/jcm10245949), 2021-12-18
Supplement: s1 [file s1]

**Table S2: Motivation Factor Structure Matrix (rotated to the direct oblimin criterion).**

| Variable                                                                    | Factor      |             |             |              |             |              |             |
|-----------------------------------------------------------------------------|-------------|-------------|-------------|--------------|-------------|--------------|-------------|
|                                                                             | 1           | 2           | 3           | 4            | 5           | 6            | 7           |
| For the excitement of seeing what will be inside                            | <b>.695</b> | .068        | .102        | -.422        | .164        | -.438        | .481        |
| To get items that I find visually appealing                                 | <b>.679</b> | -.207       | .172        | -.185        | .441        | -.362        | .246        |
| To get items that make me feel good about myself me                         | <b>.660</b> | .123        | .380        | -.353        | .262        | -.316        | .287        |
| Because I like the feeling of winning when I get something good / rare      | <b>.622</b> | .208        | .160        | -.392        | .015        | -.337        | .431        |
| To try and get something personally valuable to me                          | <b>.609</b> | .040        | .284        | -.155        | .238        | -.329        | .295        |
| Because it's fun                                                            | <b>.602</b> | .154        | .051        | -.368        | .240        | -.281        | .289        |
| To get past a hurdle or sticking point in the game                          | -.034       | <b>.804</b> | .048        | -.194        | -.094       | -.134        | -.002       |
| To get items that will be useful / give me an advantage                     | .170        | <b>.647</b> | .023        | -.173        | -.230       | -.271        | .206        |
| Because I've had a failure or defeat in the game                            | .110        | <b>.478</b> | .317        | -.298        | -.022       | -.084        | .107        |
| Because my friends encourage or pressure me to                              | .248        | .030        | <b>.664</b> | -.211        | .152        | -.104        | .351        |
| So that I don't get shamed / made fun of                                    | .118        | .119        | <b>.612</b> | -.156        | .110        | -.144        | .249        |
| Because I don't want to feel left out                                       | .269        | .137        | <b>.550</b> | -.302        | .109        | -.203        | .207        |
| Because I am bored                                                          | .230        | .163        | .141        | <b>-.667</b> | .137        | -.175        | .157        |
| Because I can't stop myself                                                 | .198        | .241        | .301        | <b>-.654</b> | -.012       | -.168        | .143        |
| Because I get an urge to open them                                          | .522        | .094        | .176        | <b>-.627</b> | .167        | -.380        | .426        |
| To take my mind of the real world or my day to day life                     | .383        | .377        | .278        | <b>-.617</b> | .231        | -.314        | .163        |
| To support good causes                                                      | .242        | .007        | .103        | -.097        | <b>.691</b> | -.232        | .179        |
| To support the developer                                                    | .208        | -.218       | .138        | -.118        | <b>.622</b> | -.113        | .052        |
| Because there is an in-game event taking place                              | .194        | .092        | .112        | -.203        | .166        | <b>-.741</b> | .145        |
| To get items that I'm collecting                                            | .426        | .237        | .138        | -.189        | .171        | <b>-.634</b> | .256        |
| Because I don't want to miss the chance to get a limited time item or offer | .421        | .180        | .133        | -.218        | .143        | <b>-.610</b> | .254        |
| To try and win items that I can make gaming currency out of                 | .274        | .150        | .266        | -.245        | .074        | -.269        | <b>.756</b> |
| To try and win items that I can make real money out of                      | .308        | -.018       | .333        | -.104        | .194        | -.117        | <b>.609</b> |
