# Supplementary material for: Development and Validation of the RAFFLE: A Measure of Reasons and Facilitators for Loot Box Engagement
Source: J Clin Med. 2021 Dec 18;10(24):5949. doi: 10.3390/jcm10245949 (PMC8707097; doi:10.3390/jcm10245949)
Supplement: Supplementary file 1 [file jcm-10-05949-s001.zip]

Archive with 4 entries (4 files):
- Table S1.pdf
- Table S2.pdf
- Table S3 Data used in Study 2.xlsx
- Table S4 Data used in Study 3.xlsx
