# Supplementary material for: Development and Validation of the RAFFLE: A Measure of Reasons and Facilitators for Loot Box Engagement
Source: J Clin Med. 2021 Dec 18;10(24):5949. doi: 10.3390/jcm10245949 (PMC8707097; doi:10.3390/jcm10245949)
Supplement: Supplementary file 1 [file jcm-10-05949-s001.zip › Table S3 Data used in Study 2.xlsx]

## Sheet: Sheet1
For the excitement of seeing what will be inside	To cheer myself up	To try and win items that I can make gaming currency out of	Because I got something unwanted in the last box	Because I get better value with bundles, promotions, or offers	Because I get an urge to open them	To get items that I’m collecting	Because I’ve seen a teaser / preview about what might be inside	It’s so easy because my payment details are saved	Because there is an in-game event taking place.	To get items that will get me respect or attention (“bragging rights”)	To get items that make me feel good about myself	Because I find the animations / colours / sounds exciting when opening loot boxes	To level the playing field with others who buy loot boxes	To catch up with friends / others who have got ahead of me in the game	Because it’s fun	To support good causes.	To get past a hurdle or sticking point in the game	To get items that I find visually appealing	To try and get something personally valuable to me	Because there’s something I want that I can only get from inside a loot box	Because my friends encourage or pressure me to	Because streamers/pro-gamers buy them.	To get items that will be useful / give me an advantage	Because I like the feeling of winning when I get something good / rare	Because I can’t stop myself	To take my mind off the real world or my day-to-day life	Because I got something I wanted in the last box	Because I’ve had a failure or defeat in the game	Because I am bored	Because I don’t want to feel left out	Because I don’t want to miss the chance to get a limited time item or offer	To support the developer	To save time /skip the grind	So that I don’t get shamed / made fun of	Because they are offering higher odds of getting something I want	As a social activity	Because I enjoy the sense of escape	To try and win items that I can make real money out of	Enhancement subscale score	Progression subscale score	Social pressure subscale score	Distraction compulsion subscale score	Altruism subscale score	Fear of missing out subscale score	Resale subscale score	TOTAL_RAFFLE_SCORE	RLI score	Monthly loot box spend
3	2	2	0	2	2	2	2	3	2	2	0	0	2	3	3	0	2	0	1	2	1	1	3	3	0	2	2	1	0	0	2	0	2	0	2	0	2	0	10	6	1	4	0	6	2	29	20	5
2	2	0	0	2	2	3	1	3	0	1	0	0	0	0	1	1	0	3	0	3	0	0	0	3	0	1	1	0	2	0	1	1	0	0	2	0	1	0	9	0	0	5	2	4	0	20	15	0
2	1	0	0	1	2	0	1	2	1	0	2	0	0	0	1	0	0	2	2	1	0	0	0	2	1	1	0	0	0	0	2	1	2	0	2	1	1	0	11	0	0	4	1	3	0	19	18	5
0	1	2	0	3	1	2	1	3	3	0	0	0	0	0	2	1	3	0	0	3	0	0	3	2	2	3	3	0	2	1	3	2	2	0	1	0	2	0	4	6	1	8	3	8	2	32	18	25
0	0	0	0	0	0	0	0	0	0	0	0	0	0	0	1	0	2	0	0	0	0	0	1	0	0	0	0	1	1	0	0	0	1	0	0	0	0	0	1	4	0	1	0	0	0	6	5	10
2	2	0	1	2	2	2	2	1	2	0	2	2	0	0	2	0	0	3	2	2	0	0	1	3	2	2	2	1	2	0	2	0	2	0	2	0	2	0	14	2	0	8	0	6	0	30	18	40
2	1	1	2	2	1	2	2	2	2	1	2	1	1	2	2	0	2	3	1	3	0	0	1	2	1	1	1	1	0	1	2	2	1	0	2	1	1	1	12	4	1	3	2	6	2	30	18	10
1	0	0	1	1	0	2	0	1	2	2	1	0	2	1	1	1	3	0	0	3	0	0	2	2	1	0	2	3	0	0	2	0	1	0	2	0	0	0	5	8	0	1	1	6	0	21	14	15
1	0	0	0	0	1	0	1	1	1	1	1	0	0	1	2	0	1	3	1	1	0	0	1	2	0	0	1	0	0	0	1	1	1	0	1	0	0	0	10	2	0	1	1	2	0	16	17	25
0	1	0	0	1	0	0	0	2	1	0	0	0	2	2	1	1	3	0	0	2	0	0	2	0	0	1	0	1	1	0	1	1	2	0	1	0	1	0	1	6	0	2	2	2	0	13	11	4
2	1	2	1	2	2	1	1	1	1	2	2	1	2	2	0	0	2	2	2	2	1	1	2	2	1	2	2	2	2	1	1	1	2	0	1	0	1	2	10	6	2	7	1	3	4	33	17	40
3	1	1	1	2	2	1	2	1	1	0	2	2	1	1	3	1	2	3	1	1	0	0	1	1	2	1	1	1	1	1	2	0	1	0	2	1	3	0	13	4	1	6	1	4	1	30	20	10
3	0	1	2	0	2	3	2	1	3	2	1	0	0	0	3	1	0	3	1	3	0	0	2	3	1	0	1	1	0	0	3	1	2	0	1	1	0	0	14	3	0	3	2	9	1	32	18	250
1	1	1	0	0	0	1	0	0	0	0	0	0	0	0	0	1	1	0	0	1	0	0	1	0	0	0	0	0	0	0	0	1	0	0	0	0	0	0	1	2	0	0	2	1	1	7	15	10
2	2	1	1	2	3	1	2	3	2	0	2	2	2	0	2	0	3	1	1	2	0	0	2	3	2	3	2	1	2	0	1	0	2	0	1	3	2	0	11	6	0	10	0	4	1	32	21	120
1	1	2	0	3	1	3	0	2	1	3	3	0	1	3	3	3	3	3	3	3	0	0	3	2	0	2	1	0	0	1	3	0	2	0	3	2	1	1	15	6	1	3	3	7	3	38	16	5
2	0	1	1	1	2	2	1	3	2	1	0	0	2	3	1	0	2	0	0	2	0	0	2	1	0	0	1	0	1	2	2	0	2	1	2	1	1	0	4	4	3	3	0	6	1	21	16	20
1	2	2	2	2	1	2	1	2	2	2	2	1	2	1	2	0	1	1	2	1	1	0	1	2	2	2	1	2	1	1	2	2	1	0	2	1	1	2	10	4	2	6	2	6	4	34	20	15
1	0	0	1	1	1	0	1	1	1	0	0	0	1	1	1	0	0	0	0	1	0	0	1	1	1	0	1	0	1	1	1	0	1	0	1	0	0	0	3	1	1	3	0	2	0	10	6	3
1	1	1	0	2	1	1	2	1	3	1	1	0	1	2	1	2	0	2	1	1	0	1	1	2	0	2	0	1	1	1	2	2	2	0	1	1	1	0	8	2	1	4	4	6	1	26	16	5
2	1	0	0	2	0	2	1	1	3	0	1	1	0	0	2	0	0	3	1	2	0	0	0	2	0	1	0	0	1	0	1	3	0	0	0	0	1	0	11	0	0	2	3	6	0	22	12	2
0	0	0	0	1	0	0	0	0	0	0	0	0	0	2	0	0	1	0	0	0	0	0	0	0	0	0	0	0	0	0	0	2	1	0	0	0	0	0	0	1	0	0	2	0	0	3	13	1
2	2	1	1	2	2	2	1	3	2	1	1	0	2	3	2	1	1	1	2	2	1	0	2	2	1	2	2	2	1	2	2	1	2	1	2	1	1	0	10	5	4	6	2	6	1	34	19	50
2	2	2	1	1	2	2	1	2	1	1	2	2	1	1	2	2	2	2	1	2	0	0	2	1	0	2	1	0	0	0	0	1	0	0	1	1	1	0	10	4	0	4	3	3	2	26	17	12
2	1	1	0	1	0	2	0	2	0	0	1	0	2	0	2	0	1	1	1	2	0	0	2	1	0	0	0	0	0	0	0	0	1	0	1	0	1	0	8	3	0	0	0	2	1	14	13	5
3	2	1	1	1	2	0	2	2	2	0	1	1	0	0	2	0	1	0	1	2	0	0	3	2	2	1	2	2	1	0	2	0	1	0	1	0	1	0	9	6	0	6	0	4	1	26	22	100
0	0	2	0	1	0	1	0	0	1	0	0	0	0	0	1	0	1	0	1	1	0	0	2	1	0	0	1	0	0	0	1	0	0	0	1	0	0	0	3	3	0	0	0	3	2	11	16	0
1	1	0	0	2	0	1	2	0	1	1	0	0	1	1	1	0	0	0	0	1	1	0	1	2	0	1	1	1	0	1	1	0	0	0	2	1	1	0	4	2	2	1	0	3	0	12	9	0
1	0	2	0	2	1	2	0	0	2	0	0	0	1	0	2	1	0	1	0	2	0	0	2	1	0	1	1	0	1	0	1	0	1	0	1	0	0	0	5	2	0	3	1	5	2	18	15	6
0	0	1	0	0	0	0	0	0	1	0	0	0	0	0	0	0	0	0	1	1	0	0	1	0	0	0	0	0	0	0	0	0	0	0	0	0	0	1	1	1	0	0	0	1	2	5	12	2
1	2	0	1	0	2	2	2	1	2	2	0	0	2	0	1	1	0	2	2	2	0	0	0	2	0	1	2	1	0	0	2	1	0	0	1	0	0	0	8	1	0	3	2	6	0	20	22	20
2	1	1	1	1	0	2	1	2	0	0	2	0	2	0	2	0	2	1	1	1	0	0	2	1	0	1	0	0	0	0	0	0	1	0	1	0	2	0	9	4	0	1	0	2	1	17	12	5
1	0	0	0	1	1	1	0	0	1	0	0	0	0	0	1	0	1	0	0	1	0	0	0	1	1	1	1	0	1	0	1	0	1	0	0	0	1	0	3	1	0	4	0	3	0	11	18	5
3	3	1	0	2	2	3	1	3	2	0	1	2	1	2	3	1	2	2	0	2	0	1	3	3	1	3	2	0	0	2	1	0	2	0	2	2	2	0	12	5	2	6	1	6	1	33	18	30
0	0	0	0	2	0	0	0	1	1	0	0	0	0	0	2	0	3	0	0	0	0	0	2	0	0	0	2	1	1	0	1	0	2	0	0	0	2	0	2	6	0	1	0	2	0	11	14	5
1	2	1	0	2	2	1	1	3	1	1	1	0	2	2	2	0	2	0	1	2	0	0	2	2	1	1	2	2	3	0	1	1	1	0	1	0	1	1	7	6	0	7	1	3	2	26	18	20
0	0	0	0	0	1	0	1	1	1	0	0	0	0	0	1	0	3	0	0	1	0	0	2	2	1	1	2	1	2	0	0	0	1	0	1	0	1	0	3	6	0	5	0	1	0	15	14	5
2	1	0	0	1	1	1	0	2	0	0	0	0	0	1	1	0	1	0	1	1	0	1	1	1	0	1	0	0	1	0	0	0	1	0	0	1	1	0	5	2	0	3	0	1	0	11	13	15
2	2	2	2	2	2	2	1	2	1	0	0	0	2	0	2	0	2	2	1	2	0	1	2	2	2	2	2	0	2	2	2	0	1	0	1	1	1	0	9	4	2	8	0	5	2	30	20	25
0	0	0	0	0	0	0	0	0	0	0	0	0	0	0	0	0	1	0	0	0	0	0	1	1	0	1	0	0	0	0	0	0	1	0	2	0	1	0	1	2	0	1	0	0	0	4	7	10
0	0	0	0	1	0	0	0	0	0	0	0	0	0	0	0	0	1	0	0	1	0	0	1	1	0	0	1	1	0	0	0	0	1	0	0	0	0	1	1	3	0	0	0	0	1	5	8	5
0	1	1	0	2	1	2	0	3	1	0	1	0	2	2	3	0	3	2	3	2	1	1	2	3	0	1	2	2	2	0	1	0	3	0	3	1	1	2	12	7	1	4	0	4	3	31	19	5
1	1	0	0	2	0	1	1	1	1	0	0	1	0	0	2	0	1	2	1	2	0	0	2	2	0	2	2	1	1	0	1	2	2	0	1	0	1	0	8	4	0	3	2	3	0	20	12	10
2	1	2	0	1	2	1	1	3	2	0	2	1	0	0	2	1	2	2	1	2	0	0	2	2	1	3	1	0	2	0	2	1	3	0	2	1	1	0	11	4	0	8	2	5	2	32	15	6
1	0	0	0	2	0	1	0	2	1	0	1	0	0	0	2	1	3	0	1	1	0	0	2	1	1	1	1	0	0	0	1	3	2	0	2	0	1	0	6	5	0	2	4	3	0	20	18	5
1	1	1	0	2	1	1	1	1	2	0	1	1	1	0	2	0	2	2	1	1	0	0	1	1	0	1	1	1	1	1	1	1	1	0	1	1	1	0	8	4	1	3	1	4	1	22	14	6
2	1	0	0	3	1	0	1	2	1	0	0	0	1	0	2	0	2	0	0	1	0	0	1	1	1	1	1	0	2	0	2	0	3	0	1	0	2	0	5	3	0	5	0	3	0	16	20	5
3	3	3	1	2	3	2	2	0	3	2	3	2	3	3	3	0	2	2	3	3	0	1	3	1	1	3	2	0	0	2	2	0	2	0	1	1	3	0	15	5	2	7	0	7	3	39	22	7
2	2	1	0	1	0	1	0	3	1	0	2	0	0	0	2	0	3	0	2	1	0	0	3	2	2	3	2	3	3	0	1	0	1	0	0	1	1	0	10	9	0	8	0	3	1	31	19	25
2	1	1	1	2	1	1	1	2	1	1	1	2	1	1	2	1	1	1	1	1	0	0	2	1	0	1	1	0	0	0	1	1	0	0	1	1	1	1	8	3	0	2	2	3	2	20	14	10
2	1	1	0	1	1	2	1	1	1	0	0	1	2	1	1	0	2	0	0	2	0	1	2	2	1	2	2	1	0	2	2	1	2	0	2	1	2	0	5	5	2	4	1	5	1	23	22	25
3	2	0	0	1	2	1	1	2	1	0	2	1	0	1	3	2	1	2	1	2	0	1	0	2	0	1	2	0	2	0	1	2	0	0	0	1	1	0	13	1	0	5	4	3	0	26	18	4
0	0	0	0	0	0	0	0	0	0	0	0	0	0	0	1	1	2	0	0	0	0	0	0	0	0	1	0	1	1	0	0	0	1	0	0	0	0	0	1	3	0	2	1	0	0	7	17	4
2	1	1	0	1	2	1	1	3	1	2	1	2	0	0	2	1	0	2	1	2	0	0	0	1	0	1	1	0	1	0	2	2	0	0	1	0	2	1	9	0	0	4	3	4	2	22	19	150
3	0	3	1	0	1	0	2	0	0	3	2	3	0	0	2	0	0	3	2	3	1	0	0	3	0	0	0	0	2	0	0	0	0	0	1	2	0	3	15	0	1	3	0	0	6	25	14	15
1	1	0	0	0	1	0	1	0	1	1	0	0	0	0	1	0	0	0	1	1	0	0	0	0	0	0	1	0	1	2	1	1	0	0	1	1	1	0	3	0	2	2	1	2	0	10	12	1
1	1	0	0	0	1	1	0	0	0	0	0	0	1	1	2	0	2	1	0	1	0	0	2	1	0	1	0	1	1	0	0	0	2	1	1	1	1	0	5	5	1	3	0	1	0	15	12	5
2	1	1	1	1	2	2	2	2	1	1	0	1	0	2	2	1	2	1	1	2	0	1	2	2	2	1	2	2	2	0	2	0	1	0	2	1	1	0	8	6	0	7	1	5	1	28	18	4
1	0	0	0	3	0	2	0	0	2	0	0	0	0	0	0	0	2	0	2	3	0	0	3	0	0	0	1	1	0	0	3	1	2	0	3	0	0	0	3	6	0	0	1	7	0	17	10	10
3	1	3	2	2	2	2	2	3	3	3	3	0	2	2	2	0	3	2	3	3	2	1	3	2	1	2	3	2	0	0	2	0	1	1	2	2	3	1	15	8	3	5	0	7	4	42	25	75
2	1	0	0	1	0	1	0	0	1	2	0	0	1	2	1	0	1	2	2	2	0	1	2	1	0	0	1	0	1	0	2	1	0	0	2	1	1	0	8	3	0	1	1	4	0	17	12	24
1	0	1	0	1	0	1	1	1	0	0	1	1	0	0	1	0	0	1	1	1	0	0	1	1	0	0	1	0	0	0	1	0	1	0	1	0	1	2	6	1	0	0	0	2	3	12	14	2
2	1	0	1	0	1	0	0	1	0	0	1	0	0	1	1	0	3	1	0	0	0	0	1	2	3	2	1	1	3	1	0	0	3	0	0	0	2	0	7	5	1	9	0	0	0	22	17	20
1	2	0	1	1	1	1	1	1	2	0	0	0	0	0	1	0	1	1	1	1	0	0	2	1	0	1	1	0	1	0	2	0	0	0	1	0	1	0	5	3	0	3	0	5	0	16	10	10
2	0	0	2	2	1	3	2	2	2	0	0	0	1	0	0	0	2	0	0	0	2	0	2	2	0	0	0	0	0	0	2	0	2	0	1	0	0	0	4	4	2	1	0	7	0	18	22	50
1	1	1	1	2	1	2	1	1	1	0	0	0	0	1	1	0	1	0	0	1	1	0	1	1	0	0	1	0	1	1	0	0	0	0	1	1	1	1	3	2	2	2	0	3	2	14	16	8
2	1	0	0	0	3	1	2	3	2	0	2	1	0	0	3	0	0	3	1	2	0	0	0	3	2	1	1	0	2	0	2	1	0	0	1	0	0	0	14	0	0	8	1	5	0	28	13	2
2	2	0	0	3	1	2	1	2	3	3	0	1	0	0	3	3	2	3	2	3	0	0	1	3	2	1	2	0	2	0	2	3	2	0	2	0	2	0	13	3	0	6	6	7	0	35	17	10
3	1	1	1	1	1	1	2	1	0	0	2	2	0	0	2	0	1	2	3	1	0	0	2	3	1	1	1	0	0	0	0	2	0	0	2	0	1	0	15	3	0	3	2	1	1	25	16	5
1	1	0	1	1	1	2	1	0	1	1	1	0	0	0	1	1	0	2	1	2	0	0	1	1	0	0	1	0	0	0	2	0	1	0	1	0	0	0	7	1	0	1	1	5	0	15	18	10
1	0	0	0	0	0	0	0	1	0	0	0	0	1	0	1	0	2	0	2	2	0	0	2	2	0	0	2	0	0	0	0	0	0	0	0	0	0	0	6	4	0	0	0	0	0	10	12	10
2	1	2	2	0	1	1	2	1	1	2	1	0	1	0	1	1	0	2	1	2	1	1	1	2	1	1	2	0	2	0	1	2	1	0	1	1	2	2	9	1	1	5	3	3	4	26	17	100
0	0	0	0	2	0	2	0	3	1	0	0	0	0	0	0	0	3	0	0	0	0	0	1	0	0	0	0	2	0	0	0	0	2	0	0	0	0	0	0	6	0	0	0	3	0	9	5	0
2	1	0	0	1	2	2	2	2	2	0	1	0	0	0	2	0	2	2	0	2	0	0	3	1	2	1	1	0	3	0	1	0	0	0	0	0	2	0	8	5	0	8	0	5	0	26	18	3
0	0	0	0	1	0	0	0	1	1	0	0	0	0	0	1	0	1	0	0	0	0	0	1	0	0	0	0	0	1	0	1	2	0	0	0	0	0	0	1	2	0	1	2	2	0	8	7	2
2	1	3	2	3	2	3	2	3	3	2	2	2	2	1	1	1	3	3	2	3	0	0	3	3	1	3	3	3	1	0	3	0	3	0	2	0	1	3	13	9	0	7	1	9	6	45	20	15
1	0	1	0	2	1	1	1	0	1	0	0	1	0	0	1	0	0	0	0	1	0	0	0	1	0	1	1	0	1	0	1	0	1	0	0	0	1	1	3	0	0	3	0	3	2	11	9	2
2	2	2	2	1	2	2	1	2	0	2	1	0	1	0	1	0	1	0	0	3	1	2	3	3	2	0	1	0	2	1	3	0	3	0	1	0	1	1	7	4	2	6	0	5	3	27	17	15
3	3	0	0	1	2	2	1	0	1	1	2	2	2	2	3	1	2	2	1	2	0	0	2	1	0	2	0	1	2	2	2	1	2	0	1	2	3	0	12	5	2	6	2	5	0	32	17	10
3	1	0	0	0	1	0	3	1	0	0	0	3	0	0	3	0	0	2	0	1	0	0	0	2	0	0	0	0	1	0	0	0	0	0	0	0	0	0	10	0	0	2	0	0	0	12	9	5
0	0	0	0	1	0	0	0	2	1	0	0	0	0	0	0	0	1	0	0	0	0	0	0	0	1	0	0	0	1	0	1	0	0	0	0	0	0	0	0	1	0	2	0	2	0	5	5	2
0	0	0	0	1	0	1	1	0	1	0	0	0	0	0	1	0	0	1	0	1	0	0	1	1	0	0	1	0	0	0	1	0	1	0	0	0	0	0	3	1	0	0	0	3	0	7	6	20
2	1	0	0	2	1	2	0	2	1	0	0	0	0	0	2	0	2	0	0	2	0	0	2	3	1	1	1	1	2	0	2	0	1	0	1	1	2	0	7	5	0	5	0	5	0	22	16	10
1	0	1	0	1	1	1	1	0	1	0	0	0	0	1	0	1	1	1	0	1	0	0	1	1	0	0	0	0	1	0	1	0	1	0	0	0	0	0	3	2	0	2	1	3	1	12	15	5
0	0	0	0	1	0	0	0	0	2	0	0	0	1	0	0	0	1	0	0	1	0	0	1	0	0	0	1	0	0	0	1	0	1	0	0	0	0	0	0	2	0	0	0	3	0	5	7	5
1	1	1	0	2	1	1	2	2	2	0	1	3	1	1	1	1	1	0	1	2	0	0	2	1	0	1	1	1	1	0	2	0	1	0	0	0	0	0	5	4	0	3	1	5	1	19	16	15
2	1	2	1	2	2	1	2	1	2	2	2	2	2	1	1	1	2	2	2	2	1	1	2	2	1	2	2	1	1	1	2	2	1	0	2	1	2	1	11	5	2	6	3	5	3	35	19	40
1	0	1	0	1	0	0	0	1	0	0	0	0	0	0	1	0	1	0	0	0	0	0	1	1	0	0	0	0	0	0	0	0	0	0	0	0	1	1	3	2	0	0	0	0	2	7	6	10
2	0	1	0	1	1	1	1	1	1	1	1	2	1	1	1	0	1	2	1	1	1	1	2	2	1	0	1	0	0	1	1	0	0	1	1	0	1	2	9	3	3	2	0	3	3	23	16	7
3	1	0	1	1	1	3	2	2	2	1	1	1	0	0	2	0	1	3	2	3	0	0	2	2	1	1	0	0	0	2	3	0	0	0	1	0	2	0	13	3	2	3	0	8	0	29	17	5
0	0	0	0	0	0	0	0	0	0	0	1	2	1	1	2	1	2	1	1	0	0	0	0	0	0	0	1	0	1	0	0	0	2	0	0	0	0	0	5	2	0	1	1	0	0	9	19	1
3	2	0	0	2	2	2	3	2	2	1	1	2	0	0	2	2	0	3	1	3	0	0	2	2	0	1	0	0	1	0	2	2	1	0	2	1	1	0	12	2	0	4	4	6	0	28	17	5
2	3	0	0	2	1	1	0	2	3	0	1	1	1	3	3	2	3	2	0	1	0	0	3	3	1	3	1	3	1	0	2	0	0	1	1	3	3	1	11	9	1	6	2	6	1	36	17	30
2	0	1	2	1	2	2	1	1	0	2	1	3	2	2	2	0	2	3	1	3	0	0	2	3	0	0	2	0	0	0	1	0	1	0	1	0	1	0	12	4	0	2	0	3	1	22	18	5
1	1	0	0	0	0	1	2	0	1	1	0	0	2	2	3	0	2	2	1	1	1	0	2	2	0	1	2	0	1	1	1	0	1	0	1	1	1	0	9	4	2	2	0	3	0	20	18	10
2	1	2	1	2	2	2	1	2	1	2	1	2	2	2	2	1	2	1	1	2	1	2	3	2	2	2	2	2	1	2	2	1	2	0	2	2	2	2	9	7	3	7	2	5	4	37	21	100
2	2	2	0	3	2	2	2	3	3	0	2	0	2	1	1	0	3	1	0	2	0	0	3	3	0	2	0	0	3	0	2	0	2	0	2	0	2	2	9	6	0	7	0	7	4	33	21	10
2	1	2	1	1	0	1	1	3	1	0	1	0	0	0	2	0	1	1	1	2	0	0	2	2	1	0	2	0	1	0	1	0	2	0	1	0	0	0	9	3	0	2	0	3	2	19	19	20
1	1	1	1	1	1	1	1	0	1	1	0	0	0	0	1	0	0	1	1	1	0	0	0	2	0	1	2	0	1	0	2	1	0	0	1	0	0	1	6	0	0	3	1	4	2	16	16	3
1	1	0	1	0	1	1	1	0	1	0	1	0	0	1	1	0	2	2	2	3	0	1	2	2	0	0	2	1	1	0	1	0	1	0	2	0	0	0	9	5	0	2	0	3	0	19	24	5
3	2	1	1	3	3	3	2	2	3	3	3	1	0	1	2	2	2	3	2	3	1	0	2	2	0	1	2	1	3	1	3	1	2	0	3	1	2	0	15	5	2	7	3	9	1	42	18	5
1	3	2	0	1	3	3	1	3	2	0	0	3	3	0	3	1	3	3	1	3	0	0	1	3	3	2	3	3	3	0	3	1	3	0	2	0	3	1	11	7	0	11	2	8	3	42	25	10
2	1	0	2	1	1	2	1	0	2	0	2	0	1	1	3	0	0	2	2	2	0	0	2	3	0	1	2	1	1	0	2	0	2	0	2	1	1	0	14	3	0	3	0	6	0	26	16	5
1	0	0	0	0	0	1	0	1	1	0	1	0	0	0	1	0	2	1	0	1	0	0	1	1	0	1	0	1	0	0	1	0	0	0	0	0	0	0	5	4	0	1	0	3	0	13	15	0
1	1	2	2	2	1	1	1	1	1	2	2	1	1	1	1	1	1	2	2	1	2	1	1	2	1	0	1	2	2	1	2	1	2	2	1	1	1	2	10	4	5	4	2	4	4	33	21	10
2	1	2	1	3	1	3	1	3	3	0	0	0	1	0	2	0	2	1	0	1	0	0	1	0	0	1	1	0	1	0	2	0	0	0	2	1	0	1	5	3	0	3	0	8	3	22	18	5
3	1	1	0	1	3	0	2	3	1	0	0	3	0	0	2	0	1	1	0	2	0	0	3	2	1	2	3	0	3	0	1	3	3	0	2	0	3	0	8	4	0	9	3	2	1	27	22	10
0	1	0	0	1	0	1	0	1	2	0	0	0	0	0	2	1	2	2	0	2	0	0	2	2	0	1	2	1	0	0	1	0	2	0	1	0	1	0	6	5	0	1	1	4	0	17	15	5
0	1	3	0	2	2	1	2	1	1	0	0	0	0	0	0	1	3	1	1	2	0	0	3	2	1	1	0	0	1	0	0	1	2	0	0	0	1	0	4	6	0	5	2	2	3	22	15	3
3	3	3	3	2	2	3	3	2	2	1	3	3	0	0	3	1	1	3	1	2	1	1	2	3	0	2	2	0	2	1	1	1	0	0	3	1	3	2	16	3	2	6	2	6	5	40	18	10
0	0	0	0	0	1	1	0	0	0	0	1	0	0	0	1	0	0	0	0	0	0	0	0	1	0	0	0	0	0	1	0	1	0	0	0	1	0	0	3	0	1	1	1	1	0	7	10	5
2	0	0	2	1	1	3	3	2	3	0	0	0	1	0	0	0	2	1	0	3	0	0	3	2	0	0	1	1	2	0	2	0	1	0	2	0	0	0	5	6	0	3	0	8	0	22	11	1
3	1	2	0	2	1	2	0	0	0	0	0	0	0	0	2	2	0	1	2	1	0	0	0	1	0	3	0	0	3	0	2	3	0	0	0	0	1	0	9	0	0	7	5	4	2	27	10	0
1	3	0	2	0	0	2	3	0	3	0	1	0	0	1	2	0	0	0	1	1	0	0	1	2	0	2	1	0	1	2	2	0	1	0	2	3	3	0	7	1	2	3	0	7	0	20	17	2
1	2	0	0	2	0	1	1	3	1	1	1	0	1	2	2	0	2	1	0	2	0	0	2	2	1	1	0	0	1	0	2	0	1	0	2	1	1	0	7	4	0	3	0	4	0	18	11	10
2	1	0	1	1	1	1	0	0	0	0	0	0	1	1	2	0	1	0	0	3	0	0	3	2	0	1	2	1	1	0	1	0	1	0	1	1	1	0	6	5	0	3	0	2	0	16	18	250
3	2	0	1	3	3	3	2	3	3	0	0	1	0	0	3	0	3	0	1	2	0	0	3	2	1	2	2	1	2	1	3	0	2	0	2	1	2	0	9	7	1	8	0	9	0	34	21	20
3	0	2	2	1	2	2	2	1	1	2	1	1	2	1	3	0	2	2	1	3	0	0	3	3	0	0	3	1	1	0	2	0	0	0	1	1	2	3	13	6	0	3	0	5	5	32	17	10
1	2	2	1	2	2	2	1	2	2	3	1	3	2	1	2	1	1	2	2	2	2	1	3	2	0	1	2	0	1	1	2	2	2	1	2	1	3	2	10	4	4	4	3	6	4	35	21	20
2	2	2	0	2	2	2	3	3	2	3	1	3	1	1	3	2	2	1	2	3	0	0	2	0	0	2	3	0	3	1	3	2	1	0	2	3	3	1	9	4	1	7	4	7	3	35	9	10
1	1	1	2	2	1	2	1	2	1	0	0	0	1	1	1	0	1	2	0	2	1	1	0	2	0	2	1	1	1	1	1	0	2	0	1	1	1	0	6	2	2	4	0	4	1	19	17	20
0	1	0	0	0	0	0	0	2	0	0	0	0	0	1	2	0	3	0	0	2	0	0	3	0	1	0	0	2	2	0	0	0	2	0	0	0	0	0	2	8	0	3	0	0	0	13	14	5
2	0	1	1	0	0	1	2	2	0	1	0	1	0	0	2	0	0	2	0	1	1	0	0	3	0	0	2	0	1	1	0	1	0	0	0	3	1	3	9	0	2	1	1	1	4	18	16	20
1	0	0	0	2	0	1	0	0	1	0	0	0	0	0	1	0	1	0	0	2	0	0	2	1	0	0	1	0	0	0	1	0	1	0	0	0	0	0	3	3	0	0	0	3	0	9	10	4
3	1	1	0	2	1	2	2	1	1	1	1	1	2	2	1	0	2	1	1	1	0	2	2	2	0	1	1	1	0	0	2	1	1	0	2	1	1	1	9	5	0	2	1	5	2	24	18	60
2	1	1	1	0	1	1	1	0	1	0	0	0	1	0	1	1	1	3	0	2	1	1	2	2	0	0	1	0	1	1	2	2	2	1	1	1	0	2	8	3	3	2	3	4	3	26	15	20
3	1	3	0	1	0	3	1	0	3	0	0	1	1	0	2	0	3	1	0	2	0	0	3	1	0	1	0	0	0	0	3	0	1	0	3	0	1	0	7	6	0	1	0	9	3	26	18	3
2	1	0	0	1	0	1	1	1	2	2	0	1	2	0	1	0	0	1	0	1	0	1	3	2	1	1	0	1	1	1	2	0	2	0	0	0	0	0	6	4	1	3	0	5	0	19	23	10
1	2	0	0	3	0	1	2	2	2	0	0	0	2	0	2	0	2	1	1	3	0	0	3	2	1	2	1	0	1	0	2	0	2	0	2	0	2	0	7	5	0	4	0	5	0	21	17	5
2	2	2	1	2	1	3	2	0	2	1	0	2	2	2	3	0	3	1	1	2	0	1	3	3	0	3	2	1	2	2	2	0	2	0	2	3	3	1	10	7	2	6	0	7	3	35	17	5
1	0	0	0	0	1	0	0	0	0	0	0	0	1	2	0	0	3	0	0	1	0	1	2	0	0	0	0	0	0	0	1	0	2	0	0	0	0	0	1	5	0	1	0	1	0	8	17	250
0	1	0	0	0	1	0	0	1	0	0	0	0	0	0	0	0	1	0	0	0	0	0	0	0	1	0	0	1	0	0	0	1	1	0	0	0	0	0	0	2	0	2	1	0	0	5	9	0.99
0	0	0	0	1	0	1	1	1	1	1	0	0	0	0	1	0	2	1	0	2	0	0	2	0	0	0	1	1	0	0	1	1	1	0	1	0	0	0	2	5	0	0	1	3	0	11	14	20
1	0	0	0	0	0	0	0	0	0	0	0	0	0	0	1	0	0	0	0	1	0	0	1	0	0	0	0	0	0	0	0	1	0	0	0	0	0	0	2	1	0	0	1	0	0	4	8	2
2	1	0	1	1	1	1	1	2	2	1	1	2	0	0	2	2	0	3	1	2	0	0	0	2	0	0	1	0	1	0	2	2	0	0	1	0	1	0	11	0	0	2	4	5	0	22	17	20
0	1	0	1	2	0	1	1	0	2	0	0	0	1	0	1	0	2	0	0	2	0	0	2	1	0	0	0	0	0	0	1	1	1	0	2	0	0	0	2	4	0	0	1	4	0	11	9	0
3	1	3	0	2	1	1	1	0	0	1	1	0	0	2	3	0	1	1	3	2	0	0	3	3	0	1	2	1	1	0	0	0	0	0	1	0	2	0	14	5	0	3	0	1	3	26	11	8
2	2	1	0	2	1	3	1	1	0	1	2	2	2	2	2	0	1	3	2	2	2	1	3	2	1	1	2	1	1	2	2	0	1	1	1	2	1	0	13	5	5	4	0	5	1	33	13	20
2	1	1	0	2	2	1	2	3	1	0	1	0	1	1	2	1	2	0	1	1	0	0	2	2	1	1	1	3	1	0	1	0	2	0	2	1	1	1	8	7	0	5	1	3	2	26	20	5
3	0	0	1	1	2	2	2	3	2	1	0	0	0	1	1	1	2	2	2	1	0	0	1	2	0	1	2	1	1	0	2	2	2	0	2	0	2	0	10	4	0	4	3	6	0	27	15	0
1	1	0	0	1	1	1	1	1	0	2	1	0	1	1	1	0	0	2	1	2	0	0	1	1	0	1	1	0	1	1	1	2	1	0	1	0	1	0	7	1	1	3	2	2	0	16	16	5
2	0	0	1	2	1	0	2	1	1	0	1	0	0	0	1	1	1	2	1	1	0	1	3	2	1	0	1	0	1	0	1	1	1	0	1	0	2	0	9	4	0	3	2	2	0	20	9	50
1	0	0	0	1	0	1	0	0	1	0	0	0	0	0	0	1	1	1	0	1	0	0	1	0	0	0	0	0	0	0	1	1	0	0	1	0	0	0	2	2	0	0	2	3	0	9	11	5
1	1	1	0	0	2	2	1	1	1	2	2	2	0	0	2	1	0	2	2	2	0	0	0	2	0	1	2	0	1	0	1	0	1	0	1	0	0	1	11	0	0	4	1	4	2	22	17	10
3	1	2	2	1	2	0	1	2	1	1	1	0	1	1	2	0	1	1	2	2	1	1	3	3	3	0	1	1	2	2	1	0	2	1	2	1	0	1	12	5	4	7	0	2	3	33	23	100
1	2	1	1	2	1	2	1	1	1	1	1	1	0	0	2	1	0	1	1	2	0	0	2	1	0	1	2	0	1	0	1	1	1	0	1	2	1	1	7	2	0	3	2	4	2	20	17	30
1	1	2	0	1	1	1	1	2	1	0	0	0	1	0	1	0	2	0	0	1	0	0	2	1	1	0	1	1	2	0	1	0	0	0	1	1	1	0	3	5	0	4	0	3	2	17	18	10
2	1	1	2	1	1	2	2	0	2	2	3	2	2	2	3	1	1	1	1	2	0	1	2	3	0	1	2	1	1	0	2	2	2	0	3	1	2	1	13	4	0	3	3	6	2	31	17	40
0	0	0	0	2	0	0	0	2	0	0	0	0	2	0	1	1	2	1	0	2	0	0	2	2	0	0	1	2	1	0	1	0	0	0	1	0	0	0	4	6	0	1	1	1	0	13	12	4.99
2	2	1	1	3	2	2	1	2	2	1	2	2	0	2	3	1	2	3	1	1	0	0	2	3	1	3	1	2	2	1	1	0	2	0	1	1	3	1	14	6	1	8	1	5	2	37	20	30
2	0	1	0	2	1	2	1	2	1	0	1	1	0	1	2	2	1	3	1	2	0	0	0	2	0	0	1	0	0	0	2	2	0	0	1	1	1	0	11	1	0	1	4	5	1	23	13	5
2	2	0	1	3	1	2	1	3	2	0	2	0	3	0	2	1	3	1	3	1	0	0	3	1	0	2	2	1	1	0	2	2	1	0	2	1	1	0	11	7	0	4	3	6	0	31	16	10
1	0	0	0	1	1	2	1	1	2	0	0	0	1	1	0	0	2	0	0	1	0	0	1	1	0	1	1	0	0	0	2	0	1	0	1	1	1	0	2	3	0	2	0	6	0	13	13	3
2	2	2	0	2	1	2	2	2	2	0	0	0	2	2	1	1	2	0	1	3	0	0	2	1	1	3	2	1	1	0	2	0	1	0	1	2	2	0	5	5	0	6	1	6	2	25	17	10
0	0	0	0	3	0	2	2	2	1	0	0	0	0	0	0	0	2	0	1	0	0	0	2	1	0	0	0	1	0	0	1	0	0	0	2	0	1	0	2	5	0	0	0	4	0	11	5	5
2	0	1	0	0	2	0	0	1	1	0	1	0	0	0	1	0	0	0	1	1	0	1	1	1	2	0	1	1	0	0	0	1	1	0	0	0	0	0	6	2	0	4	1	1	1	15	19	15
2	1	1	1	0	2	1	0	1	2	3	2	1	0	0	2	1	0	2	1	1	0	0	0	2	0	1	1	0	2	1	2	1	0	0	2	1	1	3	11	0	1	5	2	5	4	28	17	8
3	2	3	2	2	2	2	2	2	2	1	1	2	1	0	3	0	0	2	1	3	0	0	1	1	1	1	2	1	1	1	2	0	0	0	1	0	1	2	11	2	1	5	0	6	5	30	18	15
1	1	2	0	2	0	1	1	2	2	0	0	0	0	0	2	1	2	1	0	2	0	0	2	1	0	2	2	1	2	0	1	0	1	0	0	0	1	0	5	5	0	4	1	4	2	21	12	5
2	2	0	2	1	2	2	2	2	1	1	2	2	0	1	2	0	0	2	1	2	0	0	1	2	1	2	2	2	2	0	2	2	1	0	2	2	2	0	11	3	0	7	2	5	0	28	17	5
1	1	1	0	1	0	1	0	0	2	0	0	0	0	0	1	1	1	0	0	1	0	0	1	0	0	0	0	0	0	0	1	1	0	0	1	0	1	0	2	2	0	0	2	4	1	11	11	5
1	0	0	0	0	0	1	0	1	0	1	1	0	1	0	1	0	2	0	1	0	0	0	1	2	0	0	0	0	1	0	0	0	0	0	1	0	0	0	6	3	0	1	0	1	0	11	8	5
1	1	0	0	1	0	0	1	2	1	0	0	0	2	0	2	0	1	1	2	2	0	0	1	2	0	1	1	1	0	0	1	0	0	0	1	0	1	0	8	3	0	1	0	2	0	14	13	2
3	1	2	1	1	2	2	2	3	2	2	2	2	2	0	2	2	2	3	3	3	0	1	3	2	0	2	3	0	3	0	3	1	2	0	3	0	1	2	15	5	0	7	3	7	4	41	20	10
2	1	3	2	2	2	2	1	2	2	2	2	1	2	1	3	0	0	1	2	2	0	1	2	3	1	1	2	2	1	1	2	0	2	0	2	0	3	0	13	4	1	5	0	6	3	32	19	30
0	0	0	0	0	0	0	0	1	0	0	0	0	1	0	1	0	1	0	0	0	0	0	1	0	0	0	0	1	1	0	0	0	2	0	0	0	1	0	1	3	0	1	0	0	0	5	13	3
1	1	0	2	2	1	3	2	1	2	0	1	0	1	1	0	0	1	0	2	3	0	1	3	3	0	1	1	1	2	1	0	0	1	0	2	0	1	0	7	5	1	4	0	5	0	22	17	5
3	2	2	1	2	1	2	2	2	2	0	2	0	0	0	2	1	1	2	2	2	0	1	3	2	0	1	2	0	1	0	1	1	1	0	2	1	1	0	13	4	0	3	2	5	2	29	17	20
1	2	0	0	2	2	1	1	2	2	0	1	0	0	0	0	1	2	0	0	0	0	0	2	1	3	2	1	1	2	1	2	0	2	0	1	0	0	0	3	5	1	9	1	5	0	24	18	30
1	1	1	3	1	1	1	2	1	1	1	0	0	0	0	0	0	0	0	0	3	0	0	2	2	1	1	1	1	1	0	2	0	0	0	1	0	1	0	3	3	0	4	0	4	1	15	19	100
0	0	2	0	1	0	0	0	0	1	0	0	0	0	0	0	0	0	1	1	1	0	0	1	0	0	0	0	0	0	0	0	0	2	0	1	0	0	1	2	1	0	0	0	1	3	7	14	0
1	1	0	0	1	1	1	0	0	1	0	0	0	1	0	1	0	1	0	1	1	0	0	1	2	0	1	0	0	1	0	1	0	2	0	0	0	0	0	5	2	0	3	0	3	0	13	14	10
0	0	0	2	1	0	1	0	3	0	0	0	0	2	0	1	0	3	0	0	1	0	0	2	2	1	1	1	1	2	1	1	0	2	0	1	1	2	0	3	6	1	4	0	2	0	16	20	10
1	0	0	1	1	0	2	1	2	1	0	0	0	2	1	2	0	2	0	0	2	0	1	3	1	0	0	1	1	0	1	1	0	1	0	1	1	0	0	4	6	1	0	0	4	0	15	12	10
2	1	2	1	0	2	0	0	0	0	1	0	0	0	0	1	0	0	2	1	0	1	0	0	3	2	0	1	1	1	0	0	1	0	0	0	1	0	2	9	1	1	5	1	0	4	21	17	100
1	0	1	1	2	1	1	0	2	2	0	0	1	0	0	2	1	3	0	0	1	0	0	3	1	1	2	1	1	1	0	1	0	1	0	1	0	2	0	4	7	0	5	1	4	1	22	18	5
2	1	1	2	2	0	2	1	3	1	0	0	0	0	0	1	0	2	1	0	2	0	0	3	2	1	0	1	0	2	0	2	1	2	0	2	0	1	1	6	5	0	3	1	5	2	22	18	10
1	0	1	0	2	0	3	1	0	2	0	0	0	1	0	0	2	0	0	2	3	0	0	1	2	0	0	1	0	0	0	3	1	0	0	1	0	0	0	5	1	0	0	3	8	1	18	12	30
2	2	2	1	3	2	2	2	3	2	0	1	3	0	1	3	1	3	2	2	2	0	0	1	3	0	3	1	1	2	2	2	1	0	0	2	0	3	0	13	5	2	7	2	6	2	37	22	25
3	1	2	1	0	2	2	1	1	0	0	2	1	0	0	2	0	0	3	1	2	0	2	0	3	1	1	1	0	1	0	1	1	0	0	1	0	1	3	14	0	0	5	1	3	5	28	22	10
2	0	2	0	2	0	3	2	1	1	0	0	0	2	1	1	2	2	1	0	2	0	0	2	3	0	0	2	0	1	2	3	1	1	0	2	1	1	0	7	4	2	1	3	7	2	26	19	2
1	0	0	2	2	2	0	1	0	0	1	2	2	0	0	1	0	1	3	1	3	0	0	2	1	0	0	2	1	0	0	0	1	2	0	2	0	0	0	9	4	0	2	1	0	0	16	17	50
1	1	0	1	0	1	1	0	0	1	0	1	0	0	0	1	0	2	0	0	1	0	0	2	1	3	2	1	1	1	0	1	0	0	0	1	0	1	0	4	5	0	7	0	3	0	19	15	15
2	2	1	2	2	1	1	2	1	1	2	1	1	0	0	2	0	0	3	1	2	0	0	0	3	0	1	2	1	1	1	2	0	1	0	2	0	2	0	12	1	1	3	0	4	1	22	19	15
1	0	1	2	1	1	3	1	2	2	0	1	2	2	2	2	2	1	1	2	1	0	0	2	1	1	0	1	1	1	1	1	0	1	1	1	0	0	1	8	4	2	3	2	6	2	27	18	20
1	1	1	2	0	1	0	1	1	1	0	0	1	2	0	2	1	1	1	1	1	0	0	1	1	0	1	1	1	1	0	2	1	3	0	1	0	2	1	6	3	0	3	2	3	2	19	19	40
1	0	1	1	1	1	1	1	1	1	1	1	0	1	1	1	0	2	2	1	2	0	0	1	1	0	1	1	1	0	0	1	0	1	0	1	0	1	1	7	4	0	2	0	3	2	18	12	5
1	0	3	1	0	2	3	2	0	3	2	0	0	0	0	0	0	0	2	0	3	2	0	0	2	1	0	2	0	1	0	2	0	0	1	2	1	0	1	5	0	3	4	0	8	4	24	13	0
1	0	2	0	2	0	1	0	3	1	0	0	1	2	0	1	0	2	1	1	0	0	0	2	2	0	0	1	2	0	0	1	0	1	0	0	0	0	0	6	6	0	0	0	3	2	17	15	15
1	0	0	0	1	0	1	1	1	1	0	0	0	1	1	0	0	0	0	1	0	0	0	1	1	0	1	0	1	1	0	0	0	1	0	1	0	0	0	3	2	0	2	0	2	0	9	14	5
3	3	0	2	1	2	3	1	0	1	1	2	1	0	0	2	1	0	3	3	3	0	0	0	1	2	2	1	0	2	1	1	1	0	0	2	0	2	0	14	0	1	8	2	5	0	30	23	8
1	0	3	0	1	0	2	1	2	0	0	0	1	0	0	1	0	1	0	0	1	0	0	2	1	1	1	1	1	2	0	1	0	2	0	2	0	1	0	3	4	0	4	0	3	3	17	12	1
3	2	1	1	3	3	2	1	2	3	0	1	1	0	0	2	2	2	2	2	2	0	0	3	2	0	0	2	0	0	0	2	2	1	0	1	0	1	0	12	5	0	3	4	7	1	32	14	3
0	0	0	0	1	2	2	0	0	3	1	2	0	0	0	0	0	0	3	3	2	0	0	0	0	1	0	0	0	1	0	3	1	0	0	3	1	1	0	8	0	0	4	1	8	0	21	14	10
1	1	1	2	1	1	1	0	3	1	0	1	0	2	1	1	2	2	0	1	2	1	1	1	1	1	2	1	1	2	2	1	1	0	1	1	1	1	1	5	4	4	6	3	3	2	27	20	10
1	0	0	0	1	0	0	0	0	1	0	0	0	2	0	2	0	2	0	0	0	0	0	1	0	0	1	0	0	1	0	0	0	1	0	1	0	1	0	3	3	0	2	0	1	0	9	9	5
1	0	0	0	2	0	0	0	1	1	0	0	0	1	0	0	0	1	0	1	1	0	0	3	2	0	0	1	0	0	0	1	1	3	0	3	0	0	0	4	4	0	0	1	2	0	11	9	0
3	3	3	0	3	3	2	0	2	2	0	1	0	0	0	3	1	0	3	1	1	0	0	3	2	0	0	0	0	0	0	0	0	1	0	1	2	2	2	13	3	0	3	1	4	5	29	16	20
1	0	0	0	1	1	0	0	0	0	0	0	1	0	0	2	0	0	1	0	0	0	0	1	0	0	0	0	0	0	0	0	0	1	0	0	0	1	0	4	1	0	1	0	0	0	6	10	0
2	0	1	0	3	3	2	2	3	3	0	0	1	0	0	0	0	2	0	0	2	0	0	3	2	3	0	1	0	3	0	3	0	0	0	1	0	0	0	4	5	0	9	0	8	1	27	17	20
1	1	1	0	2	2	2	1	2	2	0	0	0	0	0	1	0	1	0	0	1	0	0	1	1	1	1	1	0	0	0	1	0	1	0	0	0	1	0	3	2	0	4	0	5	1	15	14	10
1	2	0	0	1	1	2	1	1	1	1	1	0	2	1	1	1	1	0	0	1	0	0	2	1	0	2	1	0	2	0	0	0	2	0	0	1	1	0	4	3	0	5	1	3	0	16	17	20
2	0	0	0	0	1	1	1	1	0	0	0	1	1	0	2	0	1	1	0	1	0	0	1	1	0	0	1	1	0	0	1	0	1	0	1	0	0	0	6	3	0	1	0	2	0	12	17	10
1	1	0	0	1	0	1	1	1	2	0	1	1	0	0	1	1	1	1	0	1	0	0	1	1	0	0	1	0	0	0	1	0	0	0	1	1	1	0	5	2	0	0	1	4	0	12	11	5
2	0	0	0	2	3	0	1	0	2	0	0	0	0	0	1	0	0	0	1	3	0	0	2	1	0	1	1	0	1	0	3	0	0	0	2	1	0	0	5	2	0	5	0	5	0	17	16	0
2	3	1	1	2	2	0	1	1	2	1	1	1	0	1	2	1	1	0	0	2	0	0	0	1	1	0	2	0	1	1	1	1	0	2	1	2	1	2	6	1	3	4	2	3	3	22	17	50
2	1	0	0	2	2	3	2	0	1	0	0	1	1	0	2	1	1	1	2	0	0	0	2	1	0	2	0	0	1	0	1	3	2	0	0	1	2	0	8	3	0	5	4	5	0	25	14	4
2	1	1	1	3	1	2	2	2	1	2	2	1	1	1	2	0	1	2	2	2	1	0	2	3	1	0	1	1	1	2	2	0	1	1	1	0	1	1	13	4	4	3	0	5	2	31	23	100
1	1	0	1	0	1	1	1	0	1	1	2	1	0	0	2	0	1	2	2	2	0	0	1	1	0	1	0	0	1	0	1	0	0	0	0	0	0	0	10	2	0	3	0	3	0	18	16	5
3	2	0	0	1	3	2	1	3	1	0	1	3	1	0	3	0	2	3	1	2	0	1	3	3	3	3	1	0	2	0	2	0	3	0	1	0	3	0	14	5	0	11	0	5	0	35	23	7
3	1	2	2	0	3	1	0	3	0	0	0	0	0	0	2	0	0	1	0	0	0	0	0	3	1	1	0	1	2	1	3	0	0	0	1	0	1	3	9	1	1	7	0	4	5	27	14	5
1	2	2	2	2	2	2	3	3	3	1	2	0	2	2	2	1	1	0	1	2	1	2	1	2	2	1	1	2	2	2	0	0	0	0	1	0	2	0	8	4	3	7	1	5	2	30	15	2
2	1	2	0	1	1	3	2	1	2	0	0	0	1	1	2	1	1	2	2	2	0	0	1	1	0	1	0	0	1	0	2	2	1	0	1	2	1	2	9	2	0	3	3	7	4	28	13	15
2	1	0	1	1	0	1	0	0	0	2	0	0	0	0	2	0	0	3	2	0	0	0	0	2	0	1	0	1	2	0	1	0	0	0	1	2	1	0	11	1	0	3	0	2	0	17	16	20
1	1	2	1	1	0	1	2	1	2	0	1	0	2	1	1	1	0	1	0	1	0	0	1	1	1	2	0	0	1	1	1	1	2	1	2	1	0	1	5	1	2	4	2	4	3	21	11	20
3	2	0	1	3	2	1	3	3	2	3	2	1	0	0	3	0	2	3	0	3	0	0	3	3	1	1	3	2	3	0	3	0	2	0	3	0	2	0	14	7	0	7	0	6	0	34	20	20
2	1	1	1	1	2	0	0	2	0	2	0	0	2	2	1	0	2	0	2	1	0	1	2	1	0	0	2	1	1	1	1	0	2	0	1	1	1	1	6	5	1	3	0	1	2	18	13	10
0	0	0	0	1	0	1	0	0	0	0	0	0	0	0	1	1	0	0	0	1	0	0	0	0	0	0	0	0	0	0	0	2	2	0	0	0	1	0	1	0	0	0	3	1	0	5	9	1
1	0	1	2	2	1	0	0	1	1	1	0	0	0	0	1	0	0	0	0	0	0	0	1	1	0	0	1	1	1	0	0	0	2	0	1	1	0	1	3	2	0	2	0	1	2	10	23	5
0	0	1	0	1	0	1	0	2	1	0	0	0	0	0	0	0	2	0	0	2	0	0	1	0	0	0	0	0	1	0	1	0	1	0	1	0	0	0	0	3	0	1	0	3	1	8	14	10
1	1	1	0	1	1	1	0	1	0	0	1	1	0	0	1	2	2	1	0	0	0	0	1	1	0	1	1	2	0	0	0	1	0	0	1	0	1	1	5	5	0	2	3	1	2	18	19	15
0	0	1	0	2	0	0	0	3	1	0	0	0	0	0	0	0	2	0	0	3	0	0	2	1	0	0	0	2	0	0	1	0	1	0	0	0	0	0	1	6	0	0	0	2	1	10	7	15
2	1	0	0	1	0	1	1	1	2	1	1	0	0	0	2	0	0	3	1	2	0	1	1	2	0	0	1	0	0	0	2	1	0	1	1	1	0	1	11	1	1	0	1	5	1	20	16	20
1	2	2	2	1	1	0	2	2	0	0	1	1	2	2	2	1	2	2	1	2	1	1	1	2	1	2	1	2	1	1	2	0	1	1	1	1	2	2	9	5	3	5	1	2	4	29	18	10
1	0	0	0	0	0	1	1	0	1	0	0	0	0	1	1	0	0	2	1	1	0	0	0	0	0	0	1	0	0	0	1	0	1	0	0	0	0	0	5	0	0	0	0	3	0	8	5	10
2	2	1	2	2	1	2	2	2	1	1	2	2	1	1	2	1	1	2	1	2	1	2	2	2	0	0	2	1	2	1	1	0	1	1	1	0	0	0	11	4	3	3	1	4	1	27	20	10
0	0	0	0	1	0	1	0	0	1	0	0	0	0	0	1	0	1	0	1	1	0	0	1	0	0	0	0	0	0	0	0	0	1	0	1	0	0	0	2	2	0	0	0	2	0	6	13	0
1	0	3	1	1	1	0	1	1	2	1	1	1	0	0	1	1	0	1	1	2	0	0	1	2	0	1	1	0	1	0	3	1	1	0	2	0	0	3	7	1	0	3	2	5	6	24	19	5
1	0	1	0	2	1	2	2	1	3	1	0	0	2	2	1	1	3	0	1	2	0	0	3	2	0	0	2	1	0	1	2	0	3	0	3	1	1	0	5	7	1	1	1	7	1	23	15	10
0	0	0	0	2	0	1	0	1	1	1	0	0	0	0	1	0	0	1	0	3	0	0	0	1	0	0	1	0	1	0	0	0	1	0	0	0	0	0	3	0	0	1	0	2	0	6	14	0
3	2	1	2	1	1	3	2	3	1	1	2	1	2	2	2	0	2	2	3	2	2	2	3	2	1	2	2	1	1	2	2	1	3	0	2	2	2	1	14	6	4	5	1	6	2	38	20	10
1	2	1	1	2	2	2	2	2	2	1	2	3	2	1	3	0	1	3	1	2	1	0	2	1	1	3	1	1	2	2	1	0	2	0	1	1	3	0	11	4	3	8	0	5	1	32	17	10
2	3	3	0	3	3	3	3	3	3	2	2	2	2	2	2	1	2	2	2	3	0	2	3	3	2	2	3	2	1	2	3	2	1	1	2	2	2	1	13	7	3	8	3	9	4	47	21	30
1	0	1	0	1	0	1	1	1	1	1	0	0	3	1	0	0	3	0	1	1	0	1	3	1	0	0	1	3	0	0	1	1	1	0	3	0	1	0	3	9	0	0	1	3	1	17	15	30
3	3	3	3	0	2	1	2	3	0	3	3	3	0	0	3	0	0	2	2	1	3	0	0	2	2	1	0	1	2	1	0	1	0	0	0	2	2	3	15	1	4	7	1	1	6	35	23	25
3	1	0	1	1	2	1	1	1	1	0	0	1	1	0	3	0	0	1	0	1	0	0	2	2	0	1	0	0	2	0	1	0	1	0	1	0	1	0	9	2	0	5	0	3	0	19	12	5
2	3	1	1	3	1	3	2	2	3	1	1	3	0	1	3	3	0	3	0	3	0	0	0	0	3	3	0	0	1	0	0	2	0	0	1	2	2	0	9	0	0	8	5	6	1	29	20	50
1	1	0	1	2	1	3	2	1	1	0	0	0	0	0	1	0	2	0	0	1	0	0	2	2	0	0	2	1	1	0	2	0	1	0	2	0	0	0	4	5	0	2	0	6	0	17	18	10
2	2	0	1	1	2	3	1	0	2	2	3	1	1	0	3	1	0	3	2	1	0	0	1	2	1	2	1	0	1	2	2	1	2	1	1	2	1	0	15	1	3	6	2	7	0	34	21	20
2	1	1	1	3	1	2	2	3	1	0	1	1	1	0	2	0	1	2	1	3	0	1	2	2	1	2	1	0	2	0	2	1	2	0	1	1	2	0	10	3	0	6	1	5	1	26	17	10
2	3	1	0	1	3	1	0	3	1	0	2	0	1	0	2	0	2	0	0	2	0	0	1	1	3	2	3	3	3	3	3	0	1	0	1	0	2	0	7	6	3	11	0	5	1	33	24	50
2	1	1	2	2	2	1	2	3	1	1	1	2	0	1	3	2	1	3	0	3	0	1	3	2	0	2	3	1	1	0	3	2	2	0	1	0	1	1	11	5	0	5	4	5	2	32	17	10
1	1	1	0	1	1	1	1	0	1	0	0	0	1	0	0	1	1	0	0	1	0	0	1	3	0	1	1	1	0	0	0	0	0	0	0	0	0	1	4	3	0	2	1	2	2	14	18	1
3	2	2	3	2	3	3	2	3	2	3	2	2	3	3	2	2	2	2	2	3	2	2	3	3	2	3	3	3	2	2	2	2	2	2	2	3	2	2	14	8	6	10	4	7	4	53	22	100
3	1	1	1	1	1	2	2	2	1	1	1	2	1	0	3	2	0	3	2	2	0	0	0	2	1	1	2	0	1	1	1	2	0	0	0	0	1	0	14	0	1	4	4	4	1	28	16	25
2	1	1	0	3	3	2	0	2	0	0	0	3	0	0	2	0	2	0	0	2	0	0	2	3	3	3	1	0	3	0	2	0	2	0	3	0	1	0	7	4	0	12	0	4	1	28	24	20
2	1	1	1	1	2	2	1	1	3	0	0	0	0	0	1	1	0	1	1	1	0	0	0	0	0	0	1	0	1	0	1	1	0	0	2	1	1	0	5	0	0	3	2	6	1	17	9	1
1	0	1	0	1	0	2	0	0	2	0	0	0	0	0	0	0	1	2	1	2	0	0	1	0	0	0	1	0	0	0	2	0	1	0	1	1	1	2	4	2	0	0	0	6	3	15	13	4.99
1	0	0	0	1	0	1	1	1	0	0	0	0	0	0	1	0	0	1	1	1	0	0	0	0	0	0	0	0	0	0	1	0	0	0	0	0	0	0	4	0	0	0	0	2	0	6	13	0
1	1	0	0	1	2	1	1	1	1	0	2	1	1	0	1	1	2	0	2	1	0	0	1	2	1	1	0	0	1	0	1	2	2	0	1	0	1	0	8	3	0	5	3	3	0	22	16	20
2	1	3	2	1	1	0	0	2	1	1	1	2	3	2	2	0	0	1	1	0	1	1	3	2	0	1	0	2	1	2	0	0	1	2	0	1	2	0	9	5	5	3	0	1	3	26	21	60
2	2	2	0	2	0	2	0	3	0	0	1	0	1	0	1	0	2	0	0	2	0	0	2	2	2	2	1	0	2	0	0	0	0	0	2	1	1	0	6	4	0	6	0	2	2	20	16	10
3	3	0	0	0	3	3	0	3	0	1	0	0	0	0	3	0	0	0	3	0	0	0	3	3	0	0	0	0	0	0	0	0	0	0	3	0	0	0	12	3	0	3	0	3	0	21	17	45
1	1	0	0	0	0	0	1	2	2	1	0	1	1	0	2	0	1	1	0	1	0	0	1	2	0	2	1	1	2	1	1	1	1	0	1	0	1	0	6	3	1	4	1	3	0	18	16	5
0	0	0	0	0	0	1	0	1	1	0	0	0	0	0	0	0	0	0	0	0	0	0	1	0	0	0	0	0	0	0	1	0	1	0	0	0	0	0	0	1	0	0	0	3	0	4	8	5
1	1	2	0	2	1	2	1	3	2	1	0	0	2	1	2	0	0	0	0	2	0	0	3	1	0	2	0	0	1	1	1	0	2	0	0	1	2	0	4	3	1	4	0	5	2	19	18	10
3	2	3	1	1	2	1	1	3	2	2	2	2	0	0	3	1	0	3	2	2	0	2	1	2	0	1	2	1	0	0	2	1	2	0	0	1	3	1	15	2	0	3	2	5	4	31	21	25
1	1	0	0	2	1	1	1	2	1	0	1	0	0	0	1	0	2	0	0	2	0	0	2	1	1	1	0	1	1	0	1	0	1	0	1	0	1	0	4	5	0	4	0	3	0	16	14	3.99
1	0	1	2	1	0	1	0	1	2	0	0	0	0	0	1	0	2	0	0	1	0	0	2	1	0	0	1	1	1	0	0	0	0	0	0	0	0	0	3	5	0	1	0	3	1	13	12	2
2	3	0	1	2	2	2	2	1	1	0	2	0	1	1	2	0	3	2	1	1	0	0	3	2	1	3	1	3	2	1	2	0	3	0	1	1	2	0	11	9	1	8	0	5	0	34	14	70
3	2	2	2	3	2	3	3	1	3	2	2	1	0	2	3	1	0	3	1	2	1	1	1	3	1	2	1	1	1	2	3	1	2	0	3	2	2	3	15	2	3	6	2	9	5	42	23	10
1	0	1	0	2	0	2	0	1	1	0	0	1	2	0	1	0	2	0	0	2	0	0	2	1	0	0	0	0	1	0	1	1	3	0	1	0	0	0	3	4	0	1	1	4	1	14	20	15
3	0	1	1	1	2	2	0	2	3	2	1	0	1	2	0	0	2	1	2	2	2	0	3	2	0	3	1	0	0	3	1	0	0	2	1	2	2	0	9	5	7	5	0	6	1	33	9	10
2	0	2	1	0	0	2	1	1	0	0	0	0	1	0	2	0	0	0	0	0	0	0	2	1	0	0	0	0	0	0	0	0	0	0	0	3	0	0	5	2	0	0	0	2	2	11	13	30
2	3	2	1	2	1	3	2	2	2	2	3	2	1	2	1	2	2	2	2	2	2	3	1	3	3	3	2	2	1	2	1	0	1	0	2	0	1	3	13	5	4	8	2	6	5	43	24	500
2	0	0	1	2	1	2	0	2	1	0	0	0	0	1	2	1	1	0	0	1	0	0	2	2	0	2	1	1	1	0	2	1	0	0	1	0	0	0	6	4	0	4	2	5	0	21	12	5
2	1	2	0	2	2	3	1	1	2	0	0	0	0	1	2	0	1	0	1	2	0	0	1	1	0	1	0	0	1	0	1	0	2	0	2	0	1	0	6	2	0	4	0	6	2	20	14	2
3	3	3	0	3	3	2	2	3	2	0	2	2	2	0	3	0	2	2	2	3	0	1	3	3	1	2	0	2	2	0	2	1	3	0	3	0	3	2	15	7	0	8	1	6	5	42	24	10
1	1	1	0	1	1	0	1	1	1	0	2	0	1	0	2	1	0	1	0	1	1	0	0	1	0	2	0	0	2	0	1	1	0	0	1	2	1	0	7	0	1	5	2	2	1	18	12	1
2	0	2	0	2	2	2	1	0	2	2	0	1	0	0	1	1	1	1	1	2	0	0	2	3	1	0	0	0	1	0	2	0	1	0	1	0	0	2	8	3	0	4	1	6	4	26	21	20
1	1	1	2	1	1	1	1	2	1	2	2	0	2	2	1	0	2	2	2	2	0	0	2	1	2	2	1	2	1	1	2	1	2	0	0	1	1	0	9	6	1	6	1	4	1	28	20	250
2	2	2	1	2	2	2	1	2	2	2	2	2	1	2	2	2	1	2	2	2	1	2	2	2	1	2	2	2	2	2	2	1	2	2	2	1	1	2	12	5	5	7	3	6	4	42	20	20
2	2	3	2	2	3	2	2	3	2	1	2	1	2	3	3	0	2	2	2	2	2	3	2	2	2	3	3	3	3	1	1	2	2	2	3	3	2	2	13	7	5	11	2	5	5	48	23	150
1	0	1	0	2	0	2	0	0	1	2	2	0	1	0	2	1	1	1	2	1	0	0	2	1	0	0	1	0	0	0	2	0	1	0	1	0	1	0	9	3	0	0	1	5	1	19	16	0
1	0	0	1	0	1	0	0	1	1	1	1	0	0	0	1	1	0	3	1	1	0	0	0	1	0	0	0	0	1	1	2	1	0	0	0	0	0	0	8	0	1	2	2	3	0	16	13	5
2	1	2	0	2	2	0	0	0	0	1	1	1	2	2	1	1	1	2	0	1	1	1	1	1	1	2	1	1	0	1	2	2	1	1	1	1	1	1	7	3	3	5	3	2	3	26	16	10
1	3	1	0	0	1	1	2	0	0	3	1	2	1	1	3	0	1	3	1	3	1	0	2	3	0	2	1	0	1	3	1	1	1	0	1	0	2	1	12	3	4	4	1	2	2	28	19	5
2	1	0	1	1	1	2	2	3	2	1	2	2	0	1	2	1	0	3	3	2	0	0	0	3	1	1	2	0	2	0	1	2	0	0	1	1	0	0	15	0	0	5	3	5	0	28	20	20
3	1	1	1	3	2	3	2	2	1	1	1	1	3	3	2	0	3	1	2	3	1	1	3	2	0	1	2	2	0	0	3	0	1	0	3	1	1	0	11	8	1	3	0	7	1	31	13	15
0	1	2	1	2	1	1	0	1	1	1	1	0	1	0	1	0	1	0	0	1	0	0	2	1	0	0	0	1	0	1	1	0	2	0	2	0	0	1	3	4	1	1	0	3	3	15	19	3
3	2	1	2	0	3	2	0	2	0	2	3	0	2	2	3	0	1	2	2	3	0	0	3	3	2	0	1	1	0	0	3	0	2	0	2	0	0	1	16	5	0	5	0	5	2	33	25	10
1	1	0	0	1	1	1	1	1	1	0	1	1	0	0	1	0	1	1	0	1	0	0	1	1	1	1	1	1	1	0	1	0	0	0	1	0	1	0	5	3	0	4	0	3	0	15	20	50
2	1	2	1	1	2	2	2	3	0	2	2	1	1	1	1	1	2	1	2	2	0	0	2	2	0	1	2	0	0	1	2	0	2	0	1	1	2	2	10	4	1	3	1	4	4	27	22	35
0	2	0	0	2	0	0	0	2	0	0	0	0	0	0	2	0	3	0	0	2	0	0	3	2	0	0	0	0	0	0	2	0	0	0	0	0	0	0	4	6	0	0	0	2	0	12	9	5
3	3	1	1	1	3	3	1	3	1	0	3	2	1	1	3	1	3	2	3	3	0	0	2	3	0	3	2	1	0	1	3	0	1	0	3	0	3	3	17	6	1	6	1	7	4	42	20	20
1	0	0	0	0	0	2	0	0	1	0	1	0	3	2	1	0	2	0	0	3	1	0	3	0	0	1	1	0	0	0	2	0	0	0	0	0	0	0	3	5	1	1	0	5	0	15	17	4
0	1	0	1	1	2	1	0	2	2	0	0	0	1	0	2	0	2	1	0	2	0	0	1	1	2	0	1	1	1	0	2	0	2	0	2	0	0	0	4	4	0	5	0	5	0	18	21	5
1	1	0	1	2	1	2	2	1	2	1	1	2	0	0	2	0	0	3	1	3	0	1	2	2	1	1	1	1	1	0	3	0	2	0	2	0	1	0	10	3	0	4	0	7	0	24	23	20
3	2	0	2	2	3	3	3	3	1	3	3	3	3	1	3	2	1	3	3	3	3	3	3	3	3	3	1	2	3	3	3	3	2	2	2	2	3	0	18	6	8	12	5	7	0	56	22	20
1	0	0	0	1	0	1	0	0	2	0	0	1	1	0	2	1	3	0	0	3	0	0	3	0	0	0	1	1	2	0	1	1	0	0	1	1	1	0	3	7	0	2	2	4	0	18	11	5
1	0	3	0	2	0	0	1	3	1	2	0	0	3	2	1	0	0	0	2	2	3	0	2	3	0	0	2	0	2	1	1	0	2	0	2	0	0	3	7	2	4	2	0	2	6	23	13	5
3	2	1	1	1	3	1	2	3	0	1	3	1	0	0	3	0	1	1	2	3	0	1	2	3	3	1	1	0	2	0	2	0	1	0	1	0	2	0	15	3	0	9	0	3	1	31	17	4
3	0	0	2	1	2	0	0	1	0	1	0	0	2	1	2	1	2	3	1	3	0	0	1	3	0	1	2	1	0	0	1	2	2	0	1	1	1	0	12	4	0	3	3	1	0	23	18	25
1	1	1	0	1	0	1	1	0	1	0	0	0	0	0	1	0	2	0	0	2	0	0	2	1	0	0	0	0	1	0	1	0	1	0	1	1	1	0	3	4	0	1	0	3	1	12	11	10
1	1	2	1	0	2	1	1	1	2	1	1	1	1	1	2	1	2	2	0	0	2	1	1	1	2	2	1	2	1	2	1	2	1	1	1	1	2	1	7	5	5	7	3	4	3	34	18	1
3	2	3	1	0	2	2	2	1	1	0	2	1	2	2	3	1	1	1	2	1	1	0	3	3	1	2	0	2	1	1	2	0	2	3	2	1	2	3	14	6	5	6	1	5	6	43	22	55
2	0	0	0	0	1	0	0	1	1	2	1	0	1	0	2	0	0	2	1	2	0	0	1	2	0	0	0	0	0	1	2	0	1	0	2	0	0	0	10	1	1	1	0	3	0	16	17	25
2	1	1	2	2	2	1	1	1	1	1	0	0	1	1	2	1	1	0	1	2	0	0	2	3	1	1	2	0	2	1	1	1	2	0	1	1	2	0	8	3	1	6	2	3	1	24	22	10
0	0	1	0	1	0	0	1	0	0	0	0	0	0	0	1	0	1	1	0	1	0	0	2	1	0	1	1	1	0	0	0	1	0	0	1	0	1	0	3	4	0	1	1	0	1	10	16	2
0	1	0	0	1	0	0	0	0	0	1	0	0	0	0	1	1	0	2	2	1	0	1	0	1	0	1	0	0	0	0	2	1	0	0	0	0	0	0	6	0	0	1	2	2	0	11	13	0
0	0	1	0	0	0	0	0	1	1	0	0	0	2	0	0	2	2	1	0	2	0	0	2	0	0	0	1	0	0	0	0	2	3	0	1	0	1	0	1	4	0	0	4	1	1	11	14	5
1	0	0	1	1	1	1	1	1	1	2	1	0	2	2	2	2	2	1	0	1	0	2	1	1	0	1	1	2	0	0	2	0	1	0	2	0	0	1	6	5	0	2	2	4	1	20	13	0
2	2	2	2	2	2	2	2	1	1	2	0	2	2	2	3	0	2	1	0	2	1	2	2	2	2	2	0	1	2	1	2	0	2	1	2	2	2	0	8	5	3	8	0	5	2	31	21	25
1	1	1	0	1	1	1	1	1	1	0	0	1	1	0	1	0	1	1	1	1	0	0	1	1	0	0	0	0	1	1	1	1	1	0	1	0	1	0	5	2	1	2	1	3	1	15	17	10
0	1	2	1	2	0	3	2	2	2	0	0	0	3	2	1	2	3	2	1	3	0	1	2	3	1	1	1	0	3	0	3	0	1	0	2	0	0	0	7	5	0	5	2	8	2	29	13	15
1	0	1	0	0	1	0	0	1	1	0	0	0	0	0	1	0	0	0	0	0	0	0	0	0	2	0	0	0	2	2	1	0	1	1	1	0	0	2	2	0	3	5	0	2	3	15	13	10
1	2	2	0	2	1	1	1	0	1	0	0	1	2	2	1	0	2	1	1	2	0	1	1	2	0	0	1	1	0	1	1	0	2	0	1	1	2	1	6	4	1	1	0	3	3	18	14	10
3	3	1	2	3	2	2	1	3	2	1	2	3	0	1	3	1	0	3	1	2	0	0	1	3	1	1	3	0	2	1	2	2	0	0	1	0	1	1	15	1	1	6	3	6	2	34	23	20
0	0	0	2	2	1	1	1	2	1	0	2	0	2	2	2	0	0	1	0	3	0	0	3	2	1	1	1	0	0	0	0	0	1	0	2	0	1	0	7	3	0	3	0	2	0	15	20	12
2	0	2	2	0	1	2	0	1	0	0	1	2	0	0	3	2	0	1	0	1	0	0	2	3	0	1	2	0	0	0	1	1	0	0	2	0	2	3	10	2	0	2	3	3	5	25	18	5
2	0	2	0	3	0	1	1	3	0	0	1	0	0	0	0	0	3	0	0	2	0	0	2	3	1	0	2	0	0	0	2	0	2	0	2	0	0	1	6	5	0	1	0	3	3	18	20	5
0	1	1	0	1	2	0	0	1	1	1	1	0	0	1	0	0	0	0	0	0	0	0	0	0	0	0	0	1	0	0	1	1	0	0	0	0	0	0	1	1	0	2	1	2	1	8	18	5
2	1	0	2	1	1	2	2	2	2	0	0	0	2	1	2	0	2	2	0	2	0	0	1	2	0	0	0	1	1	0	2	0	2	0	1	2	0	0	8	4	0	2	0	6	0	20	16	50
1	1	1	1	1	2	2	1	3	2	1	0	0	3	3	3	0	3	0	0	1	0	2	3	3	0	2	2	1	2	1	1	0	0	0	1	3	3	0	7	7	1	6	0	5	1	27	17	5
0	0	0	0	0	0	0	0	0	0	0	0	0	0	0	0	0	0	0	0	0	0	0	0	0	0	0	0	0	0	0	0	0	1	0	0	0	0	0	0	0	0	0	0	0	0	0	6	0
2	1	2	1	1	2	2	1	0	2	1	1	1	1	0	1	1	0	2	2	2	1	1	1	2	1	1	2	0	0	1	1	1	1	0	2	0	1	2	10	1	2	4	2	5	4	28	20	15
1	1	1	0	2	0	0	0	1	0	0	0	0	0	0	2	2	1	0	2	1	0	0	2	1	0	1	2	1	1	0	0	2	0	0	1	0	1	0	6	4	0	2	4	0	1	17	12	5
0	0	1	0	3	1	0	0	0	0	0	1	0	0	1	0	2	1	0	0	3	0	0	2	1	0	0	0	0	1	1	1	0	1	0	0	0	0	0	2	3	1	2	2	1	1	12	5	20
1	0	1	0	2	0	2	0	0	1	0	0	0	1	0	2	0	1	0	0	1	0	0	2	1	0	0	1	1	0	0	1	0	1	0	2	1	1	0	4	4	0	0	0	4	1	13	11	3
0	1	0	0	0	0	1	0	2	1	0	0	0	0	0	1	0	0	0	0	0	0	0	1	0	0	0	2	1	0	0	0	1	1	0	0	1	0	0	1	2	0	0	1	2	0	6	10	5
2	1	1	0	1	1	1	1	2	1	2	2	2	2	2	2	0	1	2	1	2	2	1	2	2	1	1	2	1	1	1	2	0	1	1	2	1	2	0	11	4	4	4	0	4	1	28	18	5
2	0	2	1	2	0	3	1	1	2	0	1	0	0	0	0	0	2	0	1	2	0	0	2	1	0	0	2	2	1	0	2	0	1	2	3	0	0	2	5	6	2	1	0	7	4	25	19	5
2	1	1	0	0	0	1	2	0	1	1	1	0	0	1	0	0	2	2	0	2	1	1	1	2	0	1	0	1	0	2	1	0	3	0	0	2	1	0	7	4	3	1	0	3	1	19	20	0
1	1	0	0	1	0	2	1	2	2	0	0	0	1	0	2	0	2	1	1	1	0	0	1	2	0	2	0	2	2	0	0	0	2	0	1	1	2	0	7	5	0	4	0	4	0	20	12	1
1	1	1	0	2	2	3	0	2	3	0	0	0	1	0	1	0	0	1	1	2	0	0	2	1	0	1	2	1	1	0	2	1	1	0	2	1	0	1	5	3	0	4	1	8	2	23	17	20
0	0	0	0	1	0	1	0	0	1	0	0	0	0	0	1	0	0	1	0	2	0	0	2	1	0	0	2	0	0	0	2	0	0	0	1	0	0	0	3	2	0	0	0	4	0	9	8	0
1	0	3	3	2	0	1	3	3	3	2	2	0	1	1	0	0	1	1	3	3	0	3	2	3	0	0	0	0	1	1	3	0	1	0	3	0	1	0	10	3	1	1	0	7	3	25	20	15
1	0	0	0	1	1	1	0	0	1	1	0	1	0	1	1	0	0	2	0	1	1	0	1	1	0	1	0	0	1	0	1	3	1	0	2	2	2	2	5	1	1	3	3	3	2	18	19	30
1	1	1	1	2	2	2	0	3	2	0	1	0	2	0	2	0	2	2	1	3	0	0	1	2	2	3	1	3	2	1	0	0	2	0	1	2	2	0	9	6	1	9	0	4	1	30	19	3
0	0	0	0	1	0	0	1	1	1	1	1	1	0	0	1	1	0	1	0	1	0	0	1	1	0	1	1	0	0	0	1	1	0	0	1	0	1	0	4	1	0	1	2	2	0	10	15	3.99
1	2	1	0	3	1	3	2	1	2	0	0	0	2	0	3	0	3	2	1	2	0	0	3	0	0	2	2	1	3	0	1	1	0	0	1	2	3	0	7	7	0	6	1	6	1	28	12	5
1	0	2	0	2	2	0	2	1	0	0	0	0	0	0	0	0	1	1	1	3	1	0	2	2	2	0	1	0	0	0	0	1	0	0	2	0	0	0	5	3	1	4	1	0	2	16	14	0
0	0	0	0	0	0	0	0	0	0	0	0	0	1	0	1	0	0	0	0	0	0	0	1	1	0	0	0	0	1	0	0	0	0	0	0	0	0	0	2	1	0	1	0	0	0	4	8	8
1	1	0	0	3	0	2	2	2	2	0	0	0	0	0	1	0	2	0	0	1	0	0	1	0	1	0	2	0	1	0	1	0	2	0	0	0	0	0	2	3	0	2	0	5	0	12	16	5
0	1	0	0	1	0	0	0	0	1	0	0	0	2	1	1	0	3	0	0	1	0	0	1	0	0	0	0	0	0	1	2	0	1	0	0	0	0	0	1	4	1	0	0	3	0	9	5	0
0	0	0	0	1	0	1	1	0	1	0	0	1	0	0	0	1	1	1	0	0	0	0	0	0	0	0	0	0	0	0	1	0	1	0	1	0	0	1	1	1	0	0	1	3	1	7	9	2
1	1	0	0	1	1	3	0	0	0	0	0	0	0	0	2	0	1	1	3	0	0	0	1	2	0	3	1	1	2	0	3	0	3	0	1	0	3	0	9	3	0	6	0	6	0	24	13	1
1	1	0	0	1	1	1	1	1	2	0	1	0	1	1	3	1	3	2	0	1	0	0	3	2	0	2	2	1	0	0	2	0	1	0	1	1	2	0	9	7	0	3	1	5	0	25	10	1
0	0	0	0	1	1	2	2	2	3	0	0	0	0	0	0	0	2	0	0	1	1	0	2	3	3	3	0	3	2	0	0	0	1	1	0	0	1	0	3	7	2	9	0	5	0	26	17	10
1	2	0	0	2	1	2	2	2	1	1	2	1	0	0	3	0	0	3	3	1	0	0	2	2	0	2	2	0	2	1	2	0	1	0	0	2	3	0	14	2	1	5	0	5	0	27	15	15
3	1	0	1	3	1	2	3	3	2	3	1	0	0	2	2	0	0	1	1	2	0	0	3	3	1	1	1	0	2	0	3	0	3	0	1	0	1	1	11	3	0	5	0	7	1	27	16	20
0	0	0	0	2	0	0	0	1	0	0	0	0	0	0	1	0	3	0	0	3	0	0	3	2	1	2	1	0	3	0	1	0	1	0	0	0	0	0	3	6	0	6	0	1	0	16	17	2
2	1	2	1	2	1	1	1	2	2	1	0	1	1	0	1	0	1	2	2	1	0	1	2	2	0	1	1	0	1	1	2	0	0	0	1	1	0	2	9	3	1	3	0	5	4	25	20	50
2	2	2	0	2	1	1	2	1	1	2	1	2	2	0	2	0	2	2	2	2	0	2	2	2	0	3	2	1	2	2	2	0	2	0	2	2	3	1	11	5	2	6	0	4	3	31	11	2
1	0	0	0	1	0	1	0	2	1	0	0	0	1	0	0	0	0	0	0	0	0	0	1	1	0	0	0	0	0	0	1	0	0	0	0	0	0	0	2	1	0	0	0	3	0	6	11	3
2	3	1	0	2	2	0	0	3	2	0	1	1	1	2	2	0	3	1	2	2	0	0	3	1	3	3	2	2	3	0	1	0	2	0	1	0	1	0	9	8	0	11	0	3	1	32	12	1
3	2	2	1	0	3	3	1	2	2	2	0	2	0	0	3	3	1	2	2	3	1	1	2	3	1	0	2	0	3	0	2	0	0	0	2	2	0	1	13	3	1	7	3	7	3	37	16	45
1	2	3	1	2	1	0	2	3	1	2	2	0	1	1	2	0	1	1	1	0	0	2	2	2	1	3	1	1	3	2	1	0	3	0	1	0	2	0	9	4	2	8	0	2	3	28	19	50
1	1	0	0	0	0	0	0	1	1	0	0	1	0	0	2	0	0	0	0	0	0	0	1	0	0	1	0	0	1	0	1	0	1	0	0	0	1	0	3	1	0	2	0	2	0	8	10	3
2	1	2	2	0	2	2	0	1	2	1	1	1	0	0	2	0	0	2	1	2	0	0	2	2	0	2	0	2	3	0	0	0	1	0	0	0	2	0	10	4	0	7	0	4	2	27	23	2
0	0	0	0	0	1	0	0	0	0	0	0	0	0	1	2	1	0	1	0	0	0	0	0	1	0	0	0	0	1	0	1	2	2	0	1	0	0	0	4	0	0	2	3	1	0	10	16	16
1	1	2	0	0	1	1	1	1	1	1	1	0	1	0	2	0	0	0	2	2	0	1	3	2	1	0	1	1	1	0	1	0	1	0	1	0	0	0	8	4	0	3	0	3	2	20	14	5
2	1	1	1	1	1	2	1	3	2	1	0	2	2	1	2	0	2	2	1	1	0	1	1	2	0	1	0	0	1	0	2	0	2	0	1	0	1	1	9	3	0	3	0	6	2	23	18	75
1	1	0	1	2	0	2	2	3	2	0	0	0	1	2	1	0	2	0	0	0	0	0	3	1	1	2	1	2	1	0	1	0	1	0	1	0	2	0	3	7	0	4	0	5	0	19	14	5
0	0	1	1	2	0	1	0	0	1	0	0	0	0	0	1	0	2	0	1	2	0	0	2	0	0	0	1	2	0	0	1	0	2	0	1	0	0	1	2	6	0	0	0	3	2	13	7	10
0	1	1	1	1	1	0	1	1	1	1	1	1	2	0	2	0	2	1	2	1	1	1	3	1	0	1	1	1	0	0	2	0	2	0	2	1	1	0	7	6	1	2	0	3	1	20	17	8
1	0	1	0	1	1	1	1	2	0	0	0	0	0	0	1	0	2	0	0	0	0	0	1	1	1	0	1	2	1	1	0	0	1	0	1	0	1	1	3	5	1	3	0	1	2	15	10	5
2	2	2	1	2	1	2	1	2	2	0	0	1	0	0	2	0	1	2	0	2	0	0	1	2	0	1	1	0	2	0	1	1	1	0	2	0	1	0	8	2	0	4	1	5	2	22	18	10
3	0	3	1	3	3	2	2	3	0	0	0	2	0	0	2	1	2	1	0	1	0	0	2	2	1	1	1	2	1	0	1	0	3	0	2	2	2	0	8	6	0	6	1	3	3	27	20	20
2	2	2	0	1	1	0	2	2	2	0	1	2	1	1	2	0	0	1	0	0	1	1	1	2	0	0	1	0	1	1	2	0	1	0	2	3	0	0	8	1	2	2	0	4	2	19	10	5
0	0	0	0	0	0	0	0	0	1	0	0	0	0	0	1	1	0	3	0	0	0	0	0	0	0	0	0	0	0	0	0	3	0	0	0	0	0	0	4	0	0	0	4	1	0	9	7	5
2	1	1	1	3	1	1	2	2	1	0	2	2	1	1	2	1	1	1	1	2	0	1	2	1	0	1	1	1	2	0	2	1	2	0	2	1	0	1	9	4	0	4	2	4	2	25	21	15
1	2	2	0	2	1	2	2	0	1	0	1	0	1	0	2	2	2	2	0	1	0	0	1	2	0	1	2	0	2	0	2	1	2	0	0	1	1	0	8	3	0	4	3	5	2	25	15	75
3	2	2	1	3	2	3	3	3	2	2	3	3	1	1	2	1	3	3	2	1	0	2	2	3	1	2	2	2	1	1	2	2	1	0	2	2	3	3	16	7	1	6	3	7	5	45	22	20
3	2	2	0	2	2	2	1	3	2	0	2	0	1	0	3	0	2	2	2	2	0	0	2	2	1	1	2	1	0	0	3	0	2	0	2	0	2	0	14	5	0	4	0	7	2	32	18	10
3	2	0	0	1	0	1	1	1	1	1	0	1	0	1	3	1	0	2	2	2	0	0	1	0	0	1	0	0	0	0	1	2	1	0	0	0	1	0	10	1	0	1	3	3	0	18	11	5
1	1	2	0	0	0	1	0	1	2	0	0	1	1	1	3	1	0	2	0	2	0	0	0	0	0	0	1	0	1	0	2	2	0	0	0	0	2	0	6	0	0	1	3	5	2	17	9	3
0	0	0	0	0	0	0	0	0	0	0	0	0	1	2	1	0	0	0	0	0	0	0	1	0	0	0	0	0	0	0	0	0	2	0	0	0	0	0	1	1	0	0	0	0	0	2	8	20
1	2	1	1	1	1	3	2	3	2	2	2	2	1	2	2	2	2	1	1	3	3	1	2	2	0	3	1	1	2	0	2	1	1	2	2	1	1	1	9	5	5	6	3	7	2	37	15	100
3	2	0	0	2	1	2	0	3	2	0	1	0	0	0	1	0	2	2	0	2	0	0	2	2	0	2	2	1	2	0	1	2	2	0	0	0	2	0	9	5	0	5	2	5	0	26	6	0
2	1	3	1	0	2	0	2	2	3	1	0	2	2	0	1	0	0	1	1	0	0	1	2	3	1	0	1	1	1	0	2	0	1	0	1	0	0	0	8	3	0	4	0	5	3	23	23	10
1	1	0	1	1	1	1	2	1	2	1	2	0	2	1	2	1	1	3	1	3	1	0	2	1	0	1	2	1	1	1	2	0	1	0	2	2	2	0	10	4	2	3	1	5	0	25	16	20
3	3	2	3	2	2	2	1	2	2	0	1	0	0	0	2	0	3	3	2	2	0	2	2	3	2	3	2	1	1	0	3	0	1	0	2	1	2	1	14	6	0	8	0	7	3	38	18	25
3	2	2	3	1	2	3	1	0	3	0	2	1	1	1	2	0	1	2	3	2	2	0	1	3	1	2	2	0	1	1	2	0	0	0	1	1	2	0	15	2	3	6	0	8	2	36	13	5
1	0	0	0	1	0	1	0	1	1	2	0	1	0	0	2	0	0	2	1	0	0	0	0	1	0	0	0	0	1	1	0	2	1	1	1	2	0	2	7	0	2	1	2	2	2	16	12	5
1	1	1	0	1	1	1	2	1	1	0	0	0	0	0	1	0	0	1	0	0	0	0	0	0	0	0	0	0	1	0	1	1	1	0	0	0	0	2	3	0	0	2	1	3	3	12	12	3.98
2	1	2	1	2	2	2	2	1	2	1	1	0	2	1	2	1	1	1	1	2	0	1	2	2	1	1	1	1	0	1	2	1	1	0	2	1	1	0	9	4	1	4	2	6	2	28	14	30
3	3	0	2	3	1	0	2	3	1	3	3	0	2	3	2	0	2	3	2	2	1	0	2	3	0	1	3	0	3	0	3	0	3	0	2	2	2	0	16	4	1	5	0	4	0	30	21	5
2	3	3	0	1	1	1	3	1	1	3	3	0	0	0	0	0	1	3	2	1	0	0	3	3	0	1	2	0	1	0	3	0	0	0	3	1	0	3	13	4	0	3	0	5	6	31	19	5
1	1	0	1	0	1	1	0	0	1	0	1	0	0	0	1	0	2	0	0	3	0	0	2	2	0	1	2	0	1	0	0	0	1	0	1	0	0	0	5	4	0	3	0	2	0	14	17	0
1	1	1	0	0	0	0	1	0	0	0	1	0	0	0	2	3	1	0	0	0	1	1	1	0	1	3	0	0	2	0	0	1	0	0	0	2	1	1	4	2	1	6	4	0	2	19	6	0
3	1	2	1	3	0	3	1	0	3	3	3	0	3	1	2	0	3	1	3	3	1	1	2	2	0	2	1	3	0	3	3	0	0	1	2	0	2	0	14	8	5	2	0	9	2	40	17	30
2	0	1	0	1	2	2	0	0	1	0	0	0	1	1	1	0	2	0	1	2	0	1	2	1	1	1	1	0	1	0	1	0	0	0	1	0	1	1	5	4	0	5	0	4	2	20	18	10
3	0	0	1	2	0	2	2	2	1	0	1	1	3	1	2	1	2	3	0	2	0	0	3	2	0	0	2	1	1	0	2	0	2	0	2	0	1	0	11	6	0	1	1	5	0	24	18	5
2	2	2	1	3	2	1	2	3	3	1	0	1	0	0	2	1	3	2	1	2	0	0	2	1	1	0	2	2	1	0	1	1	2	0	2	0	0	0	8	7	0	4	2	5	2	28	17	10
2	0	0	0	2	0	2	2	0	2	0	0	1	1	1	2	0	1	2	2	2	0	0	2	2	0	0	2	0	0	0	1	0	0	0	0	0	0	0	10	3	0	0	0	5	0	18	14	2
1	1	0	0	0	1	3	0	1	2	0	1	0	2	2	2	0	2	0	0	3	0	0	3	3	1	0	3	1	0	0	0	0	2	0	1	1	0	0	7	6	0	2	0	5	0	20	10	15
2	1	1	0	2	1	1	2	1	1	2	1	0	1	1	2	1	2	1	0	1	0	0	2	2	0	1	0	1	2	2	1	0	3	0	1	1	1	0	8	5	2	4	1	3	1	24	17	5
2	3	0	2	1	1	0	1	2	0	0	1	1	2	2	3	0	2	0	0	2	0	0	3	3	2	1	2	0	1	0	3	0	2	0	2	0	0	2	9	5	0	5	0	3	2	24	22	10
3	2	3	1	0	3	2	2	0	0	1	0	1	0	3	3	1	2	2	3	1	3	3	2	0	2	1	0	2	1	1	1	3	1	0	1	3	0	2	11	6	4	7	4	3	5	40	18	50
1	1	0	1	1	1	1	1	1	1	0	0	1	0	1	1	1	1	1	0	1	0	1	1	1	0	0	1	0	0	1	1	1	1	0	1	0	0	0	4	2	1	1	2	3	0	13	11	15
1	0	2	0	2	1	2	1	3	2	0	1	0	0	0	1	1	3	0	0	2	0	0	1	1	1	1	1	2	0	0	2	0	2	0	1	0	0	0	4	6	0	3	1	6	2	22	22	5
0	1	0	0	2	2	0	3	3	0	0	0	0	2	1	1	1	1	1	3	0	0	1	2	3	0	1	1	2	0	1	2	0	2	0	0	1	0	1	8	5	1	3	1	2	1	21	23	40
0	0	0	0	0	0	0	0	0	0	0	0	0	0	0	0	0	1	0	0	0	0	0	1	0	0	0	0	1	0	0	0	0	0	0	0	0	0	0	0	3	0	0	0	0	0	3	11	25
2	0	1	2	3	2	3	3	3	3	3	0	2	1	1	2	0	1	3	3	3	0	1	2	3	0	0	0	1	0	0	3	1	1	0	2	0	0	1	13	4	0	2	1	9	2	31	20	10
1	0	0	0	1	1	1	0	0	0	0	0	0	0	0	1	0	0	1	0	2	0	0	0	0	0	1	0	0	1	0	1	0	0	0	1	0	0	0	3	0	0	3	0	2	0	8	10	0
3	2	3	2	1	3	1	3	3	1	2	1	3	1	0	3	1	0	3	3	1	2	0	0	3	0	1	1	0	2	0	1	1	0	0	0	2	1	3	16	0	2	6	2	3	6	35	25	100
3	1	2	1	2	2	2	2	1	3	2	1	0	0	0	2	2	0	3	0	2	0	0	0	1	0	0	1	0	1	1	3	2	0	0	2	0	2	3	10	0	1	3	4	8	5	31	21	3
2	3	2	1	3	1	2	1	2	2	1	0	0	0	0	3	2	2	1	3	3	0	0	3	0	0	0	0	0	1	0	2	0	1	0	1	0	1	2	9	5	0	2	2	6	4	28	13	75
1	0	2	0	1	1	1	0	0	0	0	1	1	1	0	1	2	0	1	1	0	0	0	2	1	0	0	0	0	0	2	0	2	1	0	0	0	1	0	6	2	2	1	4	1	2	18	13	5
1	1	2	1	2	2	2	3	1	1	0	1	2	2	1	2	2	2	1	2	2	1	3	1	2	2	1	2	2	1	1	3	2	2	2	2	1	1	2	9	5	4	6	4	6	4	38	17	15
3	1	3	1	2	2	2	2	3	2	0	0	2	0	2	2	0	0	2	1	2	0	0	1	2	1	1	1	0	2	0	1	1	0	1	1	0	1	0	10	1	1	6	1	5	3	27	19	15
0	0	0	0	3	0	3	0	0	0	0	0	0	0	0	3	1	3	0	3	3	0	0	3	1	0	0	1	3	0	0	2	0	2	0	1	0	1	0	7	9	0	0	1	5	0	22	6	10
2	0	0	0	2	0	2	0	2	2	1	1	1	1	2	1	0	2	1	0	1	0	1	2	1	0	1	0	1	1	0	2	0	1	0	1	1	1	0	6	5	0	2	0	6	0	19	23	40
3	3	1	1	1	3	1	2	3	1	0	1	2	1	0	1	1	1	2	2	1	0	1	1	1	0	1	1	1	0	0	1	0	1	0	1	1	0	0	10	3	0	4	1	3	1	22	19	10
2	2	2	1	3	3	2	2	1	2	1	1	0	1	1	3	0	1	1	0	1	0	0	3	1	0	2	1	0	0	0	3	0	1	0	2	2	1	0	8	4	0	5	0	7	2	26	19	10
1	1	0	1	2	1	2	2	2	2	1	1	1	0	0	1	1	0	2	2	2	0	0	0	2	0	0	0	0	0	1	2	1	0	0	1	0	1	0	9	0	1	1	2	6	0	19	14	4
1	0	0	0	2	1	1	1	2	0	0	0	0	0	0	2	0	2	0	0	1	0	0	1	2	0	0	1	0	0	0	1	0	2	0	2	0	0	0	5	3	0	1	0	2	0	11	15	4
3	0	0	1	2	0	2	2	3	3	0	0	0	0	0	2	3	0	3	2	3	2	0	0	0	0	0	0	0	0	0	2	2	0	0	0	0	0	0	10	0	2	0	5	7	0	24	16	0
1	1	1	0	2	1	3	0	0	2	0	1	0	2	0	3	0	2	1	1	1	0	0	2	2	0	0	0	1	0	0	1	0	0	0	1	2	1	0	9	5	0	1	0	6	1	22	14	5
2	1	2	1	2	1	2	2	1	2	2	3	2	3	1	3	1	2	3	3	3	1	0	3	2	2	1	3	1	1	2	3	1	3	1	3	3	3	1	16	6	4	5	2	7	3	43	19	30
1	1	1	0	2	0	2	3	2	3	2	1	0	0	1	2	0	0	3	2	3	0	0	0	1	0	0	1	0	0	0	2	0	0	0	1	1	0	1	10	0	0	0	0	7	2	19	9	4
0	1	0	0	2	0	2	0	0	3	0	0	0	2	1	1	0	2	0	2	0	0	0	1	0	1	1	0	1	1	0	1	0	2	0	1	0	1	0	3	4	0	3	0	6	0	16	8	2
0	0	0	0	0	1	0	0	1	0	1	0	0	1	1	1	0	0	2	1	0	2	0	0	2	0	0	1	0	0	0	0	0	0	0	0	1	0	1	6	0	2	1	0	0	1	10	14	15
3	2	2	1	3	3	2	2	2	3	0	2	2	0	0	3	2	1	2	2	2	1	1	3	3	2	2	2	0	2	0	2	1	1	0	2	2	2	2	15	4	1	9	3	7	4	43	17	5
2	2	0	0	3	1	3	0	1	3	1	1	1	0	0	2	1	0	3	0	2	0	1	0	3	0	1	1	1	1	0	2	2	1	0	1	0	0	1	11	1	0	3	3	8	1	27	13	50
1	0	1	1	1	0	2	1	1	1	0	0	0	1	1	1	0	2	1	0	2	0	0	2	1	0	1	1	1	0	0	1	1	1	0	1	0	0	0	4	5	0	1	1	4	1	16	15	10
2	2	0	1	1	1	1	0	2	1	1	0	0	1	1	0	0	2	2	2	0	0	0	0	0	1	1	1	2	1	0	1	0	1	0	1	0	1	1	6	4	0	4	0	3	1	18	18	5
2	1	1	0	2	1	1	2	1	2	2	0	1	1	1	1	1	1	2	0	3	0	0	3	2	0	2	1	1	1	0	2	1	2	0	2	1	1	0	7	5	0	4	2	5	1	24	18	5
3	3	2	2	1	3	3	2	0	2	2	2	3	0	0	2	1	2	3	2	2	2	2	1	3	2	2	3	2	3	3	3	2	0	0	2	2	2	2	15	5	5	10	3	8	4	50	23	10
2	1	0	0	0	0	2	0	3	0	0	0	0	2	2	3	0	2	0	0	3	0	0	3	2	0	2	2	1	0	2	0	0	0	0	1	2	1	2	7	6	2	2	0	2	2	21	15	5
1	0	2	1	1	0	2	0	0	1	0	1	1	0	0	1	0	0	2	2	2	0	0	0	1	0	0	0	0	0	0	0	1	0	0	1	0	0	1	8	0	0	0	1	3	3	15	12	0
2	0	2	0	3	0	2	1	0	0	0	0	0	0	0	3	0	1	0	1	3	0	0	2	2	0	0	2	0	0	0	2	0	2	0	3	0	0	0	8	3	0	0	0	4	2	17	7	6
3	1	2	0	2	3	0	2	3	3	0	0	0	0	0	2	0	1	0	0	0	0	0	2	0	1	1	0	1	3	1	1	0	3	0	2	0	1	0	5	4	1	8	0	4	2	24	17	15
2	1	2	1	2	2	1	2	2	2	0	1	0	2	2	0	1	1	1	1	2	1	0	2	1	1	1	1	0	1	0	3	0	2	0	2	0	0	0	6	3	1	5	1	6	2	24	18	20
1	0	1	1	1	1	2	0	0	2	0	0	0	1	0	1	1	2	1	1	1	0	0	1	0	0	0	0	0	1	0	1	0	0	0	0	0	1	0	4	3	0	2	1	5	1	16	10	0
3	1	0	0	2	2	2	1	1	1	3	2	2	0	0	3	1	0	2	1	2	0	0	2	3	1	1	2	0	1	1	3	2	1	0	2	0	1	0	14	2	1	5	3	6	0	31	19	30
2	3	0	2	3	2	3	2	3	0	0	2	0	0	1	2	3	1	0	3	3	0	0	1	3	1	1	1	0	1	0	3	1	0	0	1	0	3	0	12	2	0	5	4	6	0	29	18	0
1	2	1	1	0	2	2	1	2	2	0	2	2	2	1	0	2	1	3	1	1	0	0	1	1	0	1	1	1	2	0	1	1	2	0	1	0	1	0	8	3	0	5	3	5	1	25	13	10
2	0	1	0	3	0	2	1	1	2	0	0	0	2	0	3	0	2	1	0	3	0	0	3	1	0	2	3	1	2	0	0	0	0	0	2	0	0	0	7	6	0	4	0	4	1	22	13	30
2	0	0	0	2	1	1	1	2	1	0	1	0	0	1	1	0	2	1	1	1	0	0	1	1	1	0	1	1	0	0	1	0	1	0	1	0	0	0	7	4	0	2	0	3	0	16	15	5
2	2	2	1	0	3	2	2	3	0	0	0	0	1	1	2	0	1	0	0	0	0	0	1	2	1	2	1	1	2	0	2	0	3	0	1	0	1	0	6	3	0	8	0	4	2	23	20	40
1	0	1	0	2	1	0	1	1	2	0	0	0	0	0	2	0	0	2	1	2	0	0	0	1	0	2	1	0	2	1	1	0	1	0	0	0	0	0	7	0	1	5	0	3	1	17	10	5
1	0	0	0	3	0	3	3	0	1	0	1	0	0	0	1	0	0	0	2	0	0	0	3	2	1	0	1	0	0	0	0	0	2	0	2	0	1	0	7	3	0	1	0	4	0	15	14	30
1	1	1	0	1	1	0	0	1	0	0	0	0	1	0	1	0	1	0	0	1	0	0	1	1	0	1	1	1	1	0	1	1	1	0	0	1	0	0	3	3	0	3	1	1	1	12	5	2
2	1	1	0	3	1	1	2	2	2	2	2	1	1	0	1	1	2	1	0	3	0	0	3	2	0	1	1	0	1	0	2	0	0	0	2	0	1	1	8	5	0	3	1	5	2	24	17	50
2	1	0	0	1	1	2	1	3	1	0	2	0	0	0	2	2	0	2	1	1	0	0	0	1	0	1	1	0	1	1	1	2	1	0	0	2	1	0	10	0	1	3	4	4	0	22	15	10
2	0	0	0	2	0	0	0	2	1	0	0	0	0	0	2	1	1	0	1	1	0	0	1	0	0	0	2	2	2	0	0	2	1	0	1	0	0	0	5	4	0	2	3	1	0	15	13	4
1	0	0	0	2	0	1	1	0	0	0	0	0	0	0	1	0	3	0	0	2	0	0	2	0	0	0	2	2	0	0	1	0	2	0	0	0	0	0	2	7	0	0	0	2	0	11	14	5
0	1	0	0	0	1	0	0	0	2	2	0	0	0	0	1	0	0	2	0	2	0	0	0	0	0	0	1	0	1	0	2	0	0	0	0	0	0	0	3	0	0	2	0	4	0	9	13	10
1	0	1	0	2	1	2	1	1	1	0	1	0	1	0	0	0	1	0	1	2	0	0	2	0	0	1	0	0	0	2	2	2	1	0	1	1	1	0	3	3	2	2	2	5	1	18	17	5
0	0	0	0	2	0	1	0	0	2	0	0	0	0	0	0	0	1	0	0	1	0	0	2	0	0	0	0	0	0	0	0	0	3	0	1	0	0	0	0	3	0	0	0	3	0	6	10	2
1	2	0	2	0	3	3	2	2	1	0	3	0	0	1	0	0	1	2	3	3	0	1	2	2	3	3	0	0	3	1	1	1	2	0	2	0	2	0	11	3	1	12	1	5	0	33	15	50
0	1	1	0	1	0	1	1	1	1	0	0	0	1	1	1	0	1	0	1	2	0	0	2	1	0	0	1	0	0	0	2	0	0	0	1	1	1	0	3	3	0	0	0	4	1	11	9	20
1	0	2	0	2	0	1	2	1	0	0	0	0	1	0	0	2	2	2	0	3	0	0	2	1	0	2	2	1	1	1	2	0	1	0	1	0	1	1	4	5	1	3	2	3	3	21	13	0
0	0	1	0	1	0	3	1	0	2	2	0	0	1	0	1	0	0	2	1	3	0	0	3	1	0	0	1	0	0	0	3	0	1	0	1	0	1	1	5	3	0	0	0	8	2	18	11	5
1	1	0	0	1	0	1	1	1	1	0	0	0	0	0	1	0	0	2	1	2	0	0	0	0	1	1	1	0	0	0	1	0	0	0	0	0	1	0	5	0	0	2	0	3	0	10	14	0
2	2	0	1	2	0	1	0	1	1	0	0	0	0	0	2	0	1	1	0	1	1	0	1	0	0	1	1	0	1	1	2	0	1	0	2	0	1	0	5	2	2	2	0	4	0	15	13	2
3	3	2	1	2	3	3	2	1	2	2	3	3	2	3	3	3	2	3	3	1	0	2	2	3	0	2	1	0	1	0	1	1	1	0	2	2	1	2	18	4	0	6	4	6	4	42	19	5
0	0	0	0	0	0	0	0	0	1	0	0	0	0	1	1	0	1	0	0	0	0	0	0	0	0	1	0	0	1	0	0	0	1	0	0	0	1	0	1	1	0	2	0	1	0	5	10	3
1	1	1	0	2	0	0	0	2	0	0	1	0	0	0	2	0	2	0	0	0	0	0	2	2	0	1	1	0	1	0	1	0	2	0	0	0	2	0	6	4	0	2	0	1	1	14	14	2
1	1	1	0	1	0	0	1	0	1	1	1	1	0	0	2	2	0	1	1	1	0	0	1	1	0	1	1	0	1	0	0	1	1	0	1	2	1	1	7	1	0	2	3	1	2	16	13	2
3	2	2	0	1	3	1	3	2	3	0	2	0	1	0	3	1	3	0	1	2	0	1	2	2	3	2	2	0	3	0	2	0	0	0	2	0	2	0	11	5	0	11	1	6	2	36	21	10
2	2	2	1	2	1	1	2	1	1	2	1	1	1	1	3	2	2	2	0	1	1	2	1	2	1	1	0	3	2	0	1	0	0	0	1	3	1	1	10	6	1	5	2	3	3	30	18	20
1	0	2	1	0	1	1	0	1	0	0	0	0	0	0	1	0	1	0	0	1	0	0	1	1	0	0	0	1	0	0	0	0	0	0	1	0	0	0	3	3	0	1	0	1	2	10	8	0
2	2	1	1	2	1	1	1	1	1	0	1	1	0	1	2	1	2	1	1	2	0	1	3	1	0	2	1	1	2	1	2	1	1	0	1	0	2	0	8	6	1	5	2	4	1	27	15	5
0	0	0	1	1	0	0	0	1	1	0	0	0	0	0	0	0	2	0	0	1	0	0	1	1	0	1	1	2	1	0	0	0	1	0	0	0	1	1	1	5	0	2	0	1	1	10	11	5
2	0	2	2	3	0	1	0	2	0	0	0	0	2	0	1	0	0	1	0	0	0	0	2	0	0	0	0	0	0	0	2	0	2	0	1	0	0	0	4	2	0	0	0	3	2	11	14	5
2	2	2	0	3	0	3	2	3	3	2	2	1	2	2	2	0	2	2	1	3	0	0	2	2	1	1	0	0	1	1	3	1	2	2	2	3	1	1	11	4	3	3	1	9	3	34	16	10
2	2	0	1	0	1	1	2	3	2	2	1	0	1	0	1	0	0	2	0	1	0	0	0	2	0	1	1	0	2	0	1	2	0	0	1	0	1	0	8	0	0	4	2	4	0	18	17	5
2	2	2	0	2	2	2	2	2	2	0	0	0	0	0	2	0	2	2	0	2	0	0	2	1	0	1	1	0	1	0	3	0	2	0	2	0	2	2	7	4	0	4	0	7	4	26	16	5
2	2	0	1	2	1	2	2	3	3	3	2	1	0	0	2	0	0	2	1	3	1	0	0	2	1	0	2	1	0	0	3	0	0	0	2	0	1	0	11	1	1	2	0	8	0	23	22	10
3	2	2	0	2	1	0	2	2	2	2	2	3	1	0	3	0	0	3	3	2	1	0	0	3	0	0	0	0	2	1	2	0	0	0	1	0	0	2	17	0	2	3	0	4	4	30	21	2
2	1	0	1	2	1	1	2	0	2	0	1	0	0	0	1	1	0	3	1	2	0	0	0	1	0	0	2	0	0	0	2	1	0	0	2	1	2	0	9	0	0	1	2	5	0	17	11	2
3	2	3	2	2	2	2	2	3	2	2	2	2	0	0	3	2	2	3	3	3	1	1	2	3	1	2	1	1	2	0	2	1	1	0	2	1	0	2	17	5	1	7	3	6	5	44	20	30
1	1	0	0	0	0	0	0	1	0	0	1	0	1	2	2	0	3	1	0	2	0	0	2	1	1	1	2	1	0	0	1	0	1	0	0	1	1	0	6	6	0	2	0	1	0	15	15	10
3	0	3	2	1	2	2	1	2	3	0	0	0	2	0	1	0	0	0	0	2	0	0	3	2	0	0	2	0	1	0	1	0	2	0	1	0	0	0	6	3	0	3	0	6	3	21	16	0.8
2	0	0	0	0	2	1	1	2	0	1	1	0	3	1	3	1	1	2	0	1	0	0	2	2	0	0	0	3	2	0	0	1	2	0	0	2	0	0	10	6	0	4	2	1	0	23	15	5
1	2	2	1	2	2	2	1	2	2	2	1	0	2	1	2	1	3	1	0	2	1	0	2	2	0	2	2	1	2	1	2	1	2	0	2	1	1	2	7	6	2	6	2	6	4	33	17	40
1	1	2	2	0	2	2	1	0	2	0	0	0	0	0	2	1	0	2	0	2	0	0	2	2	1	2	1	0	2	0	2	2	0	0	1	2	1	1	7	2	0	7	3	6	3	28	15	10
2	1	3	0	0	2	0	3	0	0	0	1	2	0	0	2	0	0	1	1	3	0	3	3	2	2	1	3	0	2	0	0	0	2	0	0	0	2	0	9	3	0	7	0	0	3	22	22	20
1	1	1	1	1	1	2	1	2	1	1	1	0	1	0	2	1	1	1	1	2	0	1	2	2	0	1	1	0	1	0	1	1	2	0	2	2	1	1	8	3	0	3	2	4	2	22	16	15
3	2	0	1	2	2	2	1	3	2	2	3	0	0	1	3	1	0	3	3	3	1	0	0	2	0	3	1	1	2	2	2	3	1	0	2	2	3	0	17	1	3	7	4	6	0	38	11	10
2	1	2	1	3	0	2	1	3	1	1	0	1	1	1	2	0	2	2	1	2	0	0	2	3	1	0	2	2	1	1	2	2	2	0	2	0	1	0	10	6	1	2	2	5	2	28	22	25
3	2	3	1	2	2	3	2	3	1	1	2	2	2	1	2	0	3	1	1	2	0	0	3	2	1	3	1	2	0	2	2	1	3	0	2	1	1	3	11	8	2	6	1	6	6	40	17	40
1	1	0	2	0	2	1	1	3	2	1	1	1	2	0	0	0	0	0	1	2	1	2	1	0	3	2	1	1	3	2	2	1	2	0	0	0	0	0	3	2	3	10	1	5	0	24	23	40
3	0	0	1	1	1	2	0	0	1	1	0	1	1	0	1	0	0	2	1	2	0	0	2	1	0	0	2	0	1	0	2	0	1	0	1	0	0	0	8	2	0	2	0	5	0	17	17	3
3	2	1	1	2	2	2	1	3	2	0	0	0	0	0	3	0	0	2	2	0	0	0	0	3	0	0	2	0	2	0	0	0	0	0	1	1	0	0	13	0	0	4	0	4	1	22	18	5
1	0	0	0	1	0	1	0	3	1	0	0	0	0	0	0	0	0	2	0	0	0	0	1	0	0	0	0	0	0	0	0	0	3	0	0	0	0	0	3	1	0	0	0	2	0	6	7	5
1	0	0	2	2	0	2	2	3	2	1	1	0	1	1	3	2	0	2	2	3	0	0	2	2	0	1	2	0	1	0	2	0	0	0	2	0	1	2	11	2	0	2	2	6	2	25	18	50
0	0	0	1	1	2	0	0	0	0	0	0	0	0	0	0	0	2	0	0	2	0	0	1	0	1	0	0	0	1	0	0	0	0	0	3	0	0	0	0	3	0	4	0	0	0	7	20	5
2	0	2	2	0	2	1	1	1	1	1	1	0	0	0	2	0	1	3	2	3	0	1	2	2	0	2	1	1	2	0	2	0	1	0	1	1	1	3	12	4	0	6	0	4	5	31	16	10
1	2	0	0	1	2	1	0	1	1	0	0	0	0	0	2	0	2	1	0	2	0	0	2	1	2	0	2	0	2	0	1	1	2	0	1	0	0	0	5	4	0	6	1	3	0	19	14	2
2	0	3	0	2	1	0	0	0	1	1	0	2	1	1	2	0	0	0	1	1	0	1	3	3	0	0	1	1	0	0	1	0	2	0	1	0	0	0	8	4	0	1	0	2	3	18	9	0
0	0	0	0	0	0	1	1	0	1	0	0	0	0	0	0	0	1	0	0	2	0	0	1	1	0	0	0	0	1	0	0	0	1	0	1	0	0	0	1	2	0	1	0	2	0	6	13	1.5
