# Supplementary material for: Development and Validation of the RAFFLE: A Measure of Reasons and Facilitators for Loot Box Engagement
Source: J Clin Med. 2021 Dec 18;10(24):5949. doi: 10.3390/jcm10245949 (PMC8707097; doi:10.3390/jcm10245949)
Supplement: Supplementary file 1 [file jcm-10-05949-s001.zip › Table S4 Data used in Study 3.xlsx]

## Sheet: Sheet1
RLI_Score	Total_RAFFLE_Score	Enhancement_subscale_score	Progression_subscale_score	Social_pressure_subscale_score	Distraction_compulsion_subscale_score	Altruism_subscale_score	Fear_of_missing_out_subscale_score	Resale_subscale_score	Monthly_loot_box_spend	Motive: Visual Appeal	Motive: Feel Good	Motive: Personally Valuable	Motive: Fun	Motive: Get something good or rare	Motive: Excitement	Motive: Get past a hurdle	Motive: Get items that are useful / give advantage	Motive: Had failure / defeat	Motive: Friends encourage / pressure	Motive: So don't get shamed	Motive: Don't want to feel left out	Motive: Bored	Motive: Can't stop	Motive: Get an urge	Motive: Take mind off	Motive: Good causes	Motive: Support developer	Motive: In-game event	Motive: Get items I'm collecting	Motive: Not to miss limited time offers	Motive: To get gaming currency	Motive: To make real money
7	20	9	4	0	1	0	4	2	0	1	0	0	2	3	3	2	1	1	0	0	0	1	0	0	0	0	0	1	1	2	2	0
14	22	9	1	3	5	2	1	1	5	1	1	2	1	2	2	0	1	0	2	0	1	2	1	1	1	0	2	0	1	0	1	0
1	7	2	3	0	1	0	1	0	1.99	0	0	0	1	0	1	1	1	1	0	0	0	0	0	1	0	0	0	1	0	0	0	0
15	26	9	3	1	5	2	4	2	15	1	0	2	1	3	2	1	1	1	0	0	1	1	1	2	1	1	1	1	2	1	1	1
14	27	11	6	2	5	0	3	0	400	1	2	1	2	3	2	1	3	2	0	1	1	1	1	1	2	0	0	0	1	2	0	0
1	13	3	5	0	0	1	4	0	5	0	0	1	0	1	1	2	3	0	0	0	0	0	0	0	0	0	1	2	1	1	0	0
10	11	3	2	0	1	0	5	0	2	0	0	0	1	1	1	0	2	0	0	0	0	0	0	1	0	0	0	1	2	2	0	0
10	24	11	6	0	4	0	3	0	10	1	2	1	3	2	2	2	2	2	0	0	0	1	1	1	1	0	0	1	1	1	0	0
3	4	2	0	0	0	1	1	0	0	1	0	0	0	1	0	0	0	0	0	0	0	0	0	0	0	0	1	1	0	0	0	0
15	36	15	6	1	6	0	6	2	5	3	2	3	1	3	3	3	3	0	0	0	1	2	0	2	2	0	0	2	2	2	1	1
17	32	4	8	3	9	2	6	0	100	1	1	0	0	1	1	3	2	3	0	1	2	0	3	3	3	0	2	2	1	3	0	0
9	20	8	5	0	3	0	3	1	5	2	0	1	1	2	2	2	2	1	0	0	0	1	0	1	1	0	0	1	1	1	1	0
15	30	12	7	0	4	2	5	0	15	1	1	2	2	3	3	2	3	2	0	0	0	1	0	1	2	0	2	0	2	3	0	0
14	33	12	6	2	5	2	6	0	35	1	2	1	2	3	3	2	2	2	1	0	1	1	1	2	1	1	1	2	2	2	0	0
17	37	16	7	3	2	1	7	1	70	3	2	2	3	3	3	2	3	2	0	1	2	0	0	1	1	0	1	2	2	3	1	0
5	8	1	4	0	1	0	2	0	10	0	0	0	1	0	0	3	1	0	0	0	0	0	0	0	1	0	0	2	0	0	0	0
14	23	11	4	0	3	1	4	0	80	1	1	1	2	3	3	1	2	1	0	0	0	0	0	3	0	0	1	1	2	1	0	0
19	36	14	2	4	3	3	5	5	20	2	3	2	1	3	3	1	1	0	2	0	2	1	0	1	1	0	3	2	1	2	3	2
10	30	11	6	0	4	1	6	2	0	3	0	1	2	3	2	2	3	1	0	0	0	1	0	2	1	0	1	2	2	2	2	0
6	24	10	3	0	1	3	5	2	15	0	1	2	2	2	3	1	2	0	0	0	0	1	0	0	0	1	2	2	2	1	2	0
0	1	0	1	0	0	0	0	0	2	0	0	0	0	0	0	1	0	0	0	0	0	0	0	0	0	0	0	0	0	0	0	0
14	33	12	7	1	5	2	4	2	3	2	1	3	2	2	2	3	3	1	0	0	1	1	1	2	1	1	1	1	2	1	1	1
14	35	16	5	1	4	2	7	0	10	3	2	3	2	3	3	2	3	0	0	0	1	1	1	1	1	1	1	2	2	3	0	0
17	37	15	5	0	7	3	6	1	20	2	2	2	3	3	3	2	2	1	0	0	0	2	2	2	1	1	2	2	2	2	1	0
13	28	14	1	2	1	2	7	1	10	3	0	2	3	3	3	0	1	0	2	0	0	0	0	1	0	1	1	2	3	2	0	1
11	22	8	3	0	3	1	6	1	25	2	1	0	2	1	2	1	1	1	0	0	0	0	1	1	1	0	1	2	2	2	1	0
11	26	9	7	0	6	1	2	1	20	0	0	0	3	3	3	2	3	2	0	0	0	2	0	2	2	0	1	0	1	1	1	0
6	6	2	2	0	1	0	1	0	10	0	0	1	0	0	1	1	1	0	0	0	0	1	0	0	0	0	0	1	0	0	0	0
10	24	12	0	0	3	3	3	3	0	2	1	2	2	3	2	0	0	0	0	0	0	1	1	1	0	1	2	0	2	1	2	1
16	33	14	4	1	5	1	6	2	10	2	2	2	2	3	3	1	2	1	0	0	1	1	0	2	2	0	1	2	2	2	1	1
13	30	13	5	0	4	3	3	2	5	2	2	2	3	2	2	2	2	1	0	0	0	1	1	1	1	1	2	1	1	1	1	1
13	35	13	6	2	6	1	6	1	10	1	2	1	3	3	3	2	3	1	2	0	0	2	1	2	1	0	1	2	2	2	1	0
13	25	9	5	1	4	2	4	0	0	2	1	1	1	2	2	2	2	1	0	0	1	2	0	1	1	1	1	1	1	2	0	0
1	14	6	0	0	2	1	3	2	1	1	1	1	1	1	1	0	0	0	0	0	0	1	0	0	1	0	1	1	1	1	1	1
14	32	9	8	0	6	1	6	2	3.99	1	0	2	2	2	2	3	3	2	0	0	0	1	2	2	1	0	1	2	2	2	1	1
14	27	11	5	1	2	2	4	2	5	2	2	1	2	2	2	2	2	1	1	0	0	1	0	0	1	1	1	1	1	2	1	1
1	14	4	5	0	2	0	2	1	4	1	1	1	0	1	0	2	3	0	0	0	0	1	0	0	1	0	0	2	0	0	1	0
2	14	5	4	0	0	1	3	1	0	0	0	1	2	1	1	2	2	0	0	0	0	0	0	0	0	1	0	1	1	1	1	0
19	41	13	6	2	9	2	7	2	30	3	2	1	3	3	1	3	3	0	2	0	0	2	3	1	3	1	1	3	1	3	2	0
14	35	12	6	0	8	2	7	0	10	0	1	2	3	3	3	3	2	1	0	0	0	3	1	2	2	1	1	2	2	3	0	0
9	21	8	7	0	1	1	4	0	3	1	0	0	3	1	3	2	3	2	0	0	0	0	0	1	0	0	1	2	1	1	0	0
12	29	11	4	0	5	1	6	2	40	1	1	1	2	3	3	0	3	1	0	0	0	2	1	2	0	0	1	2	2	2	2	0
15	23	11	5	0	2	0	5	0	5	2	0	1	2	3	3	1	2	2	0	0	0	0	0	1	1	0	0	1	2	2	0	0
0	17	6	6	0	1	0	3	1	5	0	0	0	2	3	1	3	2	1	0	0	0	0	0	1	0	0	0	1	1	1	1	0
2	17	8	0	0	1	1	7	0	10	3	0	2	1	1	1	0	0	0	0	0	0	0	0	0	1	0	1	2	3	2	0	0
13	12	9	1	0	2	0	0	0	5	1	1	1	2	2	2	0	1	0	0	0	0	1	0	1	0	0	0	0	0	0	0	0
13	19	6	5	2	4	1	1	0	5	1	0	0	1	2	2	2	2	1	0	0	2	0	1	1	2	1	0	1	0	0	0	0
14	26	4	6	6	3	0	5	2	40	0	0	1	1	2	0	2	3	1	2	2	2	0	1	1	1	0	0	2	1	2	2	0
11	20	4	6	0	3	0	3	4	5	0	0	3	1	0	0	3	2	1	0	0	0	1	0	1	1	0	0	1	1	1	2	2
12	24	6	5	4	3	1	2	3	5	1	1	1	1	1	1	2	2	1	2	1	1	0	1	1	1	0	1	1	0	1	2	1
3	27	11	8	1	2	0	4	1	50	1	0	1	3	3	3	3	3	2	0	0	1	1	0	1	0	0	0	2	2	0	1	0
14	25	11	3	0	5	0	4	2	25	2	1	2	2	2	2	1	2	0	0	0	0	1	1	2	1	0	0	1	1	2	2	0
5	25	6	7	1	3	3	4	1	15	1	0	1	1	2	1	3	2	2	0	0	1	1	0	1	1	1	2	2	1	1	1	0
5	26	8	7	0	2	2	6	1	5	2	0	1	2	2	1	3	3	1	0	0	0	1	0	1	0	2	0	2	2	2	1	0
15	41	17	8	0	2	1	7	6	25	3	2	3	3	3	3	3	3	2	0	0	0	0	0	2	0	0	1	2	2	3	3	3
7	20	6	7	0	2	0	3	2	5	1	0	0	2	2	1	3	3	1	0	0	0	0	0	1	1	0	0	1	1	1	2	0
6	18	6	5	0	2	2	3	0	50	2	1	1	1	0	1	2	1	2	0	0	0	1	0	1	0	1	1	1	1	1	0	0
6	17	6	3	1	2	1	4	0	5	1	0	0	2	2	1	1	2	0	0	0	1	0	0	1	1	0	1	1	2	1	0	0
16	24	8	6	0	2	1	5	2	25	1	0	1	2	1	3	2	3	1	0	0	0	0	0	1	1	0	1	1	2	2	2	0
14	27	15	3	0	0	3	4	2	2	2	3	1	3	3	3	1	1	1	0	0	0	0	0	0	0	1	2	1	2	1	0	2
17	42	16	7	2	5	3	5	4	25	3	2	2	3	3	3	2	3	2	1	0	1	1	1	1	2	2	1	1	2	2	2	2
9	16	7	5	0	0	0	4	0	25	1	1	1	1	1	2	2	2	1	0	0	0	0	0	0	0	0	0	0	2	2	0	0
17	35	13	7	1	5	1	6	2	10	3	0	1	3	3	3	2	3	2	0	0	1	2	1	1	1	0	1	2	2	2	2	0
4	23	7	6	0	2	2	4	2	5	2	0	0	3	1	1	3	1	2	0	0	0	1	0	1	0	1	1	2	1	1	1	1
8	18	13	0	0	1	0	0	4	5	3	2	2	0	3	3	0	0	0	0	0	0	0	0	0	1	0	0	0	0	0	2	2
12	25	15	4	0	4	0	2	0	20	2	2	2	3	3	3	1	2	1	0	0	0	2	0	1	1	0	0	1	0	1	0	0
9	12	5	0	1	3	0	3	0	3	2	0	1	1	1	0	0	0	0	1	0	0	2	1	0	0	0	0	2	0	1	0	0
15	17	3	3	0	4	3	2	2	35	0	0	0	1	1	1	2	1	0	0	0	0	1	0	1	2	1	2	2	0	0	0	2
14	32	10	6	1	5	1	6	3	25	2	0	0	2	3	3	2	2	2	1	0	0	2	1	1	1	0	1	2	2	2	2	1
4	17	9	2	0	2	0	1	3	5	1	0	1	2	2	3	0	2	0	0	0	0	0	0	1	1	0	0	0	1	0	3	0
13	16	6	6	0	0	0	3	1	15	1	0	0	2	1	2	2	2	2	0	0	0	0	0	0	0	0	0	1	1	1	1	0
7	16	7	5	0	1	1	2	0	5	1	0	1	1	2	2	2	2	1	0	0	0	0	0	0	1	0	1	1	1	0	0	0
0	9	0	7	0	1	0	1	0	5	0	0	0	0	0	0	3	3	1	0	0	0	1	0	0	0	0	0	1	0	0	0	0
10	40	12	6	2	10	0	8	2	10	1	1	3	3	2	2	3	2	1	0	2	0	2	3	3	2	0	0	2	3	3	2	0
15	26	7	6	0	6	2	4	1	5	1	1	1	2	1	1	2	2	2	0	0	0	2	1	1	2	2	0	2	1	1	1	0
9	35	12	7	0	5	0	8	3	5	2	0	1	3	3	3	3	3	1	0	0	0	1	2	2	0	0	0	3	2	3	3	0
19	48	12	7	3	10	2	8	6	30	2	2	1	1	3	3	2	3	2	1	0	2	3	3	3	1	1	1	2	3	3	3	3
13	22	8	3	1	4	0	3	3	20	1	1	1	1	2	2	1	1	1	0	0	1	1	1	1	1	0	0	1	1	1	1	2
15	28	10	8	0	6	0	4	0	0	1	0	1	2	3	3	3	3	2	0	0	0	1	2	2	1	0	0	2	1	1	0	0
17	38	13	6	2	6	2	5	4	40	2	1	1	3	3	3	1	3	2	2	0	0	2	1	2	1	1	1	1	2	2	2	2
9	29	13	6	0	4	0	5	1	10	1	2	1	3	3	3	2	3	1	0	0	0	1	0	1	2	0	0	2	2	1	1	0
19	39	14	8	0	3	4	9	1	10	2	1	2	3	3	3	3	3	2	0	0	0	1	0	2	0	2	2	3	3	3	1	0
8	28	9	8	0	6	0	5	0	100	1	0	2	2	2	2	3	3	2	0	0	0	2	1	2	1	0	0	1	2	2	0	0
15	38	15	4	6	7	0	3	3	20	3	3	2	3	2	2	1	2	1	2	2	2	1	1	2	3	0	0	0	2	1	1	2
14	31	12	6	0	5	0	6	2	5	1	2	0	3	3	3	2	2	2	0	0	0	1	1	2	1	0	0	1	3	2	2	0
14	39	15	6	4	4	3	5	2	40	1	3	2	3	3	3	2	3	1	2	0	2	1	1	1	1	1	2	2	1	2	2	0
8	16	6	3	0	0	1	6	0	10	2	0	0	3	0	1	3	0	0	0	0	0	0	0	0	0	1	0	2	3	1	0	0
12	39	13	4	6	7	2	7	0	20	3	2	1	3	3	1	1	2	1	1	2	3	1	2	3	1	0	2	1	3	3	0	0
14	28	13	2	0	5	2	6	0	15	3	1	2	2	2	3	1	1	0	0	0	0	1	1	2	1	1	1	2	2	2	0	0
15	39	14	7	1	6	2	7	2	20	3	1	1	3	3	3	3	3	1	0	0	1	2	2	2	0	1	1	2	2	3	2	0
0	11	0	9	0	2	0	0	0	0	0	0	0	0	0	0	3	3	3	0	0	0	0	2	0	0	0	0	0	0	0	0	0
3	28	13	6	1	0	2	4	2	100	3	2	2	1	3	2	2	3	1	0	0	1	0	0	0	0	1	1	1	2	1	1	1
13	28	7	8	4	5	0	3	1	10	1	0	1	1	2	2	3	3	2	1	1	2	1	1	2	1	0	0	0	1	2	1	0
12	35	14	5	0	6	1	6	3	10	3	1	1	3	3	3	2	2	1	0	0	0	2	0	2	2	0	1	2	2	2	3	0
11	27	11	3	2	4	1	5	1	10	1	1	1	2	3	3	1	2	0	1	0	1	2	0	1	1	0	1	1	2	2	1	0
1	4	2	0	0	0	2	0	0	3	1	0	0	1	0	0	0	0	0	0	0	0	0	0	0	0	1	1	0	0	0	0	0
11	20	6	6	0	2	1	4	1	1	0	0	2	2	1	1	2	3	1	0	0	0	1	0	0	1	0	1	2	0	2	1	0
8	25	15	3	0	2	1	2	2	4	2	2	3	3	2	3	1	2	0	0	0	0	0	0	0	2	1	0	0	1	1	1	1
8	19	6	7	0	0	0	5	1	5	0	0	1	1	2	2	3	3	1	0	0	0	0	0	0	0	0	0	1	2	2	1	0
9	16	5	5	0	1	2	3	0	15	0	0	0	2	1	2	2	2	1	0	0	0	0	0	0	1	1	1	1	1	1	0	0
13	33	15	4	3	5	0	5	1	20	2	3	3	1	3	3	1	2	1	0	1	2	0	1	2	2	0	0	2	1	2	1	0
4	24	9	6	0	3	0	3	3	3.99	0	0	1	3	3	2	3	3	0	0	0	0	1	1	0	1	0	0	2	0	1	3	0
12	23	6	3	3	4	2	3	2	10	1	1	1	1	1	1	1	1	1	1	1	1	1	1	1	1	1	1	1	1	1	1	1
6	19	8	4	0	2	2	2	1	5	1	1	1	2	2	1	2	1	1	0	0	0	2	0	0	0	1	1	1	1	0	0	1
16	35	14	6	0	3	5	7	0	6	2	2	2	2	3	3	2	2	2	0	0	0	1	1	1	0	3	2	2	3	2	0	0
7	23	11	6	0	1	3	0	2	20	2	2	1	1	3	2	3	3	0	0	0	0	1	0	0	0	1	2	0	0	0	2	0
5	13	6	5	0	1	0	1	0	1	1	0	1	1	2	1	2	2	1	0	0	0	0	0	1	0	0	0	0	1	0	0	0
0	6	0	6	0	0	0	0	0	0	0	0	0	0	0	0	3	0	3	0	0	0	0	0	0	0	0	0	0	0	0	0	0
7	10	5	2	0	2	0	1	0	10	1	0	0	2	1	1	1	1	0	0	0	0	1	0	1	0	0	0	0	1	0	0	0
14	21	10	5	0	2	0	4	0	5	1	1	1	2	3	2	2	2	1	0	0	0	1	0	0	1	0	0	1	2	1	0	0
1	4	1	2	0	1	0	0	0	5	0	0	0	1	0	0	1	1	0	0	0	0	1	0	0	0	0	0	0	0	0	0	0
12	28	12	8	0	4	1	3	0	20	2	0	1	3	3	3	3	3	2	0	0	0	2	0	0	2	0	1	1	1	1	0	0
11	23	11	3	1	3	1	4	0	5	2	1	2	2	2	2	1	2	0	0	0	1	1	1	1	0	0	1	1	2	1	0	0
12	16	7	5	0	1	1	2	0	10	1	0	1	2	1	2	2	2	1	0	0	0	0	0	1	0	0	1	1	0	1	0	0
9	12	6	0	0	1	0	5	0	2	2	0	0	1	2	1	0	0	0	0	0	0	1	0	0	0	0	0	1	2	2	0	0
8	23	6	8	0	2	0	5	2	20	0	0	0	2	2	2	3	3	2	0	0	0	0	1	1	0	0	0	1	2	2	2	0
7	10	4	2	0	1	1	2	0	1	1	0	0	1	1	1	1	1	0	0	0	0	1	0	0	0	1	0	0	1	1	0	0
14	32	13	4	0	5	2	5	3	20	2	2	1	3	2	3	1	2	1	0	0	0	1	1	2	1	1	1	1	2	2	2	1
10	31	12	5	0	5	3	6	0	20	1	1	2	2	3	3	1	3	1	0	0	0	2	0	1	2	1	2	2	3	1	0	0
2	11	5	5	0	0	0	1	0	1	1	0	0	3	1	0	2	3	0	0	0	0	0	0	0	0	0	0	0	1	0	0	0
12	37	10	6	2	7	1	7	4	1	0	1	2	3	2	2	3	3	0	0	0	2	3	0	2	2	1	0	2	3	2	3	1
18	31	14	2	1	8	0	6	0	20	3	1	2	2	3	3	0	2	0	0	0	1	2	2	3	1	0	0	1	2	3	0	0
7	20	5	6	0	4	0	5	0	5	0	0	0	2	1	2	3	3	0	0	0	0	1	0	1	2	0	0	2	1	2	0	0
15	33	13	4	5	3	2	4	2	5	2	0	2	3	3	3	1	2	1	2	1	2	1	0	2	0	0	2	2	1	1	2	0
8	18	5	4	0	1	2	3	3	2	1	0	0	1	1	2	1	2	1	0	0	0	1	0	0	0	1	1	0	1	2	1	2
12	29	13	1	2	3	2	7	1	10	3	2	2	3	1	2	0	1	0	2	0	0	1	0	1	1	1	1	3	2	2	1	0
4	26	12	8	0	3	2	1	0	50	3	0	0	3	3	3	3	3	2	0	0	0	3	0	0	0	1	1	0	1	0	0	0
5	15	5	5	0	1	0	3	1	5	0	0	0	2	1	2	3	2	0	0	0	0	1	0	0	0	0	0	1	1	1	1	0
11	35	12	8	0	3	2	6	4	50	1	2	2	2	3	2	3	3	2	0	0	0	1	1	1	0	1	1	2	2	2	3	1
13	32	14	5	0	2	4	7	0	10	1	2	3	3	2	3	1	3	1	0	0	0	0	0	1	1	2	2	3	2	2	0	0
11	27	8	6	1	2	2	6	2	7	1	1	2	1	2	1	2	2	2	0	0	1	1	0	0	1	1	1	2	2	2	2	0
14	27	9	5	2	4	1	6	0	10	1	0	2	2	3	1	2	2	1	0	0	2	1	0	1	2	0	1	2	2	2	0	0
15	31	10	5	1	6	2	5	2	10	1	1	2	2	2	2	2	2	1	0	0	1	2	1	1	2	1	1	1	2	2	1	1
14	24	10	6	0	5	0	2	1	50	2	1	1	2	2	2	2	3	1	0	0	0	1	1	2	1	0	0	1	1	0	0	1
5	25	9	5	0	2	4	4	1	1.99	1	1	2	2	2	1	2	2	1	0	0	0	1	0	0	1	2	2	2	1	1	1	0
8	24	14	3	0	2	0	3	2	40	2	1	2	3	3	3	1	2	0	0	0	0	1	0	1	0	0	0	1	1	1	2	0
13	23	7	7	0	5	0	2	2	100	0	0	1	2	2	2	3	3	1	0	0	0	2	1	1	1	0	0	1	1	0	2	0
11	29	12	5	2	6	0	3	1	40	3	1	2	2	2	2	2	2	1	0	1	1	2	1	2	1	0	0	0	1	2	1	0
9	22	6	5	2	1	2	4	2	20	1	0	0	3	1	1	3	1	1	0	1	1	1	0	0	0	1	1	1	2	1	1	1
13	33	12	5	0	6	4	4	2	30	1	1	1	3	3	3	1	3	1	0	0	0	2	0	3	1	2	2	0	2	2	2	0
15	32	14	5	1	8	0	3	1	10	3	1	1	3	3	3	2	2	1	0	0	1	2	2	2	2	0	0	1	1	1	1	0
8	16	4	6	0	1	2	3	0	10	1	0	0	1	1	1	2	2	2	0	0	0	0	0	0	1	0	2	1	1	1	0	0
3	35	16	6	0	1	4	4	4	50	3	3	2	3	3	2	3	3	0	0	0	0	0	0	0	1	2	2	1	1	2	2	2
12	20	1	8	0	7	0	4	0	60	1	0	0	0	0	0	3	3	2	0	0	0	2	2	2	1	0	0	1	1	2	0	0
14	26	8	4	2	1	1	5	5	120	1	0	1	2	2	2	2	2	0	1	0	1	0	0	1	0	0	1	2	1	2	2	3
12	21	9	5	0	0	1	3	3	10	1	1	1	2	2	2	2	2	1	0	0	0	0	0	0	0	1	0	1	1	1	2	1
8	22	11	3	0	1	3	3	1	20	2	1	2	2	2	2	2	1	0	0	0	0	1	0	0	0	1	2	1	1	1	0	1
17	24	10	8	0	3	0	3	0	20	0	0	1	3	3	3	3	3	2	0	0	0	1	0	0	2	0	0	0	1	2	0	0
7	25	11	6	0	2	0	4	2	8	1	1	2	2	3	2	3	3	0	0	0	0	1	0	0	1	0	0	1	2	1	1	1
9	24	13	2	0	5	1	3	0	10	2	1	2	3	2	3	1	1	0	0	0	0	2	0	2	1	0	1	1	0	2	0	0
17	49	16	6	6	8	2	8	3	25	3	2	3	3	2	3	1	3	2	1	2	3	3	1	2	2	0	2	3	2	3	3	0
14	29	10	3	2	6	0	6	2	2	0	1	2	2	2	3	1	2	0	1	0	1	2	0	2	2	0	0	2	2	2	1	1
8	30	10	7	0	8	0	5	0	3	2	1	1	2	2	2	3	2	2	0	0	0	2	2	1	3	0	0	1	2	2	0	0
14	37	16	6	0	5	3	4	3	15	2	3	3	2	3	3	3	2	1	0	0	0	1	1	1	2	2	1	2	1	1	2	1
3	15	9	0	0	1	3	2	0	0	1	0	3	2	1	2	0	0	0	0	0	0	0	0	0	1	0	3	0	2	0	0	0
5	36	15	8	0	4	2	6	1	35	3	2	1	3	3	3	3	3	2	0	0	0	1	0	1	2	0	2	3	1	2	1	0
14	25	9	5	0	2	2	4	3	20	1	1	1	2	2	2	2	2	1	0	0	0	1	0	1	0	1	1	1	1	2	2	1
13	32	9	8	2	4	2	5	2	5	1	1	2	2	2	1	3	3	2	1	0	1	1	1	1	1	1	1	1	2	2	2	0
8	22	7	0	0	3	4	6	2	5	1	0	1	2	1	2	0	0	0	0	0	0	1	0	1	1	2	2	2	2	2	1	1
12	35	9	5	3	4	4	7	3	50	2	2	1	1	2	1	2	2	1	1	1	1	0	1	2	1	2	2	3	3	1	2	1
8	25	8	4	2	6	0	5	0	3	1	0	1	2	2	2	2	1	1	2	0	0	3	2	0	1	0	0	2	1	2	0	0
12	30	11	5	2	4	0	4	4	5	2	0	1	2	3	3	2	2	1	0	0	2	1	1	1	1	0	0	1	1	2	2	2
14	31	9	8	0	6	1	6	1	5	0	2	1	2	2	2	3	3	2	0	0	0	1	1	2	2	0	1	2	2	2	1	0
7	17	10	0	0	2	0	3	2	350	2	1	1	3	2	1	0	0	0	0	0	0	1	0	1	0	0	0	0	1	2	1	1
6	9	0	7	0	0	0	2	0	0	0	0	0	0	0	0	3	3	1	0	0	0	0	0	0	0	0	0	1	0	1	0	0
7	14	7	0	2	2	2	1	0	0	1	0	1	2	1	2	0	0	0	2	0	0	1	0	0	1	1	1	1	0	0	0	0
5	10	0	8	0	0	1	1	0	2	0	0	0	0	0	0	3	3	2	0	0	0	0	0	0	0	0	1	1	0	0	0	0
10	34	7	5	6	6	4	6	0	0	1	2	2	0	1	1	1	3	1	2	2	2	3	1	0	2	2	2	2	2	2	0	0
16	27	12	0	3	3	2	7	0	20	2	2	1	2	3	2	0	0	0	1	0	2	1	0	1	1	1	1	2	2	3	0	0
2	16	8	0	0	1	3	2	2	5	1	0	0	3	2	2	0	0	0	0	0	0	0	0	1	0	3	0	1	1	0	2	0
13	30	14	6	0	3	0	6	1	20	2	1	2	3	3	3	2	3	1	0	0	0	0	0	2	1	0	0	1	3	2	1	0
4	17	6	8	0	2	0	1	0	1	0	1	2	2	0	1	2	3	3	0	0	0	1	0	0	1	0	0	0	0	1	0	0
13	35	13	4	1	5	2	9	1	10	2	1	2	3	3	2	1	2	1	0	0	1	2	1	2	0	1	1	3	3	3	1	0
14	19	4	7	0	1	2	4	1	0	0	0	0	2	1	1	3	1	3	0	0	0	1	0	0	0	1	1	1	1	2	1	0
12	19	8	3	0	3	0	5	0	30	1	1	1	2	1	2	2	1	0	0	0	0	1	0	1	1	0	0	1	2	2	0	0
13	30	7	8	2	6	0	4	3	5	0	0	0	2	3	2	3	3	2	0	0	2	2	1	2	1	0	0	1	2	1	3	0
15	37	11	7	1	9	1	6	2	100	1	1	1	2	3	3	2	3	2	0	0	1	2	2	3	2	1	0	2	2	2	2	0
17	55	17	5	8	10	4	6	5	40	3	3	2	3	3	3	1	2	2	2	3	3	3	1	3	3	1	3	2	1	3	2	3
5	24	11	0	2	1	4	5	1	5	3	0	1	3	3	1	0	0	0	1	0	1	1	0	0	0	2	2	1	2	2	1	0
14	31	8	6	5	3	1	4	4	100	1	1	1	1	2	2	2	2	2	2	1	2	0	1	1	1	0	1	1	1	2	2	2
8	25	12	1	3	3	1	4	1	3	2	2	1	2	2	3	0	1	0	1	1	1	1	0	1	1	0	1	1	1	2	1	0
9	16	8	0	1	0	2	5	0	20	3	2	1	0	1	1	0	0	0	0	0	1	0	0	0	0	1	1	1	2	2	0	0
9	27	12	3	2	5	1	4	0	5	2	1	1	3	2	3	1	1	1	1	0	1	2	0	1	2	0	1	1	1	2	0	0
15	28	13	1	3	3	2	6	0	10	3	2	2	2	2	2	0	0	1	1	0	2	1	0	1	1	1	1	2	2	2	0	0
4	14	6	0	0	4	1	3	0	0	1	1	1	1	1	1	0	0	0	0	0	0	1	1	1	1	0	1	1	1	1	0	0
12	30	12	0	5	7	2	4	0	5	2	2	2	2	2	2	0	0	0	2	1	2	1	3	2	1	1	1	2	1	1	0	0
12	30	9	8	0	7	0	5	1	15	1	1	1	2	2	2	3	3	2	0	0	0	2	2	2	1	0	0	2	2	1	1	0
16	32	13	5	1	5	1	5	2	5	2	1	1	3	3	3	2	2	1	0	0	1	2	1	2	0	0	1	2	1	2	2	0
8	25	11	4	0	3	1	4	2	10	2	1	2	1	3	2	2	1	1	0	0	0	2	0	0	1	0	1	1	2	1	1	1
11	29	7	7	0	6	1	7	1	2	1	0	1	2	1	2	3	3	1	0	0	0	2	1	1	2	0	1	3	2	2	1	0
9	18	3	6	3	0	0	6	0	30	0	0	1	0	1	1	3	3	0	0	0	3	0	0	0	0	0	0	0	3	3	0	0
3	35	14	6	1	1	3	7	3	10	2	3	3	1	3	2	2	3	1	0	0	1	0	0	0	1	0	3	1	3	3	3	0
13	40	12	6	2	8	3	6	3	1	2	1	1	3	2	3	3	2	1	1	0	1	2	2	2	2	1	2	2	2	2	2	1
14	27	8	6	2	5	1	5	0	5	1	0	0	3	1	3	2	2	2	1	0	1	2	1	1	1	0	1	1	2	2	0	0
7	22	9	1	0	4	3	4	1	5	1	1	2	2	1	2	0	1	0	0	0	0	1	0	2	1	1	2	2	1	1	1	0
5	11	3	2	0	0	2	4	0	0	2	0	0	1	0	0	0	2	0	0	0	0	0	0	0	0	1	1	1	2	1	0	0
14	31	12	4	0	5	2	5	3	10	2	1	3	2	2	2	1	2	1	0	0	0	1	1	2	1	1	1	2	2	1	2	1
15	24	13	1	0	2	2	4	2	35	2	2	3	1	2	3	0	1	0	0	0	0	1	0	0	1	0	2	1	1	2	2	0
12	18	7	5	1	0	0	4	1	20	1	0	1	2	2	1	2	2	1	0	0	1	0	0	0	0	0	0	1	2	1	1	0
0	6	3	3	0	0	0	0	0	0	0	0	0	0	3	0	0	3	0	0	0	0	0	0	0	0	0	0	0	0	0	0	0
6	28	10	7	0	6	0	5	0	5	0	0	2	2	3	3	3	3	1	0	0	0	2	2	2	0	0	0	2	1	2	0	0
4	8	4	0	0	0	2	2	0	0	1	0	0	1	1	1	0	0	0	0	0	0	0	0	0	0	1	1	0	1	1	0	0
10	20	9	4	0	3	0	2	2	10	1	1	1	2	2	2	2	1	1	0	0	0	1	1	1	0	0	0	1	1	0	1	1
14	46	16	6	5	7	2	7	3	30	3	2	2	3	3	3	2	3	1	1	1	3	0	2	2	3	1	1	2	2	3	3	0
5	19	9	0	0	1	3	6	0	3	1	2	1	1	2	2	0	0	0	0	0	0	0	0	0	1	1	2	2	2	2	0	0
11	29	13	4	1	6	0	3	2	5	1	2	1	3	3	3	1	2	1	0	0	1	2	1	2	1	0	0	1	1	1	1	1
3	16	5	8	0	1	0	2	0	5	0	1	1	2	1	0	3	3	2	0	0	0	1	0	0	0	0	0	1	0	1	0	0
17	39	13	5	0	8	1	7	5	10	1	2	2	3	2	3	2	2	1	0	0	0	1	2	2	3	1	0	2	2	3	2	3
14	27	8	8	0	6	0	5	0	0	1	0	0	3	2	2	3	3	2	0	0	0	2	1	1	2	0	0	1	2	2	0	0
10	11	4	1	0	2	0	4	0	20	2	0	0	1	1	0	0	0	1	0	0	0	1	0	0	1	0	0	1	2	1	0	0
12	37	17	4	3	4	2	5	2	12	2	3	3	3	3	3	1	2	1	1	1	1	0	0	2	2	0	2	2	2	1	1	1
20	46	15	7	3	8	3	6	4	40	2	2	2	3	3	3	2	2	3	1	1	1	2	2	2	2	1	2	2	2	2	2	2
6	19	11	0	0	2	0	1	5	5	2	0	1	3	3	2	0	0	0	0	0	0	1	0	1	0	0	0	0	1	0	2	3
14	30	8	5	5	4	0	4	4	10	1	0	1	2	2	2	3	2	0	3	1	1	2	0	1	1	0	0	1	2	1	2	2
12	17	7	0	1	4	0	5	0	10	1	1	1	1	1	2	0	0	0	0	0	1	1	0	2	1	0	0	1	2	2	0	0
11	17	7	6	0	2	0	2	0	30	0	0	0	2	2	3	3	2	1	0	0	0	2	0	0	0	0	0	0	1	1	0	0
9	19	2	3	0	3	4	5	2	10	0	0	0	1	1	0	1	1	1	0	0	0	0	1	1	1	2	2	2	2	1	1	1
17	35	12	7	0	9	0	5	2	15	2	1	1	2	3	3	3	3	1	0	0	0	2	2	3	2	0	0	1	2	2	2	0
14	30	9	7	2	5	0	6	1	20	1	1	1	2	2	2	3	3	1	1	0	1	1	1	2	1	0	0	2	2	2	1	0
7	15	4	8	0	0	0	3	0	0	0	0	0	1	2	1	3	3	2	0	0	0	0	0	0	0	0	0	1	1	1	0	0
8	16	4	5	0	0	1	3	3	10	1	0	1	0	1	1	2	2	1	0	0	0	0	0	0	0	1	0	1	1	1	1	2
16	30	13	5	3	1	0	7	1	2	2	1	1	3	3	3	2	3	0	2	0	1	1	0	0	0	0	0	2	2	3	1	0
7	19	10	2	0	0	2	5	0	10	2	1	0	2	2	3	1	1	0	0	0	0	0	0	0	0	1	1	2	2	1	0	0
10	24	7	6	1	3	0	5	2	3	1	0	1	2	2	1	2	3	1	0	0	1	1	0	1	1	0	0	1	2	2	2	0
0	8	2	3	0	1	1	1	0	0	0	0	1	1	0	0	1	1	1	0	0	0	1	0	0	0	0	1	1	0	0	0	0
12	26	14	2	0	4	2	4	0	10	2	1	3	3	2	3	1	1	0	0	0	0	2	0	1	1	1	1	1	2	1	0	0
4	22	7	8	0	0	0	7	0	4.99	0	0	0	3	3	1	3	3	2	0	0	0	0	0	0	0	0	0	3	2	2	0	0
13	33	11	6	1	8	1	5	1	50	2	1	1	2	2	3	3	2	1	0	0	1	2	2	3	1	0	1	2	2	1	1	0
2	8	7	0	0	0	0	0	1	0	2	0	1	1	2	1	0	0	0	0	0	0	0	0	0	0	0	0	0	0	0	0	1
14	21	6	5	1	2	1	4	2	10	1	0	1	1	1	2	2	2	1	1	0	0	1	0	1	0	0	1	2	1	1	2	0
0	5	1	2	0	0	1	0	1	2	1	0	0	0	0	0	1	1	0	0	0	0	0	0	0	0	0	1	0	0	0	0	1
5	26	9	7	0	3	1	4	2	12	2	0	1	2	2	2	3	2	2	0	0	0	1	0	1	1	0	1	2	1	1	2	0
9	0	0	0	0	0	0	0	0	0	0	0	0	0	0	0	0	0	0	0	0	0	0	0	0	0	0	0	0	0	0	0	0
13	33	11	7	4	5	0	5	1	8	3	1	2	1	2	2	2	3	2	1	1	2	1	1	2	1	0	0	1	2	2	1	0
10	21	6	5	0	4	0	4	2	5	1	0	0	2	2	1	3	1	1	0	0	0	1	0	2	1	0	0	2	1	1	2	0
15	31	13	4	1	3	0	4	6	10	2	2	2	2	3	2	2	1	1	0	0	1	1	0	1	1	0	0	0	3	1	3	3
12	28	6	7	2	6	0	5	2	1	0	0	0	2	2	2	3	3	1	0	0	2	1	2	2	1	0	0	2	2	1	2	0
7	12	6	0	0	2	3	1	0	2	2	0	0	1	1	2	0	0	0	0	0	0	1	0	0	1	1	2	0	1	0	0	0
10	28	12	0	1	1	4	7	3	15	3	1	2	3	1	2	0	0	0	1	0	0	0	0	0	1	2	2	2	3	2	2	1
4	10	3	4	0	0	0	3	0	2	0	0	0	1	1	1	1	2	1	0	0	0	0	0	0	0	0	0	1	1	1	0	0
13	16	4	5	0	5	0	2	0	30	1	0	0	1	1	1	2	2	1	0	0	0	1	1	2	1	0	0	1	1	0	0	0
13	32	6	7	1	4	3	7	4	5	0	0	0	2	2	2	3	3	1	1	0	0	1	0	1	2	1	2	3	2	2	2	2
7	16	5	5	0	2	0	3	1	20	1	0	1	1	1	1	3	1	1	0	0	0	2	0	0	0	0	0	1	1	1	1	0
10	26	5	6	0	3	2	6	4	5	1	0	0	1	2	1	2	3	1	0	0	0	0	0	1	2	1	1	2	2	2	2	2
10	26	12	3	0	3	2	6	0	20	2	1	2	3	2	2	1	2	0	0	0	0	1	0	1	1	1	1	2	2	2	0	0
10	35	14	6	1	3	0	6	5	20	2	1	2	3	3	3	2	3	1	0	0	1	2	0	1	0	0	0	2	2	2	3	2
12	24	8	4	0	0	3	6	3	10	2	0	2	2	1	1	2	2	0	0	0	0	0	0	0	0	1	2	2	2	2	2	1
19	31	11	8	0	5	1	6	0	5	1	1	2	2	2	3	3	3	2	0	0	0	0	1	2	2	1	0	1	2	3	0	0
16	25	12	2	0	2	1	4	4	15	3	1	1	2	2	3	0	0	2	0	0	0	1	0	1	0	0	1	1	1	2	2	2
2	14	11	2	0	1	0	0	0	0	2	2	2	1	2	2	1	1	0	0	0	0	1	0	0	0	0	0	0	0	0	0	0
10	20	7	4	0	5	1	3	0	50	0	1	1	2	2	1	0	2	2	0	0	0	3	0	1	1	0	1	1	1	1	0	0
13	27	10	3	0	6	0	6	2	5	1	1	1	2	2	3	0	3	0	0	0	0	1	1	2	2	0	0	2	2	2	2	0
8	5	1	0	0	1	0	3	0	7	0	0	1	0	0	0	0	0	0	0	0	0	0	0	0	1	0	0	2	0	1	0	0
12	28	11	5	0	4	3	3	2	30	2	2	1	2	2	2	2	2	1	0	0	0	1	1	1	1	2	1	0	2	1	1	1
7	14	7	3	0	0	0	4	0	3	1	0	0	2	1	3	1	1	1	0	0	0	0	0	0	0	0	0	1	2	1	0	0
12	19	9	0	0	2	2	5	1	5	2	0	1	2	2	2	0	0	0	0	0	0	0	0	2	0	1	1	2	2	1	1	0
19	39	13	2	6	7	1	9	1	0	1	1	3	3	2	3	0	0	2	2	1	3	2	1	3	1	0	1	3	3	3	1	0
6	12	7	1	0	2	0	0	2	5	0	1	0	2	2	2	0	1	0	0	0	0	1	0	1	0	0	0	0	0	0	2	0
17	26	10	2	0	8	0	4	2	5	2	2	1	1	3	1	0	1	1	0	0	0	2	1	2	3	0	0	1	1	2	1	1
13	35	11	5	3	6	3	4	3	10	2	1	3	1	2	2	1	2	2	2	0	1	3	1	1	1	2	1	1	2	1	1	2
4	27	12	4	0	2	4	5	0	0	2	1	2	3	2	2	1	2	1	0	0	0	1	0	0	1	2	2	1	2	2	0	0
18	31	12	4	0	8	0	5	2	20	2	1	1	2	3	3	2	2	0	0	0	0	2	2	3	1	0	0	1	1	3	2	0
13	33	14	5	0	8	1	4	1	25	1	2	2	3	3	3	1	3	1	0	0	0	2	2	3	1	0	1	1	1	2	1	0
10	3	2	1	0	0	0	0	0	0	0	0	0	1	0	1	1	0	0	0	0	0	0	0	0	0	0	0	0	0	0	0	0
11	32	10	4	3	4	3	5	3	5	2	1	1	2	2	2	1	2	1	1	1	1	0	1	2	1	1	2	2	1	2	1	2
8	15	9	1	0	4	0	1	0	5	2	1	0	2	2	2	1	0	0	0	0	0	2	1	1	0	0	0	0	0	1	0	0
14	28	9	3	3	7	2	4	0	50	2	1	0	2	2	2	1	1	1	2	0	1	2	1	2	2	1	1	2	1	1	0	0
5	11	3	2	0	2	1	3	0	0	1	1	0	0	1	0	1	1	0	0	0	0	1	0	1	0	0	1	1	1	1	0	0
15	41	11	8	1	6	4	8	3	20	1	0	1	3	3	3	3	3	2	0	0	1	1	0	3	2	2	2	3	3	2	2	1
16	23	6	2	2	5	2	6	0	10	1	0	0	1	2	2	1	1	0	0	0	2	1	1	2	1	1	1	2	2	2	0	0
13	25	7	1	3	4	2	6	2	10	1	1	1	1	2	1	0	1	0	1	1	1	0	1	1	2	1	1	2	2	2	1	1
6	20	10	5	0	3	0	2	0	5	2	1	1	2	2	2	2	2	1	0	0	0	1	0	1	1	0	0	0	1	1	0	0
14	33	9	6	1	7	3	6	1	10	1	1	1	2	2	2	2	2	2	0	0	1	1	2	2	2	2	1	2	2	2	1	0
2	25	13	0	1	3	0	2	6	50	3	1	1	2	3	3	0	0	0	0	0	1	2	0	1	0	0	0	0	2	0	3	3
12	14	5	6	0	0	2	1	0	5	0	0	0	1	1	3	3	3	0	0	0	0	0	0	0	0	1	1	0	1	0	0	0
2	16	3	4	1	3	0	3	2	5	1	0	1	1	0	0	1	1	2	0	0	1	1	1	1	0	0	0	2	0	1	1	1
10	20	7	6	0	0	1	6	0	4.99	1	0	0	2	2	2	2	2	2	0	0	0	0	0	0	0	1	0	2	2	2	0	0
8	15	3	7	0	0	1	4	0	10	0	0	2	0	0	1	3	3	1	0	0	0	0	0	0	0	0	1	1	1	2	0	0
12	16	8	0	0	2	1	1	4	20	1	0	1	2	2	2	0	0	0	0	0	0	1	0	0	1	0	1	0	0	1	2	2
15	26	9	1	1	8	1	6	0	10	3	0	0	2	2	2	0	0	1	0	0	1	2	2	2	2	1	0	3	1	2	0	0
13	30	14	2	2	2	4	3	3	25	3	2	3	2	2	2	1	1	0	1	0	1	0	0	1	1	2	2	2	1	0	1	2
4	21	8	4	0	0	2	7	0	3	3	0	0	1	3	1	2	2	0	0	0	0	0	0	0	0	0	2	2	2	3	0	0
8	18	11	2	0	2	2	1	0	5	2	1	2	3	1	2	0	2	0	0	0	0	1	0	0	1	1	1	1	0	0	0	0
13	31	8	8	2	5	2	6	0	10	2	0	2	1	1	2	3	3	2	1	0	1	1	1	2	1	1	1	2	2	2	0	0
7	19	5	6	0	2	0	5	1	15	1	0	1	1	1	1	2	2	2	0	0	0	1	0	0	1	0	0	0	3	2	1	0
3	9	4	0	0	0	3	2	0	10	1	0	0	1	1	1	0	0	0	0	0	0	0	0	0	0	1	2	1	0	1	0	0
8	23	8	0	1	3	2	5	4	0	1	1	1	1	2	2	0	0	0	0	0	1	2	0	0	1	1	1	1	2	2	2	2
6	11	4	3	0	1	0	3	0	10	1	0	0	1	1	1	1	1	1	0	0	0	1	0	0	0	0	0	1	1	1	0	0
6	28	13	6	1	3	0	4	1	20	2	1	1	3	3	3	2	3	1	0	0	1	1	0	1	1	0	0	1	1	2	1	0
14	23	12	1	0	3	2	5	0	30	3	1	1	2	2	3	0	1	0	0	0	0	1	0	1	1	1	1	2	2	1	0	0
19	39	14	7	0	8	3	6	1	10	1	2	2	3	3	3	3	3	1	0	0	0	2	1	2	3	1	2	2	2	2	1	0
8	11	6	0	1	2	2	0	0	10	1	0	1	2	1	1	0	0	0	0	0	1	1	0	1	0	0	2	0	0	0	0	0
10	20	4	7	0	0	3	3	3	5	1	0	1	0	1	1	3	2	2	0	0	0	0	0	0	0	2	1	1	1	1	1	2
13	55	16	7	6	9	5	7	5	20	2	3	2	3	3	3	3	3	1	2	2	2	2	2	2	3	3	2	2	3	2	3	2
11	17	7	4	0	3	0	3	0	1.99	1	0	0	2	2	2	2	1	1	0	0	0	2	1	0	0	0	0	1	1	1	0	0
11	29	11	6	0	1	2	4	5	20	0	1	3	2	3	2	2	3	1	0	0	0	0	0	1	0	1	1	1	2	1	2	3
1	16	8	0	0	2	2	2	2	0	3	0	0	3	0	2	0	0	0	0	0	0	2	0	0	0	1	1	1	1	0	1	1
13	37	13	5	5	5	1	6	2	20	3	2	2	2	2	2	2	2	1	2	1	2	2	0	1	2	1	0	2	2	2	2	0
9	26	10	5	0	5	2	4	0	5	1	0	1	3	2	3	1	3	1	0	0	0	3	0	1	1	1	1	1	2	1	0	0
19	39	13	8	2	9	0	6	1	30	2	2	1	2	3	3	3	3	2	0	0	2	2	2	3	2	0	0	2	2	2	1	0
18	46	15	7	6	8	3	4	3	1	3	2	2	3	2	3	2	2	3	2	2	2	2	1	3	2	2	1	1	1	2	2	1
2	12	6	0	1	0	2	3	0	10	3	0	0	1	1	1	0	0	0	0	0	1	0	0	0	0	1	1	2	0	1	0	0
12	20	8	2	0	3	3	4	0	10	0	1	1	2	2	2	0	1	1	0	0	0	1	0	1	1	1	2	1	1	2	0	0
7	17	12	1	0	0	0	4	0	5	3	3	2	1	2	1	0	1	0	0	0	0	0	0	0	0	0	0	1	2	1	0	0
10	23	11	2	1	3	1	4	1	4	2	2	1	1	3	2	1	1	0	0	0	1	1	0	1	1	0	1	1	1	2	1	0
3	18	4	4	1	2	2	3	2	5	0	0	1	1	1	1	2	2	0	1	0	0	2	0	0	0	0	2	1	1	1	1	1
13	25	9	6	0	2	1	6	1	10	1	0	0	2	3	3	2	3	1	0	0	0	1	0	1	0	0	1	2	2	2	1	0
9	28	14	3	2	1	1	6	1	7	3	1	2	3	2	3	1	2	0	0	1	1	0	0	1	0	0	1	1	3	2	1	0
9	24	13	3	0	2	0	5	1	5	3	1	1	3	3	2	0	3	0	0	0	0	1	0	1	0	0	0	2	1	2	1	0
15	35	11	7	1	9	0	6	1	50	1	1	2	2	2	3	2	3	2	0	0	1	2	2	3	2	0	0	2	2	2	1	0
14	25	11	4	0	6	0	4	0	20	2	1	1	2	2	3	1	2	1	0	0	0	2	1	2	1	0	0	1	1	2	0	0
10	23	13	1	1	4	2	2	0	30	2	1	1	3	3	3	0	1	0	1	0	0	1	0	1	2	1	1	0	1	1	0	0
10	16	3	6	0	3	0	2	2	5	1	0	0	1	0	1	2	2	2	0	0	0	1	1	1	0	0	0	0	1	1	2	0
2	14	10	1	0	1	0	2	0	4	3	1	0	3	1	2	0	1	0	0	0	0	0	0	0	1	0	0	0	1	1	0	0
10	32	16	6	0	2	3	4	1	50	3	2	2	3	3	3	2	3	1	0	0	0	0	0	1	1	2	1	1	2	1	1	0
9	18	7	7	0	2	0	2	0	2	0	0	1	2	2	2	3	2	2	0	0	0	1	0	0	1	0	0	1	1	0	0	0
12	22	9	6	0	3	0	3	1	5	0	1	2	2	2	2	2	2	2	0	0	0	1	0	2	0	0	0	1	1	1	1	0
14	34	11	4	4	6	1	5	3	45	1	1	2	1	3	3	1	2	1	2	1	1	1	1	2	2	1	0	1	2	2	2	1
14	25	8	8	1	5	0	3	0	3	1	0	1	2	2	2	3	3	2	0	0	1	2	0	1	2	0	0	1	1	1	0	0
19	40	15	7	2	5	1	7	3	150	3	3	2	1	3	3	2	3	2	0	0	2	0	2	3	0	0	1	2	2	3	3	0
5	18	8	0	0	4	3	2	1	50	3	0	1	2	1	1	0	0	0	0	0	0	1	0	1	2	0	3	1	1	0	0	1
12	14	2	6	0	2	1	3	0	8	0	0	1	0	1	0	2	2	2	0	0	0	1	0	0	1	1	0	1	2	0	0	0
11	10	6	0	1	1	0	2	0	5	2	0	0	1	2	1	0	0	0	0	0	1	1	0	0	0	0	0	1	0	1	0	0
14	23	7	7	1	3	0	5	0	1	1	0	1	1	2	2	2	3	2	0	0	1	0	1	1	1	0	0	3	1	1	0	0
17	27	12	2	0	6	1	6	0	10	3	2	1	2	2	2	2	0	0	0	0	0	2	1	2	1	0	1	2	2	2	0	0
9	16	3	6	0	3	0	3	1	2	0	0	0	1	1	1	2	2	2	0	0	0	1	0	1	1	0	0	1	1	1	1	0
14	37	12	7	5	8	0	3	2	50	2	1	1	3	2	3	2	3	2	2	1	2	2	2	3	1	0	0	0	2	1	2	0
4	11	3	4	0	3	0	1	0	5	0	0	1	1	0	1	2	1	1	0	0	0	2	0	0	1	0	0	0	1	0	0	0
15	25	11	3	5	1	0	4	1	10	1	1	2	2	2	3	1	2	0	1	2	2	0	0	1	0	0	0	1	1	2	1	0
8	13	4	4	0	0	1	3	1	30	2	0	1	0	1	0	2	2	0	0	0	0	0	0	0	0	0	1	1	1	1	1	0
13	25	12	4	4	2	0	3	0	3	2	3	3	1	1	2	2	2	0	1	1	2	0	0	1	1	0	0	1	1	1	0	0
12	30	11	6	0	6	1	6	0	20	1	1	0	3	3	3	2	3	1	0	0	0	2	1	1	2	0	1	2	2	2	0	0
14	27	11	3	1	2	0	5	5	500	1	1	2	2	3	2	1	2	0	1	0	0	1	0	1	0	0	0	1	2	2	2	3
14	35	14	5	0	5	3	6	2	50	2	1	3	2	3	3	1	3	1	0	0	0	2	1	1	1	1	2	2	2	2	1	1
0	31	17	8	0	2	0	4	0	3	2	3	3	3	3	3	3	3	2	0	0	0	1	0	0	1	0	0	1	2	1	0	0
9	15	3	6	0	6	0	0	0	3	1	1	0	1	0	0	2	3	1	0	0	0	2	2	2	0	0	0	0	0	0	0	0
3	12	3	5	0	0	2	2	0	2	0	0	1	1	0	1	2	2	1	0	0	0	0	0	0	0	1	1	1	1	0	0	0
10	25	9	1	1	7	1	2	4	1	1	0	3	1	3	1	0	1	0	1	0	0	2	1	1	3	0	1	0	0	2	2	2
11	23	10	0	2	3	2	4	2	10	2	0	0	3	3	2	0	0	0	1	0	1	2	0	0	1	1	1	2	0	2	2	0
9	14	3	3	0	4	0	3	1	10	0	1	1	0	1	0	1	1	1	0	0	0	1	1	1	1	0	0	1	1	1	1	0
10	27	11	4	3	2	0	5	2	15	2	1	2	3	2	1	1	2	1	2	0	1	1	1	0	0	0	0	2	1	2	1	1
14	20	6	4	0	4	0	4	2	5	2	0	0	2	1	1	2	1	1	0	0	0	2	1	1	0	0	0	2	1	1	1	1
12	25	10	4	0	4	0	5	2	20	1	1	1	2	2	3	1	2	1	0	0	0	1	1	1	1	0	0	2	1	2	2	0
4	7	2	1	0	1	2	0	1	1	0	0	0	0	1	1	0	1	0	0	0	0	0	0	1	0	1	1	0	0	0	1	0
8	22	6	8	0	4	0	4	0	20	0	1	0	2	2	1	3	2	3	0	0	0	1	2	0	1	0	0	2	1	1	0	0
11	24	11	4	1	2	2	4	0	10	2	1	2	2	2	2	2	2	0	0	0	1	1	0	1	0	1	1	1	2	1	0	0
14	40	12	8	0	7	0	8	5	12	1	1	2	2	3	3	3	3	2	0	0	0	2	2	2	1	0	0	3	3	2	3	2
16	31	13	3	1	4	3	6	1	0	3	1	1	2	3	3	1	2	0	1	0	0	1	0	1	2	1	2	2	2	2	1	0
8	27	10	5	0	4	1	6	1	5	1	1	1	2	3	2	2	2	1	0	0	0	2	1	1	0	1	0	2	2	2	1	0
9	18	10	0	0	6	0	0	2	40	1	0	0	3	3	3	0	0	0	0	0	0	2	1	2	1	0	0	0	0	0	0	2
11	19	10	0	1	4	2	2	0	0	2	0	1	1	3	3	0	0	0	1	0	0	1	1	2	0	1	1	0	1	1	0	0
16	38	12	6	5	2	1	8	4	30	3	1	3	1	3	1	2	2	2	1	2	2	0	0	1	1	1	0	2	3	3	2	2
18	38	14	5	3	5	2	7	2	5	2	2	1	3	3	3	2	2	1	0	1	2	0	2	2	1	0	2	2	2	3	2	0
12	27	11	1	1	2	4	5	3	20	2	1	2	2	2	2	0	1	0	1	0	0	1	0	0	1	2	2	2	2	1	1	2
13	42	16	8	1	8	1	6	2	0	3	3	1	3	3	3	3	3	2	0	0	1	2	3	3	0	0	1	2	2	2	2	0
16	28	15	0	0	4	1	6	2	7	3	1	2	3	3	3	0	0	0	0	0	0	1	0	1	2	1	0	2	2	2	1	1
0	10	1	7	0	0	0	2	0	5	0	0	0	1	0	0	3	1	3	0	0	0	0	0	0	0	0	0	1	0	1	0	0
11	23	14	7	0	0	2	0	0	2	1	2	2	3	3	3	2	2	3	0	0	0	0	0	0	0	1	1	0	0	0	0	0
14	43	12	9	4	8	1	9	0	5	1	1	3	2	3	2	3	3	3	2	0	2	2	1	2	3	1	0	3	3	3	0	0
10	38	17	0	0	6	2	7	6	20	3	3	2	3	3	3	0	0	0	0	0	0	2	1	2	1	1	1	3	2	2	3	3
10	25	12	2	1	1	2	5	2	10	1	2	2	3	3	1	0	2	0	0	0	1	1	0	0	0	1	1	3	0	2	2	0
12	22	6	5	0	4	0	6	1	75	1	0	0	2	2	1	2	2	1	0	0	0	1	1	1	1	0	0	2	2	2	1	0
18	47	13	7	3	9	2	8	5	200	2	2	2	2	3	2	2	3	2	1	1	1	2	2	2	3	1	1	2	3	3	3	2
14	28	11	4	2	4	2	3	2	160	1	1	1	2	3	3	1	3	0	1	0	1	1	1	1	1	1	1	1	1	1	1	1
12	26	6	7	0	3	2	6	2	10	1	0	1	2	1	1	3	2	2	0	0	0	1	0	2	0	1	1	2	2	2	1	1
13	31	10	3	3	5	1	5	4	7	2	2	1	2	1	2	1	1	1	2	0	1	2	1	2	0	0	1	1	2	2	2	2
13	26	8	5	4	4	0	4	1	2	1	1	0	2	2	2	2	2	1	0	2	2	0	0	1	3	0	0	2	1	1	1	0
13	27	9	5	1	3	2	5	2	5	2	1	1	2	1	2	2	2	1	0	0	1	1	0	1	1	1	1	2	1	2	1	1
9	21	10	1	1	3	1	5	0	20	2	2	0	2	2	2	0	1	0	1	0	0	2	0	1	0	0	1	2	1	2	0	0
16	49	12	6	6	9	5	5	6	50	2	1	2	3	2	2	3	2	1	2	1	3	1	3	3	2	2	3	1	2	2	3	3
16	27	11	5	0	2	3	4	2	5	1	2	1	2	3	2	1	2	2	0	0	0	1	0	1	0	2	1	1	2	1	2	0
14	31	10	7	0	2	1	6	5	30	2	1	0	1	3	3	3	3	1	0	0	0	0	0	1	1	1	0	1	2	3	2	3
7	12	4	0	1	2	3	0	2	20	1	0	1	0	1	1	0	0	0	1	0	0	1	0	0	1	1	2	0	0	0	1	1
14	39	12	4	3	7	2	9	2	10	1	0	2	3	3	3	1	2	1	3	0	0	3	2	2	0	1	1	3	3	3	2	0
5	19	9	5	0	1	1	3	0	5	2	1	1	2	2	1	2	2	1	0	0	0	0	0	1	0	1	0	1	1	1	0	0
4	28	8	7	0	0	2	9	2	30	1	0	0	3	1	3	3	3	1	0	0	0	0	0	0	0	2	0	3	3	3	2	0
16	21	6	4	2	2	2	4	1	9.99	1	1	1	1	1	1	1	2	1	1	0	1	0	1	1	0	1	1	1	1	2	0	1
11	33	12	9	0	4	2	2	4	200	2	1	1	2	3	3	3	3	3	0	0	0	0	1	3	0	1	1	1	1	0	2	2
11	16	3	5	0	2	0	4	2	2	0	1	0	1	1	0	3	1	1	0	0	0	1	0	0	1	0	0	1	1	2	2	0
9	18	7	2	1	0	3	4	1	1	2	1	3	1	0	0	0	2	0	0	0	1	0	0	0	0	1	2	2	0	2	1	0
9	22	9	4	1	2	0	3	3	15	2	1	1	2	2	1	2	1	1	0	0	1	0	1	1	0	0	0	1	1	1	2	1
11	22	10	5	0	0	2	4	1	50	1	1	1	2	2	3	1	3	1	0	0	0	0	0	0	0	1	1	1	2	1	0	1
7	3	0	3	0	0	0	0	0	10	0	0	0	0	0	0	1	1	1	0	0	0	0	0	0	0	0	0	0	0	0	0	0
14	25	3	5	0	8	3	3	3	6	1	0	2	0	0	0	2	3	0	0	0	0	2	2	2	2	0	3	3	0	0	3	0
11	25	16	6	0	0	1	2	0	1	2	3	3	2	3	3	2	3	1	0	0	0	0	0	0	0	1	0	1	1	0	0	0
10	22	12	0	2	5	1	1	1	20	3	0	1	3	2	3	0	0	0	1	0	1	2	1	2	0	0	1	1	0	0	0	1
11	30	15	1	3	7	1	3	0	5	3	1	2	3	3	3	0	1	0	1	1	1	2	1	2	2	0	1	1	0	2	0	0
13	32	15	5	0	1	2	6	3	20	2	2	2	3	3	3	1	3	1	0	0	0	1	0	0	0	1	1	2	2	2	2	1
9	27	7	7	0	3	3	6	1	10	0	0	0	2	2	3	3	3	1	0	0	0	1	0	2	0	1	2	3	2	1	1	0
16	19	10	2	0	2	0	5	0	10	2	1	2	1	1	3	1	1	0	0	0	0	0	0	1	1	0	0	2	2	1	0	0
11	16	3	6	0	4	0	3	0	5	0	0	0	1	1	1	3	1	2	0	0	0	2	1	1	0	0	0	1	1	1	0	0
14	33	13	6	0	3	1	6	4	10	2	2	3	0	3	3	2	2	2	0	0	0	1	0	2	0	1	0	2	2	2	2	2
15	34	12	4	5	8	0	3	2	20	2	1	2	2	3	2	0	2	2	1	2	2	2	2	2	2	0	0	1	0	2	2	0
7	19	8	4	0	1	1	3	2	1	2	1	1	2	2	0	1	2	1	0	0	0	1	0	0	0	1	0	1	1	1	1	1
12	18	9	2	0	0	1	6	0	5	3	0	2	1	2	1	0	2	0	0	0	0	0	0	0	0	0	1	2	1	3	0	0
5	24	16	1	1	1	0	5	0	10	3	3	2	3	2	3	0	1	0	0	0	1	0	0	0	1	0	0	1	2	2	0	0
10	27	15	0	2	3	1	6	0	3	3	2	3	3	2	2	0	0	0	1	0	1	1	0	1	1	1	0	2	2	2	0	0
9	16	4	3	1	3	0	2	3	5	0	1	0	1	1	1	0	2	1	1	0	0	2	0	1	0	0	0	0	1	1	0	3
10	19	8	5	0	4	0	2	0	6	1	1	1	1	2	2	2	2	1	0	0	0	1	1	1	1	0	0	0	1	1	0	0
12	27	13	4	0	2	0	5	3	10	2	2	2	2	3	2	1	2	1	0	0	0	1	0	1	0	0	0	2	2	1	2	1
14	28	9	6	0	8	0	4	1	10	0	0	1	3	3	2	2	2	2	0	0	0	2	1	2	3	0	0	2	2	0	1	0
14	38	17	5	2	3	2	5	4	35	3	3	3	2	3	3	1	2	2	2	0	0	1	0	1	1	1	1	1	2	2	2	2
6	20	8	0	1	3	1	4	3	50	2	0	0	2	2	2	0	0	0	1	0	0	2	0	1	0	0	1	1	1	2	1	2
11	18	8	0	2	3	0	5	0	5	2	0	2	3	1	0	0	0	0	1	0	1	3	0	0	0	0	0	1	2	2	0	0
17	21	11	2	2	3	0	3	0	70	2	0	1	3	3	2	1	1	0	1	0	1	0	0	2	1	0	0	0	1	2	0	0
2	13	6	0	0	1	3	3	0	10	2	0	0	2	1	1	0	0	0	0	0	0	1	0	0	0	1	2	2	0	1	0	0
13	33	14	5	0	6	1	4	3	5	2	3	1	3	2	3	3	2	0	0	0	0	2	1	2	1	0	1	0	2	2	1	2
9	12	2	7	0	1	2	0	0	5	0	0	0	1	1	0	3	1	3	0	0	0	1	0	0	0	1	1	0	0	0	0	0
7	23	7	8	0	4	1	3	0	5	1	0	0	2	2	2	3	3	2	0	0	0	2	0	0	2	0	1	1	1	1	0	0
5	14	4	4	0	3	0	3	0	5	0	1	0	2	0	1	2	1	1	0	0	0	1	1	1	0	0	0	1	0	2	0	0
11	29	13	7	1	4	1	1	2	50	2	3	1	3	2	2	3	2	2	1	0	0	2	0	1	1	0	1	0	0	1	2	0
12	27	12	3	0	1	3	6	2	5	2	1	1	2	3	3	1	2	0	0	0	0	1	0	0	0	1	2	2	2	2	1	1
7	34	18	6	0	1	3	5	1	10	3	3	3	3	3	3	3	2	1	0	0	0	1	0	0	0	1	2	2	2	1	1	0
15	37	10	3	4	4	2	8	6	10	1	1	2	2	1	3	0	2	1	1	1	2	2	0	1	1	1	1	3	3	2	3	3
16	32	13	2	2	7	1	7	0	0	2	2	1	2	3	3	1	1	0	1	0	1	2	2	3	0	0	1	3	2	2	0	0
14	31	11	8	1	3	2	5	1	6	1	2	1	2	3	2	3	3	2	0	0	1	0	0	2	1	1	1	1	2	2	1	0
9	29	12	5	1	4	0	7	0	8	0	3	3	1	3	2	2	3	0	0	0	1	1	1	1	1	0	0	3	2	2	0	0
11	24	12	4	0	4	0	4	0	3	2	2	0	2	3	3	3	1	0	0	0	0	2	0	1	1	0	0	1	1	2	0	0
14	27	11	5	1	3	2	3	2	50	2	2	2	2	2	1	2	2	1	1	0	0	1	0	1	1	1	1	1	1	1	1	1
7	15	5	5	0	1	0	4	0	30	2	0	0	2	1	0	2	2	1	0	0	0	1	0	0	0	0	0	2	1	1	0	0
16	43	14	6	2	6	3	9	3	29.99	2	2	2	2	3	3	3	2	1	1	0	1	0	2	2	2	1	2	3	3	3	2	1
12	28	8	5	1	6	2	5	1	25	1	1	1	2	2	1	2	2	1	0	0	1	2	2	1	1	1	1	2	1	2	1	0
19	47	13	7	7	6	2	7	5	10	2	2	3	1	3	2	2	3	2	2	3	2	1	1	2	2	1	1	2	2	3	2	3
13	30	10	6	1	3	3	6	1	10	1	1	1	2	2	3	3	3	0	0	0	1	1	0	1	1	1	2	2	3	1	1	0
10	20	9	5	0	2	0	4	0	10	2	0	0	2	2	3	2	2	1	0	0	0	0	0	1	1	0	0	1	2	1	0	0
12	17	5	3	0	5	0	3	1	5	0	0	0	1	2	2	1	1	1	0	0	0	1	0	2	2	0	0	0	2	1	1	0
12	37	13	4	5	3	2	6	4	1500	2	3	3	1	2	2	1	2	1	3	1	1	1	1	0	1	1	1	1	3	2	2	2
13	32	11	2	4	6	3	3	3	150	2	1	2	3	1	2	1	1	0	1	1	2	3	1	0	2	1	2	1	1	1	1	2
12	29	11	4	0	8	0	5	1	40	2	2	1	1	3	2	2	2	0	0	0	0	2	2	2	2	0	0	2	2	1	1	0
17	53	14	7	7	8	5	7	5	50	2	2	2	3	2	3	3	2	2	2	3	2	1	2	2	3	3	2	3	2	2	3	2
16	39	14	6	0	8	2	7	2	5	2	2	3	2	2	3	2	3	1	0	0	0	1	2	2	3	1	1	2	2	3	1	1
0	6	0	2	0	0	1	3	0	0	0	0	0	0	0	0	0	1	1	0	0	0	0	0	0	0	1	0	1	1	1	0	0
12	31	12	8	0	6	0	4	1	30	1	1	1	3	3	3	3	3	2	0	0	0	2	1	1	2	0	0	1	2	1	1	0
12	25	13	2	0	4	3	3	0	50	2	2	3	3	2	1	1	1	0	0	0	0	1	0	2	1	1	2	1	2	0	0	0
12	25	7	9	3	0	0	2	4	15	0	0	2	1	3	1	3	3	3	1	1	1	0	0	0	0	0	0	0	1	1	3	1
17	44	14	7	5	5	4	7	2	15	1	2	3	2	3	3	2	3	2	1	1	3	1	1	2	1	2	2	2	3	2	2	0
12	29	11	5	0	5	1	4	3	5	1	1	0	3	3	3	2	2	1	0	0	0	1	1	1	2	1	0	1	2	1	2	1
13	32	10	8	0	7	2	5	0	30	0	1	1	2	3	3	3	3	2	0	0	0	2	2	2	1	0	2	2	2	1	0	0
8	14	4	4	0	2	0	3	1	10	1	0	0	1	1	1	1	2	1	0	0	0	0	0	1	1	0	0	1	1	1	1	0
12	21	8	4	1	3	0	2	3	3	1	1	1	1	2	2	2	2	0	0	0	1	1	0	1	1	0	0	0	1	1	1	2
15	30	10	7	1	6	0	4	2	20	2	1	0	3	2	2	2	3	2	0	0	1	2	0	2	2	0	0	0	2	2	2	0
10	31	10	6	0	0	5	8	2	30	1	1	2	1	3	2	3	3	0	0	0	0	0	0	0	0	3	2	3	3	2	2	0
6	20	7	4	1	3	1	4	0	10	1	1	1	2	1	1	2	2	0	0	0	1	1	1	1	0	0	1	2	1	1	0	0
2	19	10	6	0	0	1	1	1	5	1	1	2	3	1	2	3	3	0	0	0	0	0	0	0	0	1	0	0	1	0	0	1
7	24	10	5	0	2	2	3	2	1.79	1	1	1	3	2	2	2	2	1	0	0	0	0	0	1	1	1	1	1	1	1	1	1
5	24	11	6	0	3	1	3	0	20	1	1	2	2	2	3	2	3	1	0	0	0	1	0	1	1	1	0	0	2	1	0	0
4	15	4	6	0	1	0	3	1	40	0	0	0	3	0	1	2	3	1	0	0	0	1	0	0	0	0	0	2	0	1	1	0
9	23	10	3	0	3	1	5	1	8	2	1	2	2	1	2	1	2	0	0	0	0	1	1	1	0	0	1	2	1	2	1	0
9	21	11	3	0	2	1	4	0	10	3	0	1	2	2	3	1	1	1	0	0	0	1	0	1	0	0	1	2	1	1	0	0
12	11	3	4	0	2	0	1	1	5	0	0	0	1	1	1	1	3	0	0	0	0	0	0	1	1	0	0	1	0	0	1	0
10	30	13	2	2	3	2	8	0	15	3	1	1	3	2	3	0	2	0	0	0	2	1	0	0	2	1	1	3	2	3	0	0
8	24	12	2	0	0	5	4	1	5	3	1	2	2	1	3	0	2	0	0	0	0	0	0	0	0	3	2	1	3	0	1	0
7	18	3	9	0	4	0	2	0	2	0	0	2	1	0	0	3	3	3	0	0	0	2	0	0	2	0	0	1	0	1	0	0
14	28	12	3	0	6	2	2	3	15	2	1	1	3	3	2	1	2	0	0	0	0	2	1	1	2	1	1	0	1	1	2	1
13	30	13	1	3	4	4	4	1	30	2	2	2	1	3	3	1	0	0	1	1	1	1	0	1	2	2	2	1	1	2	1	0
10	27	12	1	5	4	0	4	1	25	2	2	1	1	3	3	0	1	0	2	1	2	2	0	2	0	0	0	2	0	2	0	1
11	31	9	5	1	6	4	5	1	5	1	1	1	2	2	2	2	2	1	0	0	1	3	0	1	2	2	2	2	2	1	0	1
13	22	7	5	2	2	0	5	1	10	0	1	2	0	2	2	2	2	1	0	1	1	1	0	1	0	0	0	1	2	2	1	0
10	29	12	3	0	4	2	6	2	5	2	1	1	2	3	3	1	1	1	0	0	0	1	0	1	2	1	1	2	2	2	1	1
10	25	12	4	0	3	1	5	0	5	2	1	0	3	3	3	1	2	1	0	0	0	1	0	2	0	0	1	1	2	2	0	0
10	15	7	0	1	2	4	1	0	2	3	1	1	1	0	1	0	0	0	0	0	1	1	0	1	0	1	3	0	1	0	0	0
14	24	9	0	1	7	1	6	0	3	2	0	0	2	2	3	0	0	0	0	0	1	1	0	3	3	1	0	2	2	2	0	0
6	20	8	4	0	0	3	4	1	15	1	1	2	2	1	1	2	2	0	0	0	0	0	0	0	0	1	2	2	1	1	0	1
10	31	16	0	3	5	1	6	0	15	3	2	2	3	3	3	0	0	0	2	0	1	2	1	1	1	0	1	2	2	2	0	0
10	30	9	5	2	8	0	6	0	5	2	2	0	2	2	1	2	2	1	0	0	2	2	2	2	2	0	0	2	2	2	0	0
17	32	11	6	0	6	0	5	4	150	1	1	2	3	2	2	2	3	1	0	0	0	1	2	2	1	0	0	2	1	2	3	1
20	40	14	6	1	9	1	8	1	25	2	2	1	3	3	3	3	3	0	0	0	1	2	2	3	2	0	1	3	2	3	1	0
4	15	6	2	0	2	1	3	1	0	1	1	1	1	1	1	1	1	0	0	0	0	1	0	0	1	0	1	1	1	1	1	0
7	24	10	3	1	1	1	6	2	10	2	1	0	3	2	2	0	3	0	1	0	0	1	0	0	0	1	0	2	2	2	1	1
11	24	11	4	0	1	2	5	1	5	1	0	2	3	2	3	1	2	1	0	0	0	0	0	0	1	0	2	2	2	1	1	0
11	23	8	7	0	3	0	5	0	10	2	0	0	2	3	1	3	2	2	0	0	0	1	1	0	1	0	0	2	1	2	0	0
13	23	13	2	0	3	0	3	2	10	1	2	2	3	3	2	0	2	0	0	0	0	1	0	2	0	0	0	1	1	1	2	0
9	20	6	6	0	3	0	5	0	10	0	0	0	2	2	2	3	2	1	0	0	0	3	0	0	0	0	0	1	2	2	0	0
12	25	9	3	0	4	2	5	2	2	1	1	0	3	2	2	1	1	1	0	0	0	1	0	2	1	2	0	1	2	2	1	1
7	22	14	0	0	7	0	0	1	2	3	2	2	2	3	2	0	0	0	0	0	0	3	1	1	2	0	0	0	0	0	1	0
16	36	9	9	0	10	0	5	3	5	1	0	1	2	3	2	3	3	3	0	0	0	2	2	3	3	0	0	1	2	2	2	1
9	23	8	5	0	3	2	4	1	10	1	1	1	1	2	2	2	2	1	0	0	0	1	0	1	1	1	1	1	2	1	1	0
8	18	10	0	1	3	0	2	2	16	2	1	1	2	2	2	0	0	0	1	0	0	1	0	2	0	0	0	0	2	0	1	1
16	43	15	4	2	8	4	8	2	25	2	2	3	3	2	3	1	2	1	1	0	1	2	1	3	2	2	2	2	3	3	1	1
16	41	14	5	1	8	2	7	4	10	2	3	2	3	2	2	2	2	1	0	0	1	2	1	2	3	1	1	2	2	3	2	2
7	19	8	5	0	3	2	1	0	0	1	1	1	2	2	1	2	1	2	0	0	0	2	0	0	1	1	1	0	1	0	0	0
11	32	14	6	1	3	1	5	2	20	2	1	3	3	3	2	2	3	1	0	0	1	1	0	1	1	0	1	2	2	1	2	0
14	40	12	8	3	6	2	8	1	25	1	2	2	3	3	1	3	3	2	0	1	2	1	2	2	1	0	2	2	3	3	1	0
7	22	10	5	2	2	1	2	0	5	2	1	2	2	2	1	2	2	1	1	0	1	0	0	1	1	0	1	1	1	0	0	0
9	20	5	5	0	0	2	7	1	15	0	0	0	1	2	2	2	3	0	0	0	0	0	0	0	0	1	1	2	3	2	1	0
11	27	7	5	1	4	1	7	2	0	1	1	1	3	1	0	2	3	0	0	0	1	2	2	0	0	0	1	3	2	2	2	0
17	36	15	7	1	6	0	5	2	12	2	3	1	3	3	3	2	3	2	0	0	1	2	0	2	2	0	0	2	2	1	2	0
0	16	10	0	0	0	0	4	2	5	3	1	1	1	2	2	0	0	0	0	0	0	0	0	0	0	0	0	1	1	2	0	2
14	27	8	8	0	3	3	3	2	20	1	0	0	2	2	3	3	3	2	0	0	0	1	0	0	2	1	2	1	0	2	2	0
15	35	12	7	0	5	2	8	1	5	1	2	3	2	2	2	3	3	1	0	0	0	1	1	2	1	1	1	3	3	2	1	0
6	15	5	3	1	1	0	3	2	21	1	0	0	1	1	2	1	2	0	1	0	0	0	0	0	1	0	0	1	1	1	2	0
5	38	17	5	0	8	3	5	0	40	3	2	3	3	3	3	3	2	0	0	0	0	2	3	1	2	1	2	2	1	2	0	0
17	16	6	0	3	3	0	4	0	10	1	0	3	0	2	0	0	0	0	1	0	2	2	0	1	0	0	0	1	0	3	0	0
11	18	4	9	0	1	0	3	1	3	0	0	0	2	1	1	3	3	3	0	0	0	1	0	0	0	0	0	1	1	1	1	0
16	29	11	8	1	6	0	2	1	20	0	1	1	3	3	3	3	3	2	0	0	1	1	1	2	2	0	0	0	1	1	0	1
18	37	13	3	4	5	2	6	4	8	3	2	0	3	2	3	0	2	1	1	1	2	1	0	2	2	0	2	2	2	2	2	2
9	22	7	4	0	3	3	4	1	25	0	1	0	2	2	2	1	2	1	0	0	0	2	0	0	1	1	2	1	1	2	1	0
13	29	12	9	0	2	2	2	2	10	1	1	2	2	3	3	3	3	3	0	0	0	1	0	1	0	1	1	0	1	1	1	1
12	23	6	5	0	7	0	2	3	1	1	0	0	1	2	2	3	1	1	0	0	0	3	1	1	2	0	0	0	1	1	3	0
8	30	12	2	2	3	3	4	4	15	2	1	1	2	3	3	1	1	0	1	0	1	2	0	1	0	1	2	2	1	1	2	2
18	36	13	3	4	8	2	2	4	100	2	1	2	3	3	2	1	1	1	2	1	1	2	1	3	2	1	1	1	1	0	2	2
11	8	3	3	0	0	0	2	0	6	0	0	0	1	1	1	1	1	1	0	0	0	0	0	0	0	0	0	1	1	0	0	0
9	36	14	5	1	6	2	6	2	6	2	3	2	3	3	1	2	3	0	0	0	1	2	1	1	2	0	2	2	2	2	2	0
13	24	14	4	0	1	0	5	0	10	2	0	3	3	3	3	0	3	1	0	0	0	1	0	0	0	0	0	2	1	2	0	0
4	18	7	6	0	0	0	4	1	5	1	1	0	0	3	2	3	3	0	0	0	0	0	0	0	0	0	0	1	2	1	1	0
14	16	4	4	2	1	1	2	2	2	0	0	0	0	1	3	1	3	0	1	0	1	1	0	0	0	0	1	1	1	0	1	1
16	31	10	3	3	5	1	7	2	10	2	1	0	2	3	2	1	1	1	1	1	1	2	1	1	1	0	1	2	3	2	1	1
13	11	4	3	0	2	0	1	1	5	1	0	0	1	1	1	1	1	1	0	0	0	1	0	1	0	0	0	0	1	0	0	1
15	23	5	8	0	6	0	3	1	40	0	0	0	1	2	2	3	3	2	0	0	0	2	2	2	0	0	0	2	0	1	1	0
14	20	8	8	0	2	0	1	1	5	2	0	2	1	2	1	3	3	2	0	0	0	1	0	1	0	0	0	0	0	1	1	0
12	34	9	8	0	9	2	4	2	5	1	0	0	2	3	3	3	3	2	0	0	0	1	2	3	3	2	0	1	2	1	2	0
20	38	14	4	0	7	4	6	3	25	2	2	1	3	3	3	2	2	0	0	0	0	2	2	2	1	1	3	2	2	2	2	1
13	18	9	3	0	3	0	3	0	3	1	0	1	2	2	3	1	1	1	0	0	0	1	0	1	1	0	0	1	0	2	0	0
10	26	14	3	0	2	1	4	2	20	2	2	3	3	1	3	1	1	1	0	0	0	0	0	1	1	0	1	1	2	1	1	1
12	30	7	7	0	2	4	6	4	50	1	0	1	1	2	2	2	3	2	0	0	0	0	0	1	1	2	2	2	2	2	2	2
9	14	3	6	0	1	0	4	0	6	0	0	0	1	1	1	3	1	2	0	0	0	1	0	0	0	0	0	2	2	0	0	0
5	13	4	4	0	1	1	2	1	0	1	0	1	1	0	1	1	2	1	0	0	0	1	0	0	0	0	1	1	0	1	1	0
5	16	5	6	1	2	0	2	0	20	0	1	0	2	1	1	2	2	2	0	0	1	1	0	1	0	0	0	0	2	0	0	0
8	18	6	5	0	0	2	4	1	5	1	1	1	1	1	1	2	2	1	0	0	0	0	0	0	0	1	1	1	1	2	1	0
7	17	7	3	2	1	0	2	2	10	2	1	2	1	1	0	1	2	0	1	0	1	1	0	0	0	0	0	0	1	1	2	0
18	30	13	1	1	7	2	2	4	12	2	2	1	3	2	3	0	1	0	1	0	0	2	2	2	1	1	1	0	1	1	2	2
16	29	13	6	0	7	0	2	1	10	2	2	1	3	2	3	2	3	1	0	0	0	2	1	2	2	0	0	0	2	0	1	0
14	31	14	6	0	5	1	4	1	5	2	1	3	2	3	3	2	2	2	0	0	0	1	1	2	1	0	1	2	1	1	1	0
5	23	12	6	0	4	0	1	0	2	3	0	0	3	3	3	3	3	0	0	0	0	3	0	1	0	0	0	0	1	0	0	0
15	27	10	4	2	4	0	6	1	20	2	0	2	2	2	2	1	3	0	1	0	1	2	0	2	0	0	0	2	2	2	1	0
13	34	16	7	0	3	2	4	2	30	3	2	2	3	3	3	2	3	2	0	0	0	1	0	1	1	1	1	1	2	1	1	1
4	21	14	2	0	1	0	4	0	5	2	1	3	3	2	3	0	2	0	0	0	0	0	0	1	0	0	0	1	3	0	0	0
8	13	5	4	0	2	0	2	0	5	1	0	0	2	1	1	2	2	0	0	0	0	1	0	1	0	0	0	1	0	1	0	0
10	30	13	3	1	4	3	5	1	10	2	2	1	2	3	3	1	1	1	0	0	1	2	0	1	1	1	2	2	1	2	1	0
14	23	14	3	0	2	0	3	1	50	3	2	3	2	2	2	1	2	0	0	0	0	1	1	0	0	0	0	1	1	1	1	0
12	26	9	5	2	5	0	5	0	35	1	0	1	2	2	3	2	2	1	1	0	1	1	1	1	2	0	0	2	2	1	0	0
11	18	6	5	0	1	1	3	2	10	1	1	1	0	1	2	2	2	1	0	0	0	0	0	0	1	0	1	1	1	1	1	1
9	28	10	5	0	2	2	6	3	50	1	0	1	2	3	3	2	2	1	0	0	0	1	0	1	0	1	1	2	2	2	2	1
11	27	11	3	1	6	0	4	2	20	1	1	0	3	3	3	1	2	0	0	0	1	2	1	3	0	0	0	1	1	2	2	0
14	16	6	0	1	3	3	3	0	5	1	1	2	1	1	0	0	0	0	0	0	1	0	1	0	2	1	2	1	1	1	0	0
10	19	8	5	0	4	0	1	1	5	1	1	0	2	2	2	2	2	1	0	0	0	1	1	1	1	0	0	0	0	1	0	1
14	18	10	5	1	1	0	1	0	10	1	1	1	2	2	3	2	2	1	1	0	0	1	0	0	0	0	0	0	0	1	0	0
5	13	5	5	0	1	1	1	0	1	1	1	0	2	1	0	2	2	1	0	0	0	1	0	0	0	1	0	0	1	0	0	0
14	33	12	5	1	9	0	5	1	5	2	2	1	2	2	3	2	2	1	0	0	1	2	2	3	2	0	0	1	2	2	1	0
14	31	14	5	0	4	0	6	2	5	1	2	2	3	3	3	3	2	0	0	0	0	1	0	1	2	0	0	1	2	3	2	0
12	33	11	3	0	5	4	6	4	50	2	1	1	2	3	2	1	2	0	0	0	0	0	1	2	2	2	2	2	2	2	2	2
17	34	15	2	4	7	1	5	0	20	3	2	3	2	2	3	1	1	0	1	1	2	2	1	2	2	0	1	2	2	1	0	0
13	13	3	3	0	2	1	3	1	0	0	0	0	1	1	1	1	1	1	0	0	0	0	0	1	1	0	1	1	1	1	1	0
16	29	14	5	1	5	0	3	1	10	2	1	2	3	3	3	1	3	1	0	0	1	2	0	1	2	0	0	1	1	1	1	0
12	14	3	5	0	2	1	3	0	10	1	0	0	0	1	1	2	2	1	0	0	0	0	0	1	1	0	1	1	1	1	0	0
8	18	7	2	1	4	0	2	2	10	1	1	0	2	1	2	0	2	0	1	0	0	2	0	2	0	0	0	0	1	1	2	0
7	31	9	8	0	3	4	6	1	25	1	1	1	3	2	1	3	2	3	0	0	0	2	1	0	0	2	2	1	3	2	0	1
11	17	5	6	0	2	0	3	1	10	1	0	0	2	1	1	2	2	2	0	0	0	1	0	0	1	0	0	0	2	1	1	0
12	29	6	5	2	7	1	5	3	10	0	1	0	2	2	1	2	2	1	0	1	1	2	2	2	1	1	0	2	2	1	1	2
8	10	5	0	0	1	1	3	0	8	1	1	0	1	1	1	0	0	0	0	0	0	1	0	0	0	0	1	1	1	1	0	0
16	31	10	5	1	9	0	4	2	10	0	1	2	2	2	3	2	2	1	0	0	1	2	2	3	2	0	0	1	1	2	1	1
6	13	6	3	0	1	0	2	1	5	1	1	1	1	1	1	1	1	1	0	0	0	1	0	0	0	0	0	0	1	1	0	1
13	28	11	5	0	5	1	3	3	15	2	1	1	2	2	3	2	2	1	0	0	0	2	1	1	1	0	1	1	1	1	2	1
8	26	11	6	0	2	3	4	0	20	1	2	2	1	2	3	1	2	3	0	0	0	1	0	0	1	2	1	1	2	1	0	0
13	25	9	7	0	4	1	3	1	10	1	1	1	2	2	2	3	3	1	0	0	0	1	1	2	0	0	1	1	0	2	1	0
19	35	13	3	3	8	0	8	0	10	1	2	1	3	3	3	1	1	1	1	0	2	2	2	2	2	0	0	3	2	3	0	0
12	25	10	4	0	2	3	6	0	20	2	0	0	2	3	3	1	2	1	0	0	0	0	0	0	2	1	2	2	2	2	0	0
18	28	9	3	2	7	1	3	3	30	1	1	2	1	3	1	1	2	0	1	0	1	1	3	2	1	1	0	1	1	1	3	0
15	35	12	6	1	8	0	7	1	100	2	3	1	2	3	1	2	3	1	0	0	1	2	2	3	1	0	0	2	2	3	1	0
15	28	6	9	0	8	0	3	2	5	0	0	0	2	2	2	3	3	3	0	0	0	2	2	2	2	0	0	1	1	1	2	0
12	20	8	1	2	1	4	4	0	15	2	2	1	1	1	1	0	1	0	0	0	2	0	0	1	0	2	2	2	1	1	0	0
15	35	14	3	2	7	2	6	1	5	3	3	1	1	3	3	1	1	1	0	0	2	2	1	2	2	1	1	2	2	2	1	0
0	16	5	3	3	2	0	0	3	1	1	1	0	1	1	1	1	1	1	1	1	1	1	1	0	0	0	0	0	0	0	2	1
7	24	12	4	1	3	0	4	0	5	2	1	1	2	3	3	2	2	0	1	0	0	1	0	1	1	0	0	1	2	1	0	0
10	22	7	6	0	4	0	3	2	5	2	0	0	2	2	1	2	2	2	0	0	0	1	1	1	1	0	0	1	1	1	2	0
5	15	6	0	0	0	4	3	2	0	2	1	3	0	0	0	0	0	0	0	0	0	0	0	0	0	2	2	1	1	1	1	1
13	39	14	7	0	8	0	7	3	30	2	2	1	3	3	3	2	3	2	0	0	0	2	2	2	2	0	0	2	2	3	3	0
8	29	12	3	1	6	0	4	3	90	2	1	2	3	2	2	1	2	0	1	0	0	2	1	2	1	0	0	2	1	1	1	2
13	18	5	7	0	4	0	1	1	40	0	0	0	1	2	2	3	3	1	0	0	0	1	1	0	2	0	0	0	1	0	0	1
7	19	10	0	0	2	1	2	4	20	3	0	1	2	2	2	0	0	0	0	0	0	1	0	0	1	1	0	1	0	1	2	2
1	17	9	4	0	1	0	2	1	5	2	1	0	3	2	1	1	2	1	0	0	0	0	0	0	1	0	0	1	0	1	1	0
14	30	13	7	0	4	0	4	2	10	2	2	3	2	2	2	2	3	2	0	0	0	1	1	1	1	0	0	0	2	2	2	0
12	28	13	7	0	6	0	2	0	5	2	3	3	2	1	2	2	3	2	0	0	0	1	1	2	2	0	0	1	1	0	0	0
4	19	9	2	1	3	1	3	0	5	1	1	1	2	3	1	0	2	0	1	0	0	2	1	0	0	0	1	1	1	1	0	0
10	26	12	3	0	2	5	4	0	16	1	1	2	3	2	3	2	1	0	0	0	0	1	0	0	1	3	2	1	2	1	0	0
10	21	9	4	1	2	1	1	3	10	1	1	1	2	2	2	2	1	1	0	0	1	0	0	1	1	1	0	0	0	1	2	1
4	32	15	7	0	4	2	2	2	5	3	2	2	3	2	3	3	3	1	0	0	0	1	1	1	1	1	1	0	1	1	1	1
10	20	7	6	0	1	1	3	2	10	1	0	1	2	1	2	2	2	2	0	0	0	0	0	1	0	1	0	1	1	1	1	1
7	17	6	4	0	1	5	0	1	10	1	0	0	2	1	2	2	1	1	0	0	0	1	0	0	0	3	2	0	0	0	1	0
11	29	6	6	2	4	3	4	4	10	1	0	2	1	1	1	3	2	1	0	1	1	1	1	0	2	2	1	1	2	1	2	2
13	24	8	5	0	5	0	5	1	5	0	1	1	2	2	2	2	2	1	0	0	0	2	1	2	0	0	0	1	2	2	1	0
13	27	9	4	0	6	2	3	3	40	1	1	1	2	2	2	2	2	0	0	0	0	1	1	2	2	1	1	1	1	1	2	1
11	18	6	0	4	3	0	3	2	3	1	0	1	1	2	1	0	0	0	2	0	2	3	0	0	0	0	0	2	0	1	0	2
14	33	8	7	1	9	2	3	3	5	1	1	1	1	2	2	2	3	2	0	0	1	2	2	2	3	1	1	1	2	0	2	1
16	43	14	7	3	5	3	9	2	10	3	2	2	1	3	3	2	3	2	0	1	2	1	1	3	0	1	2	3	3	3	1	1
10	26	11	0	1	4	4	6	0	10	1	1	3	1	2	3	0	0	0	0	0	1	2	0	1	1	2	2	2	2	2	0	0
12	25	10	1	1	2	3	6	2	50	2	2	2	1	2	1	0	1	0	1	0	0	1	0	1	0	1	2	2	2	2	1	1
13	26	9	5	1	3	1	5	2	10	1	1	1	2	2	2	2	2	1	0	0	1	1	0	1	1	0	1	1	2	2	2	0
15	29	13	4	0	7	0	3	2	50	0	3	3	1	3	3	0	3	1	0	0	0	2	2	2	1	0	0	0	2	1	2	0
5	15	5	7	0	0	0	3	0	5	1	0	2	1	1	0	2	2	3	0	0	0	0	0	0	0	0	0	0	2	1	0	0
14	28	11	3	1	7	0	5	1	20	3	0	1	2	2	3	1	2	0	0	0	1	2	2	2	1	0	0	2	2	1	1	0
16	32	11	2	6	5	1	6	1	50	2	1	1	2	2	3	0	1	1	2	2	2	1	1	2	1	1	0	2	2	2	1	0
9	27	10	2	4	2	3	4	2	12	1	1	2	2	2	2	1	1	0	1	1	2	0	0	1	1	1	2	1	1	2	2	0
15	27	11	6	1	4	0	4	1	15	1	2	1	2	2	3	1	3	2	0	0	1	1	0	2	1	0	0	1	2	1	1	0
7	31	11	5	3	5	3	2	2	15	1	2	0	3	2	3	3	2	0	1	2	0	2	1	2	0	1	2	1	1	0	1	1
5	13	3	6	0	1	1	2	0	10	0	0	0	1	1	1	3	3	0	0	0	0	1	0	0	0	0	1	1	1	0	0	0
14	34	12	8	1	4	2	4	3	5	2	1	2	3	2	2	3	3	2	0	0	1	1	1	1	1	1	1	2	1	1	2	1
13	18	9	1	1	2	1	4	0	5	1	1	1	2	2	2	0	1	0	0	0	1	1	0	1	0	0	1	1	1	2	0	0
14	29	6	7	1	4	2	5	4	15	0	0	2	1	2	1	3	2	2	0	0	1	1	0	1	2	1	1	2	2	1	2	2
16	27	9	2	7	6	0	3	0	20	2	3	0	0	3	1	0	1	1	2	2	3	0	2	2	2	0	0	0	1	2	0	0
9	22	12	1	0	3	1	1	4	20	3	1	2	2	2	2	0	1	0	0	0	0	2	0	1	0	0	1	0	0	1	2	2
8	20	13	2	0	1	3	1	0	20	3	2	1	1	3	3	0	2	0	0	0	0	1	0	0	0	0	3	0	1	0	0	0
6	21	8	4	0	3	2	3	1	10	2	1	1	1	2	1	2	1	1	0	0	0	1	0	1	1	1	1	1	1	1	1	0
5	19	8	4	0	1	1	2	3	5	1	1	1	2	2	1	2	2	0	0	0	0	0	0	1	0	1	0	1	0	1	2	1
14	35	13	4	1	6	2	5	4	20	2	3	1	3	2	2	1	2	1	0	0	1	2	1	2	1	1	1	1	2	2	2	2
12	29	10	6	0	4	2	7	0	3	1	1	2	2	2	2	2	3	1	0	0	0	2	0	1	1	1	1	2	3	2	0	0
6	17	4	6	0	2	0	5	0	20	0	0	0	2	2	0	3	3	0	0	0	0	1	1	0	0	0	0	2	1	2	0	0
17	41	15	8	0	8	3	5	2	20	3	1	2	3	3	3	3	2	3	0	0	0	3	2	2	1	1	2	1	2	2	1	1
10	13	6	0	0	1	1	2	3	5	3	0	1	0	1	1	0	0	0	0	0	0	1	0	0	0	0	1	1	0	1	2	1
14	28	9	8	0	6	0	5	0	50	1	0	1	2	3	2	3	3	2	0	0	0	2	1	2	1	0	0	2	2	1	0	0
6	9	1	6	0	1	0	1	0	5	0	0	0	1	0	0	3	1	2	0	0	0	1	0	0	0	0	0	0	1	0	0	0
1	6	2	3	0	1	0	0	0	3	0	0	0	1	1	0	0	3	0	0	0	0	1	0	0	0	0	0	0	0	0	0	0
11	25	6	8	3	4	0	1	3	1	0	0	0	3	1	2	3	2	3	0	0	3	3	0	1	0	0	0	0	0	1	3	0
14	31	10	3	3	6	0	6	3	230	1	1	0	2	3	3	1	1	1	2	0	1	2	2	2	0	0	0	2	2	2	3	0
9	10	3	5	0	0	0	2	0	5	0	0	0	1	1	1	2	2	1	0	0	0	0	0	0	0	0	0	1	0	1	0	0
11	31	16	7	0	2	1	4	1	50	3	2	3	2	3	3	3	2	2	0	0	0	1	0	1	0	1	0	1	2	1	1	0
3	13	6	2	0	2	2	1	0	5	0	0	0	3	1	2	0	2	0	0	0	0	1	0	1	0	1	1	0	1	0	0	0
15	30	6	8	0	8	2	6	0	10	1	0	0	3	2	0	3	3	2	0	0	0	2	2	2	2	1	1	2	2	2	0	0
19	21	10	3	0	1	0	7	0	50	0	0	2	2	3	3	0	2	1	0	0	0	1	0	0	0	0	0	3	3	1	0	0
7	20	8	6	0	0	0	6	0	0	1	0	1	2	2	2	3	2	1	0	0	0	0	0	0	0	0	0	2	2	2	0	0
14	50	14	7	9	6	3	7	4	20	2	1	2	3	3	3	3	2	2	3	3	3	2	1	1	2	2	1	3	2	2	2	2
14	30	9	8	0	4	0	7	2	60	1	1	2	1	2	2	3	3	2	0	0	0	0	1	1	2	0	0	2	3	2	2	0
6	18	8	3	0	2	1	3	1	20	2	0	0	2	2	2	1	2	0	0	0	0	1	0	1	0	0	1	1	1	1	1	0
0	16	6	4	0	2	0	4	0	3	2	0	0	2	2	0	2	2	0	0	0	0	2	0	0	0	0	0	2	0	2	0	0
13	36	14	3	2	6	2	6	3	50	3	1	2	3	3	2	1	0	2	1	0	1	2	3	0	1	2	0	3	2	1	0	3
5	7	1	3	0	0	1	1	1	0	0	0	0	0	1	0	1	1	1	0	0	0	0	0	0	0	0	1	0	1	0	1	0
16	20	11	3	0	3	0	3	0	20	2	1	0	2	3	3	0	2	1	0	0	0	2	0	0	1	0	0	2	0	1	0	0
10	22	10	2	0	4	1	3	2	50	1	1	2	2	2	2	0	2	0	0	0	0	2	0	1	1	0	1	0	1	2	2	0
10	14	7	0	0	1	0	6	0	0	0	0	2	1	2	2	0	0	0	0	0	0	1	0	0	0	0	0	2	2	2	0	0
9	21	6	5	0	3	2	4	1	0	1	0	1	2	1	1	2	1	2	0	0	0	1	0	1	1	2	0	1	1	2	1	0
4	27	11	3	0	1	4	7	1	5	3	2	2	1	0	3	0	2	1	0	0	0	1	0	0	0	2	2	2	3	2	1	0
10	23	7	6	1	2	0	5	2	15	1	0	1	1	2	2	2	3	1	1	0	0	2	0	0	0	0	0	2	1	2	1	1
8	19	8	3	0	2	2	4	0	10	0	0	1	3	2	2	0	2	1	0	0	0	1	0	1	0	1	1	1	2	1	0	0
11	30	10	0	4	7	2	6	1	15	3	2	1	1	2	1	0	0	0	1	1	2	1	2	2	2	1	1	2	2	2	1	0
9	22	5	4	2	5	0	6	0	2	1	0	0	2	1	1	2	2	0	1	0	1	1	2	2	0	0	0	2	3	1	0	0
13	30	10	5	2	5	2	5	1	20	1	1	1	3	2	2	2	2	1	1	0	1	2	0	1	2	1	1	2	2	1	1	0
9	25	12	0	0	5	0	4	4	10	2	1	2	2	3	2	0	0	0	0	0	0	1	1	1	2	0	0	1	1	2	2	2
15	27	13	3	0	6	0	4	1	10	2	1	1	3	3	3	1	1	1	0	0	0	1	1	2	2	0	0	1	2	1	1	0
13	39	15	5	1	7	3	5	3	30	2	2	2	3	3	3	1	3	1	1	0	0	1	1	2	3	1	2	2	1	2	1	2
10	19	9	4	0	1	2	3	0	3	2	1	1	1	2	2	1	2	1	0	0	0	1	0	0	0	1	1	1	1	1	0	0
14	14	5	5	0	2	0	1	1	5	1	0	0	1	2	1	2	2	1	0	0	0	0	1	1	0	0	0	1	0	0	1	0
6	15	8	4	0	0	0	3	0	10	0	0	3	2	2	1	2	2	0	0	0	0	0	0	0	0	0	0	1	1	1	0	0
13	26	13	6	0	2	1	3	1	150	2	1	1	3	3	3	2	3	1	0	0	0	0	0	1	1	1	0	0	2	1	1	0
13	28	15	0	0	5	1	6	1	5	3	1	2	3	3	3	0	0	0	0	0	0	2	0	2	1	0	1	1	2	3	0	1
13	33	9	2	6	7	2	4	3	1	2	0	0	2	3	2	0	1	1	2	1	3	2	2	2	1	1	1	1	1	2	0	3
17	36	16	3	2	6	2	6	1	10	3	2	2	3	3	3	1	1	1	1	0	1	2	1	2	1	1	1	2	2	2	1	0
14	31	12	4	2	5	2	4	2	5	2	2	2	2	2	2	1	2	1	1	0	1	1	1	2	1	1	1	2	1	1	1	1
10	25	9	5	0	5	1	4	1	10	1	1	1	2	2	2	2	2	1	0	0	0	2	1	1	1	0	1	2	1	1	1	0
3	9	0	5	0	0	4	0	0	0	0	0	0	0	0	0	1	3	1	0	0	0	0	0	0	0	1	3	0	0	0	0	0
9	19	4	6	0	4	2	2	1	10	0	0	0	1	1	2	3	2	1	0	0	0	2	0	1	1	1	1	1	0	1	0	1
13	31	11	8	1	5	0	4	2	10	1	0	2	3	2	3	3	3	2	0	0	1	2	1	2	0	0	0	1	1	2	2	0
11	25	5	8	0	5	0	5	2	0	0	0	0	1	2	2	3	3	2	0	0	0	2	3	0	0	0	0	2	2	1	2	0
10	30	15	4	1	3	3	4	0	5	3	2	2	3	2	3	1	3	0	0	0	1	0	0	3	0	0	3	1	1	2	0	0
11	32	9	8	0	7	2	6	0	40	0	0	2	2	3	2	3	2	3	0	0	0	2	3	2	0	0	2	3	0	3	0	0
8	24	11	2	0	2	3	4	2	10	3	1	2	1	2	2	0	2	0	0	0	0	1	0	1	0	1	2	2	1	1	1	1
16	34	11	2	3	7	2	6	3	10	2	1	1	3	2	2	1	1	0	2	0	1	2	2	2	1	1	1	2	2	2	2	1
11	8	0	1	1	1	2	2	1	50	0	0	0	0	0	0	0	0	1	1	0	0	1	0	0	0	1	1	0	1	1	0	1
5	20	8	4	0	3	4	1	0	3	1	0	0	2	2	3	1	3	0	0	0	0	1	0	0	2	2	2	1	0	0	0	0
12	18	7	4	0	2	1	3	1	60	1	0	1	2	1	2	1	2	1	0	0	0	1	0	0	1	1	0	1	1	1	1	0
16	34	12	6	0	5	2	6	3	20	1	1	2	3	2	3	3	3	0	0	0	0	2	1	2	0	1	1	2	2	2	3	0
4	29	11	8	1	3	0	6	0	20	1	1	2	2	3	2	3	3	2	0	0	1	2	0	0	1	0	0	2	2	2	0	0
12	18	7	6	1	0	0	3	1	2.5	0	0	0	3	2	2	3	2	1	0	0	1	0	0	0	0	0	0	1	1	1	1	0
12	38	16	1	7	6	0	4	4	20	3	3	2	3	3	2	0	0	1	2	2	3	2	1	2	1	0	0	1	2	1	2	2
11	11	3	1	0	3	4	0	0	100	1	0	1	1	0	0	0	1	0	0	0	0	1	0	1	1	2	2	0	0	0	0	0
9	12	4	0	0	4	2	2	0	2	1	0	0	1	1	1	0	0	0	0	0	0	1	1	1	1	1	1	1	0	1	0	0
15	25	12	0	0	5	1	6	1	7	2	0	2	2	3	3	0	0	0	0	0	0	1	0	2	2	1	0	2	2	2	0	1
15	26	13	7	0	3	0	2	1	10	2	2	0	3	3	3	2	3	2	0	0	0	1	0	2	0	0	0	0	1	1	0	1
0	3	0	1	0	1	0	1	0	0	0	0	0	0	0	0	0	1	0	0	0	0	0	0	0	1	0	0	1	0	0	0	0
10	14	6	0	0	3	1	2	2	20	1	1	0	1	2	1	0	0	0	0	0	0	1	0	1	1	0	1	1	1	0	2	0
13	17	10	1	0	2	0	4	0	2	3	1	0	2	2	2	0	1	0	0	0	0	1	0	1	0	0	0	2	1	1	0	0
9	27	12	0	0	4	3	5	3	20	2	2	1	2	3	2	0	0	0	0	0	0	2	1	1	0	1	2	2	1	2	0	3
13	18	8	0	1	2	1	6	0	5	2	1	0	2	1	2	0	0	0	0	0	1	1	0	0	1	1	0	2	2	2	0	0
13	50	14	8	4	7	4	8	5	15	2	3	2	2	2	3	2	3	3	0	1	3	1	2	2	2	1	3	3	3	2	3	2
12	42	13	7	4	7	4	4	3	1	2	2	2	2	2	3	3	3	1	1	1	2	1	2	2	2	2	2	1	1	2	1	2
5	17	8	3	0	2	0	3	1	4	2	0	0	2	2	2	2	1	0	0	0	0	1	0	1	0	0	0	1	1	1	1	0
12	21	9	5	0	3	0	3	1	50	1	1	1	2	2	2	1	3	1	0	0	0	1	0	2	0	0	0	0	1	2	0	1
15	31	10	6	0	7	1	6	1	5	1	1	1	3	3	1	2	2	2	0	0	0	2	2	1	2	1	0	2	2	2	0	1
4	23	6	3	3	4	2	3	2	0	1	1	1	1	1	1	1	1	1	1	1	1	1	1	1	1	1	1	1	1	1	1	1
10	27	9	6	0	7	0	5	0	5	1	1	1	2	2	2	2	3	1	0	0	0	1	2	2	2	0	0	1	2	2	0	0
15	31	11	5	0	6	2	6	1	5	2	1	2	2	2	2	2	1	2	0	0	0	1	1	2	2	2	0	2	2	2	1	0
17	32	13	8	0	7	0	4	0	15	1	2	2	2	3	3	3	3	2	0	0	0	2	1	2	2	0	0	1	2	1	0	0
14	27	10	4	5	1	3	3	1	40	2	0	1	3	2	2	1	2	1	1	2	2	1	0	0	0	1	2	1	1	1	1	0
5	14	9	0	0	1	3	1	0	10	1	1	2	2	2	1	0	0	0	0	0	0	1	0	0	0	2	1	0	1	0	0	0
15	30	10	8	0	4	1	5	2	10	1	0	1	2	3	3	3	3	2	0	0	0	1	1	1	1	0	1	2	2	1	1	1
17	32	18	3	0	1	1	4	5	15	3	3	3	3	3	3	1	1	1	0	0	0	0	0	0	1	1	0	1	1	2	2	3
6	16	5	0	0	4	2	5	0	20	3	0	1	0	0	1	0	0	0	0	0	0	1	2	1	0	2	0	2	1	2	0	0
7	24	8	6	0	3	1	5	1	10	1	1	1	2	1	2	2	2	2	0	0	0	1	0	1	1	1	0	2	2	1	1	0
0	1	1	0	0	0	0	0	0	0	1	0	0	0	0	0	0	0	0	0	0	0	0	0	0	0	0	0	0	0	0	0	0
14	33	15	8	0	2	0	6	2	10	3	1	2	3	3	3	3	3	2	0	0	0	1	0	1	0	0	0	2	2	2	2	0
10	31	13	8	0	4	0	5	1	10	2	1	2	3	3	2	3	3	2	0	0	0	1	1	2	0	0	0	1	2	2	1	0
16	40	15	3	5	6	3	4	4	60	2	2	3	3	2	3	1	1	1	2	1	2	1	1	2	2	1	2	2	1	1	2	2
12	21	10	4	0	1	2	3	1	10	3	1	1	2	1	2	2	1	1	0	0	0	0	0	1	0	1	1	1	1	1	0	1
12	19	7	6	0	2	0	4	0	5	1	1	1	1	2	1	2	2	2	0	0	0	0	1	1	0	0	0	2	1	1	0	0
10	21	8	7	0	5	0	1	0	5	0	1	1	3	2	1	3	2	2	0	0	0	2	1	1	1	0	0	0	0	1	0	0
17	32	12	4	1	8	0	3	4	20	1	1	2	2	3	3	1	2	1	1	0	0	0	2	3	3	0	0	1	1	1	2	2
10	10	3	5	1	1	0	0	0	2	1	0	0	1	1	0	2	2	1	1	0	0	1	0	0	0	0	0	0	0	0	0	0
17	44	14	8	2	11	1	7	1	100	3	1	2	3	3	2	3	3	2	0	0	2	3	3	3	2	1	0	2	2	3	0	1
9	16	8	0	0	3	1	3	1	5	1	0	1	2	2	2	0	0	0	0	0	0	1	1	1	0	1	0	1	2	0	1	0
14	28	14	5	0	1	4	4	0	20	2	3	3	2	2	2	1	2	2	0	0	0	0	0	0	1	2	2	1	2	1	0	0
4	17	8	2	0	0	2	4	1	0	2	1	1	2	2	0	0	2	0	0	0	0	0	0	0	0	1	1	1	1	2	1	0
10	20	1	8	1	4	0	5	1	2	0	0	1	0	0	0	3	3	2	0	0	1	2	0	0	2	0	0	2	1	2	1	0
6	23	15	0	0	2	1	3	2	0	3	1	3	2	3	3	0	0	0	0	0	0	1	0	1	0	0	1	0	2	1	0	2
10	28	9	5	0	6	4	4	0	10	1	1	0	3	2	2	2	3	0	0	0	0	1	1	2	2	2	2	1	1	2	0	0
12	25	10	5	0	2	2	5	1	10	2	0	1	3	2	2	2	2	1	0	0	0	0	1	1	0	1	1	1	2	2	1	0
16	20	6	5	0	6	1	1	1	0	1	0	0	1	2	2	2	2	1	0	0	0	1	1	2	2	0	1	1	0	0	1	0
11	29	9	6	1	2	3	6	2	20	1	0	1	3	3	1	2	3	1	0	0	1	1	0	0	1	1	2	2	3	1	1	1
13	27	13	3	1	4	1	5	0	80	2	1	2	3	2	3	1	1	1	0	0	1	2	0	1	1	0	1	2	2	1	0	0
11	26	11	5	0	3	0	5	2	0	0	0	3	2	3	3	2	3	0	0	0	0	2	0	1	0	0	0	2	1	2	2	0
14	23	5	0	5	4	1	6	2	8	1	1	1	1	1	0	0	0	0	2	1	2	1	1	1	1	0	1	3	1	2	0	2
1	12	3	6	0	0	0	3	0	9.99	0	0	0	0	2	1	2	2	2	0	0	0	0	0	0	0	0	0	1	1	1	0	0
4	10	2	5	0	0	0	3	0	8.99	0	0	0	1	1	0	2	2	1	0	0	0	0	0	0	0	0	0	1	1	1	0	0
14	27	14	0	3	6	0	4	0	30	1	2	2	3	3	3	0	0	0	2	0	1	2	0	2	2	0	0	0	2	2	0	0
9	20	12	2	0	1	0	5	0	2	0	1	2	3	3	3	0	2	0	0	0	0	1	0	0	0	0	0	2	1	2	0	0
3	19	11	0	1	1	0	6	0	10	2	2	1	2	2	2	0	0	0	0	0	1	1	0	0	0	0	0	2	2	2	0	0
11	28	11	6	1	5	1	2	2	19	1	2	2	2	2	2	3	2	1	0	0	1	1	1	1	2	0	1	1	1	0	2	0
4	20	4	3	0	2	2	5	4	5	1	0	1	0	1	1	1	2	0	0	0	0	1	0	0	1	1	1	1	2	2	2	2
14	27	9	5	0	5	0	5	3	200	0	1	1	1	3	3	1	3	1	0	0	0	2	2	1	0	0	0	1	2	2	3	0
15	40	11	5	6	8	2	4	4	20	2	2	1	2	2	2	2	2	1	2	2	2	2	2	2	2	1	1	1	1	2	2	2
15	31	12	6	1	3	2	5	2	20	2	2	2	1	2	3	2	2	2	0	0	1	1	1	1	0	1	1	1	2	2	0	2
15	19	5	5	0	3	2	2	2	30	0	0	1	1	1	2	1	3	1	0	0	0	1	0	0	2	0	2	0	1	1	2	0
11	24	9	2	0	7	1	3	2	6	2	2	1	2	1	1	1	1	0	0	0	0	2	2	1	2	1	0	1	1	1	1	1
11	38	14	4	2	5	4	7	2	15	2	2	2	3	3	2	1	2	1	2	0	0	1	0	2	2	2	2	1	3	3	2	0
10	34	16	7	0	6	1	2	2	20	3	2	2	3	3	3	2	3	2	0	0	0	1	0	2	3	0	1	1	1	0	1	1
9	28	12	2	1	2	1	5	5	5	2	2	2	2	2	2	1	1	0	0	0	1	1	0	1	0	0	1	1	2	2	2	3
16	43	11	7	5	10	2	6	2	10	1	1	2	1	3	3	2	3	2	1	2	2	3	1	3	3	1	1	2	2	2	2	0
1	13	5	4	0	1	2	1	0	5	1	0	0	1	1	2	2	1	1	0	0	0	1	0	0	0	0	2	1	0	0	0	0
15	33	11	4	1	4	2	7	4	20	3	2	1	2	1	2	1	2	1	1	0	0	1	0	2	1	1	1	2	3	2	2	2
17	37	12	4	6	7	0	6	2	100	1	2	1	2	3	3	1	2	1	2	2	2	1	2	3	1	0	0	2	2	2	1	1
11	36	13	3	4	6	2	5	3	10	2	1	2	3	2	3	1	2	0	1	1	2	2	1	2	1	1	1	1	2	2	1	2
9	27	12	3	0	6	0	6	0	5	3	0	0	3	3	3	2	1	0	0	0	0	2	0	3	1	0	0	3	0	3	0	0
11	25	8	2	1	5	0	7	2	1	1	1	1	0	2	3	0	2	0	0	0	1	0	1	2	2	0	0	2	2	3	1	1
15	30	15	1	1	7	0	0	6	20	2	3	3	1	3	3	0	1	0	0	0	1	2	0	2	3	0	0	0	0	0	3	3
15	43	18	7	0	7	3	5	3	100	3	3	3	3	3	3	3	3	1	0	0	0	2	1	2	2	1	2	2	1	2	2	1
12	35	12	6	1	7	0	6	3	10	3	1	1	3	2	2	2	2	2	0	0	1	1	1	3	2	0	0	2	2	2	2	1
9	29	11	7	0	6	1	3	1	20	2	0	1	3	3	2	2	3	2	0	0	0	3	0	2	1	1	0	1	1	1	1	0
9	19	10	0	0	3	1	1	4	50	1	1	2	2	2	2	0	0	0	0	0	0	1	1	1	0	0	1	0	1	0	2	2
5	13	4	4	0	1	0	2	2	2	1	0	0	1	1	1	2	2	0	0	0	0	1	0	0	0	0	0	1	1	0	1	1
13	28	11	3	1	5	3	5	0	20	2	0	1	3	2	3	1	2	0	0	0	1	2	1	1	1	0	3	2	1	2	0	0
11	18	9	2	0	3	2	2	0	20	1	1	2	2	2	1	0	2	0	0	0	0	0	1	1	1	1	1	0	0	2	0	0
10	12	7	0	0	1	1	3	0	7	2	0	0	1	2	2	0	0	0	0	0	0	0	0	1	0	0	1	1	1	1	0	0
10	14	5	0	0	4	1	2	2	3	2	0	1	2	0	0	0	0	0	0	0	0	2	1	1	0	0	1	1	0	1	2	0
12	35	10	5	1	7	2	9	1	10	1	1	0	2	3	3	1	2	2	0	0	1	2	1	2	2	0	2	3	3	3	1	0
10	10	0	3	0	0	3	4	0	5	0	0	0	0	0	0	1	1	1	0	0	0	0	0	0	0	1	2	1	1	2	0	0
13	41	7	6	3	10	5	6	4	3	1	1	1	1	1	2	2	3	1	2	0	1	3	1	3	3	3	2	2	2	2	2	2
14	35	14	4	1	4	2	7	3	0	3	1	2	2	3	3	1	2	1	0	0	1	2	1	0	1	0	2	2	3	2	1	2
8	23	4	8	0	6	0	3	2	2	0	0	0	1	1	2	3	3	2	0	0	0	1	2	2	1	0	0	0	2	1	2	0
12	30	11	4	1	6	2	4	2	50	2	2	3	1	1	2	0	3	1	0	0	1	2	1	2	1	1	1	0	2	2	0	2
4	13	4	3	0	3	1	2	0	30	0	0	0	3	0	1	2	1	0	0	0	0	1	1	0	1	0	1	1	1	0	0	0
18	35	12	4	3	8	0	5	3	45	1	2	3	1	2	3	1	1	2	1	1	1	2	2	3	1	0	0	1	2	2	2	1
14	31	11	8	2	1	1	4	4	5	2	0	1	2	3	3	3	3	2	1	0	1	0	0	1	0	0	1	1	2	1	2	2
12	26	11	4	1	2	0	4	4	5	0	1	2	3	3	2	1	3	0	1	0	0	1	0	1	0	0	0	2	1	1	3	1
3	12	4	3	0	2	0	3	0	2	1	0	0	1	1	1	1	1	1	0	0	0	0	1	0	1	0	0	1	1	1	0	0
8	26	10	4	0	2	2	4	4	1	2	1	1	2	2	2	2	2	0	0	0	0	1	0	1	0	1	1	1	1	2	2	2
15	27	12	6	0	3	0	6	0	5	3	0	3	2	2	2	2	2	2	0	0	0	2	0	1	0	0	0	2	2	2	0	0
13	39	11	4	0	11	4	6	3	10	1	2	2	1	2	3	0	2	2	0	0	0	2	3	3	3	2	2	2	1	3	2	1
9	12	4	3	0	2	0	3	0	2	0	0	1	1	1	1	1	2	0	0	0	0	1	0	1	0	0	0	2	0	1	0	0
11	4	2	1	0	0	0	1	0	10	0	0	0	0	1	1	1	0	0	0	0	0	0	0	0	0	0	0	0	1	0	0	0
15	22	6	1	0	9	0	3	3	250	2	0	0	1	2	1	0	1	0	0	0	0	2	3	3	1	0	0	0	1	2	3	0
8	29	9	5	3	2	2	4	4	56	1	1	2	2	2	1	2	2	1	1	1	1	1	0	1	0	1	1	2	1	1	2	2
5	21	7	4	0	1	3	5	1	20	1	1	1	1	2	1	1	2	1	0	0	0	1	0	0	0	1	2	2	2	1	1	0
18	54	15	7	3	12	4	9	4	45	1	2	3	3	3	3	3	3	1	3	0	0	3	3	3	3	3	1	3	3	3	3	1
14	24	10	0	1	7	0	5	1	30	2	2	1	2	2	1	0	0	0	0	0	1	2	2	2	1	0	0	1	2	2	1	0
7	16	8	2	0	0	1	5	0	5	0	1	2	2	2	1	2	0	0	0	0	0	0	0	0	0	0	1	2	3	0	0	0
14	35	11	2	1	8	3	4	6	0	2	2	1	0	3	3	1	1	0	1	0	0	2	2	2	2	1	2	1	1	2	3	3
10	30	11	2	4	3	4	4	2	100	1	1	2	2	3	2	1	1	0	2	1	1	2	0	0	1	2	2	2	1	1	0	2
3	11	9	0	0	0	0	1	1	2	2	0	1	2	2	2	0	0	0	0	0	0	0	0	0	0	0	0	1	0	0	0	1
14	24	7	7	0	3	0	5	2	10	0	1	1	2	1	2	3	2	2	0	0	0	1	0	1	1	0	0	2	1	2	2	0
9	19	10	3	0	4	0	0	2	30	0	2	0	3	2	3	0	3	0	0	0	0	2	0	2	0	0	0	0	0	0	2	0
7	13	6	0	0	2	1	4	0	0	2	1	1	1	1	0	0	0	0	0	0	0	1	0	1	0	0	1	2	1	1	0	0
4	16	2	7	2	3	0	2	0	10	0	0	0	1	1	0	3	2	2	0	0	2	1	0	1	1	0	0	1	0	1	0	0
13	34	15	4	0	6	2	4	3	4.99	1	3	3	2	3	3	1	2	1	0	0	0	1	2	3	0	1	1	0	2	2	2	1
7	32	12	5	0	5	1	7	2	20	2	1	0	3	3	3	2	3	0	0	0	0	1	1	2	1	0	1	3	3	1	0	2
14	20	7	5	0	3	0	4	1	10	1	0	0	2	2	2	3	2	0	0	0	0	1	1	1	0	0	0	1	1	2	1	0
11	24	12	1	0	6	1	4	0	20	2	2	2	2	2	2	1	0	0	0	0	0	2	1	1	2	0	1	2	1	1	0	0
16	35	17	5	2	5	0	4	2	120	3	3	3	3	2	3	2	2	1	1	0	1	2	0	2	1	0	0	1	2	1	2	0
16	24	15	2	0	2	0	2	3	10	1	2	3	3	3	3	1	1	0	0	0	0	2	0	0	0	0	0	0	1	1	1	2
8	15	7	3	0	2	0	3	0	80	0	0	0	2	3	2	0	3	0	0	0	0	0	0	1	1	0	0	1	1	1	0	0
14	23	11	5	0	3	1	3	0	20	2	1	1	3	1	3	2	2	1	0	0	0	1	0	1	1	1	0	1	1	1	0	0
3	7	3	2	0	0	0	2	0	0	0	0	1	0	2	0	0	2	0	0	0	0	0	0	0	0	0	0	1	1	0	0	0
12	15	9	2	0	3	0	1	0	40	2	0	0	2	2	3	1	1	0	0	0	0	2	0	1	0	0	0	1	0	0	0	0
14	41	17	9	0	1	0	8	6	30	3	2	3	3	3	3	3	3	3	0	0	0	0	0	1	0	0	0	3	3	2	3	3
16	33	13	4	3	4	2	5	2	10	3	1	0	3	3	3	2	0	2	2	0	1	2	0	1	1	0	2	2	2	1	1	1
3	26	10	3	0	3	0	8	2	10	0	2	3	1	2	2	0	3	0	0	0	0	2	0	1	0	0	0	2	3	3	2	0
9	25	7	2	3	5	1	5	2	3	1	0	1	1	2	2	1	1	0	1	1	1	2	1	1	1	1	0	2	1	2	1	1
12	26	9	6	1	4	0	3	3	5	1	0	0	2	3	3	2	2	2	1	0	0	1	0	2	1	0	0	0	1	2	2	1
13	30	11	6	2	4	1	6	0	10	2	1	0	2	3	3	2	3	1	1	0	1	1	0	2	1	0	1	2	2	2	0	0
8	19	9	0	1	2	3	2	2	100	1	1	1	2	2	2	0	0	0	1	0	0	1	0	0	1	1	2	1	1	0	1	1
16	38	16	4	0	3	3	9	3	20	2	3	2	3	3	3	1	3	0	0	0	0	0	0	1	2	1	2	3	3	3	1	2
14	40	16	8	1	8	1	5	1	20	3	3	1	3	3	3	3	3	2	0	0	1	2	2	2	2	1	0	1	2	2	0	1
15	44	13	8	4	10	2	5	2	20	2	2	2	2	2	3	3	2	3	1	1	2	2	2	3	3	1	1	2	1	2	1	1
11	18	9	2	0	4	0	3	0	5	1	1	1	2	2	2	0	2	0	0	0	0	1	1	1	1	0	0	1	1	1	0	0
13	28	14	7	1	3	0	1	2	4	2	2	1	3	3	3	3	3	1	0	0	1	1	0	1	1	0	0	0	1	0	1	1
7	7	3	3	0	1	0	0	0	20	0	0	0	1	1	1	1	1	1	0	0	0	1	0	0	0	0	0	0	0	0	0	0
14	18	7	1	0	1	0	9	0	0.99	0	1	3	0	3	0	1	0	0	0	0	0	1	0	0	0	0	0	3	3	3	0	0
16	22	7	0	0	4	2	9	0	9	3	0	0	2	2	0	0	0	0	0	0	0	3	0	0	1	1	1	3	3	3	0	0
6	22	8	4	0	3	0	5	2	5	3	0	0	2	1	2	1	3	0	0	0	0	2	0	1	0	0	0	2	1	2	2	0
8	26	10	1	1	2	6	2	4	6	3	2	3	1	1	0	0	1	0	0	0	1	0	0	1	1	3	3	1	0	1	2	2
12	24	12	4	0	2	1	4	1	30	3	1	1	3	2	2	1	2	1	0	0	0	1	0	0	1	0	1	1	2	1	1	0
14	28	8	5	3	4	1	4	3	5	1	1	2	1	1	2	2	2	1	0	1	2	2	0	1	1	0	1	1	1	2	2	1
11	34	14	8	1	7	1	3	0	50	2	2	2	3	3	2	2	3	3	0	1	0	2	2	2	1	1	0	0	2	1	0	0
14	17	5	4	0	2	1	3	2	10	0	0	0	1	2	2	1	2	1	0	0	0	1	0	1	0	0	1	1	1	1	1	1
14	38	13	8	1	7	1	7	1	30	3	1	1	3	2	3	3	3	2	0	0	1	2	2	2	1	1	0	2	2	3	1	0
18	47	15	7	2	8	3	7	5	20	3	2	1	3	3	3	3	2	2	1	0	1	2	1	3	2	1	2	2	3	2	3	2
7	16	4	4	0	0	0	6	2	20	1	0	0	1	1	1	2	2	0	0	0	0	0	0	0	0	0	0	2	2	2	2	0
10	22	7	7	0	4	1	3	0	2	1	0	1	2	2	1	2	3	2	0	0	0	1	1	1	1	1	0	1	1	1	0	0
9	28	10	7	0	2	2	5	2	5	0	1	0	3	3	3	3	3	1	0	0	0	1	0	0	1	0	2	2	3	0	2	0
8	11	4	2	0	2	0	2	1	0	0	0	1	1	1	1	1	1	0	0	0	0	1	0	1	0	0	0	1	0	1	1	0
14	27	9	5	0	3	2	5	3	15	2	2	2	1	1	1	1	2	2	0	0	0	1	1	1	0	1	1	1	2	2	2	1
0	0	0	0	0	0	0	0	0	0	0	0	0	0	0	0	0	0	0	0	0	0	0	0	0	0	0	0	0	0	0	0	0
11	20	10	4	2	2	0	2	0	10	1	2	1	2	2	2	2	1	1	0	1	1	0	1	1	0	0	0	1	1	0	0	0
13	28	7	6	3	4	0	5	3	5	0	0	1	2	2	2	1	3	2	2	0	1	2	0	2	0	0	0	3	0	2	3	0
12	36	10	2	1	5	5	7	6	53	3	0	1	3	0	3	1	1	0	1	0	0	2	1	2	0	3	2	2	2	3	3	3
11	20	7	4	0	2	0	5	2	20	1	1	2	1	1	1	2	2	0	0	0	0	1	0	1	0	0	0	2	2	1	2	0
9	24	10	5	0	4	0	3	2	5	2	1	0	3	2	2	1	3	1	0	0	0	1	0	1	2	0	0	0	1	2	2	0
15	24	7	7	0	5	0	3	2	10	1	0	0	1	2	3	2	3	2	0	0	0	1	1	2	1	0	0	0	1	2	1	1
7	11	5	2	0	1	0	3	0	10	1	0	0	1	2	1	2	0	0	0	0	0	1	0	0	0	0	0	1	1	1	0	0
13	27	13	2	0	1	4	4	3	60	2	1	3	3	1	3	0	2	0	0	0	0	1	0	0	0	2	2	0	2	2	1	2
14	22	11	1	0	6	0	4	0	100	1	1	2	2	3	2	0	1	0	0	0	0	1	1	2	2	0	0	1	1	2	0	0
11	22	10	0	0	4	2	6	0	8	1	0	2	2	3	2	0	0	0	0	0	0	1	1	1	1	1	1	2	2	2	0	0
11	24	11	5	0	3	0	5	0	25	1	1	2	2	2	3	1	3	1	0	0	0	1	0	1	1	0	0	1	2	2	0	0
14	25	11	1	1	7	0	4	1	0	1	2	0	2	3	3	0	1	0	0	0	1	1	1	3	2	0	0	2	0	2	1	0
13	34	14	3	1	5	1	5	5	30	3	1	2	2	3	3	0	2	1	0	0	1	1	1	2	1	1	0	2	1	2	2	3
17	43	15	4	6	12	0	3	3	400	0	3	3	3	3	3	1	3	0	3	3	0	3	3	3	3	0	0	3	0	0	3	0
5	23	10	0	0	3	2	4	4	0	3	0	0	3	1	3	0	0	0	0	0	0	2	0	0	1	1	1	2	0	2	2	2
17	45	14	6	2	9	2	8	4	10	1	2	2	3	3	3	2	3	1	1	0	1	2	2	3	2	1	1	2	3	3	2	2
14	30	12	2	1	8	1	4	2	10	3	0	0	3	3	3	1	1	0	1	0	0	2	3	3	0	1	0	1	1	2	2	0
9	26	13	7	0	0	0	6	0	5	3	1	1	2	3	3	2	3	2	0	0	0	0	0	0	0	0	0	1	3	2	0	0
13	39	10	8	0	8	3	5	5	15	1	0	3	1	3	2	3	3	2	0	0	0	2	2	3	1	2	1	2	2	1	3	2
12	26	8	0	1	5	3	5	4	5	2	1	1	2	1	1	0	0	0	0	0	1	2	0	1	2	1	2	0	3	2	1	3
6	23	9	7	0	1	1	5	0	1	0	0	0	3	3	3	3	3	1	0	0	0	0	0	1	0	0	1	2	3	0	0	0
12	25	7	7	0	9	0	2	0	150	1	1	1	2	1	1	3	2	2	0	0	0	2	2	2	3	0	0	0	1	1	0	0
14	19	11	6	1	0	0	1	0	4	0	1	2	2	3	3	2	3	1	0	0	1	0	0	0	0	0	0	0	1	0	0	0
11	26	10	6	0	4	0	5	1	20	2	1	1	2	2	2	2	2	2	0	0	0	1	1	1	1	0	0	2	1	2	1	0
17	44	14	6	3	8	4	7	2	20	1	2	2	3	3	3	2	3	1	1	0	2	2	3	2	1	1	3	2	3	2	2	0
12	21	9	3	0	1	0	4	4	30	2	1	1	1	3	1	0	3	0	0	0	0	0	0	1	0	0	0	1	1	2	2	2
0	12	6	3	0	0	0	3	0	0	0	0	0	0	3	3	0	3	0	0	0	0	0	0	0	0	0	0	0	3	0	0	0
7	12	6	2	0	0	2	2	0	0	1	1	1	1	1	1	1	1	0	0	0	0	0	0	0	0	1	1	1	1	0	0	0
3	14	3	5	1	1	1	2	1	8	0	1	0	0	2	0	1	3	1	0	1	0	1	0	0	0	0	1	1	1	0	1	0
3	17	4	5	0	2	2	4	0	2	0	0	0	2	1	1	2	2	1	0	0	0	1	0	1	0	1	1	2	1	1	0	0
19	41	16	5	0	6	4	6	4	20	3	2	3	2	3	3	1	3	1	0	0	0	1	1	2	2	2	2	1	2	3	2	2
7	24	10	1	2	1	3	5	2	80	2	1	3	2	1	1	0	1	0	0	1	1	0	0	0	1	1	2	1	2	2	1	1
9	30	13	5	1	3	1	6	1	5	2	1	2	3	3	2	2	2	1	0	0	1	1	0	1	1	0	1	2	2	2	1	0
16	33	12	6	5	4	0	2	4	3	2	2	0	3	3	2	3	2	1	2	1	2	2	0	1	1	0	0	1	0	1	2	2
10	27	13	5	1	4	3	1	0	12	1	2	3	3	3	1	2	2	1	0	0	1	2	1	1	0	2	1	0	0	1	0	0
20	56	18	9	0	11	6	9	3	20	3	3	3	3	3	3	3	3	3	0	0	0	2	3	3	3	3	3	3	3	3	3	0
9	27	10	5	0	3	2	3	4	15	2	2	1	2	2	1	2	2	1	0	0	0	1	0	1	1	1	1	1	1	1	2	2
10	22	12	2	0	3	2	2	1	5	1	3	1	3	2	2	1	1	0	0	0	0	2	0	0	1	2	0	0	1	1	0	1
6	11	9	0	0	1	0	0	1	5	2	1	0	2	2	2	0	0	0	0	0	0	1	0	0	0	0	0	0	0	0	0	1
7	11	6	0	0	1	2	2	0	5	1	1	1	1	1	1	0	0	0	0	0	0	1	0	0	0	1	1	1	0	1	0	0
12	33	16	3	0	3	1	8	2	8	3	2	3	3	3	2	1	2	0	0	0	0	1	1	1	0	0	1	2	3	3	2	0
12	32	14	8	0	7	0	3	0	10	1	2	2	3	3	3	3	3	2	0	0	0	2	1	2	2	0	0	1	1	1	0	0
16	33	14	7	2	7	0	3	0	15	2	2	3	1	3	3	1	3	3	0	0	2	1	2	3	1	0	0	0	0	3	0	0
7	25	7	6	0	6	1	4	1	10	1	0	0	2	2	2	2	2	2	0	0	0	2	2	2	0	0	1	2	0	2	1	0
2	27	12	7	0	0	0	6	2	1	2	0	2	2	3	3	3	3	1	0	0	0	0	0	0	0	0	0	2	2	2	2	0
9	24	10	1	2	4	3	3	1	5	2	1	2	1	2	2	0	0	1	0	1	1	1	1	1	1	1	2	1	1	1	1	0
15	27	11	4	2	4	2	4	0	20	2	1	2	2	2	2	2	1	1	1	0	1	1	1	1	1	1	1	1	2	1	0	0
0	13	8	1	1	1	0	2	0	0	1	0	1	2	2	2	0	1	0	1	0	0	1	0	0	0	0	0	1	0	1	0	0
7	15	10	2	0	1	0	1	1	4	1	0	2	2	2	3	1	1	0	0	0	0	1	0	0	0	0	0	0	1	0	1	0
11	23	7	5	0	3	1	5	2	15	1	0	2	1	2	1	2	3	0	0	0	0	1	0	1	1	0	1	2	2	1	2	0
15	38	8	2	1	10	6	7	4	20	2	0	1	2	1	2	1	1	0	0	0	1	2	3	3	2	3	3	3	2	2	2	2
16	21	8	0	1	7	0	2	3	20	1	1	2	0	2	2	0	0	0	1	0	0	3	2	2	0	0	0	1	1	0	2	1
16	26	10	1	3	4	0	4	4	80	3	1	0	2	3	1	0	0	1	2	0	1	0	1	2	1	0	0	1	2	1	2	2
9	16	2	5	0	1	3	5	0	5	1	0	0	1	0	0	2	2	1	0	0	0	1	0	0	0	1	2	2	2	1	0	0
0	3	2	0	0	1	0	0	0	0	1	1	0	0	0	0	0	0	0	0	0	0	1	0	0	0	0	0	0	0	0	0	0
10	34	13	4	0	0	4	7	6	30	2	0	2	3	3	3	0	3	1	0	0	0	0	0	0	0	2	2	2	3	2	3	3
9	35	14	0	2	4	4	8	3	15	2	2	1	3	3	3	0	0	0	1	0	1	1	0	1	2	2	2	3	3	2	1	2
9	19	9	3	0	2	1	3	1	0	1	1	1	2	2	2	1	1	1	0	0	0	2	0	0	0	0	1	1	1	1	1	0
5	15	5	2	1	2	1	4	0	1	0	0	0	1	2	2	0	2	0	0	0	1	0	0	1	1	0	1	2	1	1	0	0
11	24	9	5	1	5	0	3	1	15	2	1	1	2	1	2	2	2	1	0	0	1	2	1	1	1	0	0	1	1	1	1	0
11	29	14	0	0	5	3	5	2	5	3	1	2	2	3	3	0	0	0	0	0	0	2	0	1	2	1	2	2	1	2	0	2
9	32	12	7	0	6	0	3	4	20	1	1	1	3	3	3	3	2	2	0	0	0	1	2	2	1	0	0	1	1	1	2	2
14	44	15	5	3	7	2	7	5	40	2	2	3	3	2	3	2	2	1	2	0	1	2	1	2	2	1	1	2	3	2	2	3
12	12	5	4	1	0	0	2	0	50	2	0	0	1	1	1	2	2	0	1	0	0	0	0	0	0	0	0	1	1	0	0	0
7	21	8	5	0	1	1	4	2	15	2	0	1	2	1	2	2	2	1	0	0	0	0	0	0	1	0	1	1	2	1	1	1
11	27	8	6	0	5	3	3	2	0	0	0	2	3	3	0	3	1	2	0	0	0	3	0	0	2	0	3	2	1	0	2	0
5	16	9	1	1	1	0	4	0	20	2	0	0	2	3	2	0	1	0	0	0	1	0	0	1	0	0	0	1	2	1	0	0
8	36	16	2	0	3	3	9	3	30	3	3	3	3	2	2	0	2	0	0	0	0	1	0	0	2	1	2	3	3	3	2	1
11	24	12	6	0	0	0	4	2	23	2	1	2	2	3	2	3	2	1	0	0	0	0	0	0	0	0	0	2	0	2	2	0
14	29	14	2	2	4	0	4	3	10	3	2	1	3	3	2	0	1	1	2	0	0	2	0	1	1	0	0	1	2	1	1	2
0	3	1	1	0	0	0	1	0	5	0	0	0	0	0	1	0	1	0	0	0	0	0	0	0	0	0	0	1	0	0	0	0
8	15	6	6	0	1	0	2	0	2	1	0	1	1	2	1	2	2	2	0	0	0	1	0	0	0	0	0	0	1	1	0	0
15	39	15	6	0	5	3	6	4	50	2	3	2	2	3	3	2	3	1	0	0	0	1	0	1	3	2	1	2	2	2	1	3
15	33	11	8	1	3	1	5	4	20	2	1	0	3	3	2	3	3	2	0	0	1	0	0	1	2	0	1	2	2	1	2	2
9	39	13	7	1	3	4	5	6	20	2	2	2	2	3	2	3	3	1	0	1	0	1	0	1	1	2	2	2	1	2	3	3
14	21	12	1	3	1	0	3	1	5	2	1	2	2	3	2	0	1	0	1	0	2	0	0	1	0	0	0	1	1	1	0	1
7	17	9	0	0	2	1	2	3	10	2	1	1	2	1	2	0	0	0	0	0	0	1	0	1	0	0	1	1	1	0	2	1
11	12	4	6	0	0	0	2	0	10	0	0	0	2	1	1	2	2	2	0	0	0	0	0	0	0	0	0	1	0	1	0	0
14	22	9	8	0	3	0	2	0	25	1	0	0	2	3	3	3	3	2	0	0	0	1	0	1	1	0	0	1	1	0	0	0
14	39	12	6	5	5	0	6	5	50	2	2	2	2	2	2	2	2	2	1	2	2	2	1	1	1	0	0	2	2	2	2	3
11	30	15	4	1	3	2	5	0	15	2	2	2	3	3	3	1	3	0	1	0	0	2	0	1	0	1	1	1	1	3	0	0
13	33	11	4	1	4	6	5	2	20	2	2	1	1	2	3	1	2	1	0	0	1	1	0	1	2	3	3	2	1	2	1	1
10	5	1	3	0	0	0	1	0	5	0	0	0	1	0	0	1	1	1	0	0	0	0	0	0	0	0	0	1	0	0	0	0
11	15	4	4	0	1	1	3	2	2	1	0	0	1	1	1	2	2	0	0	0	0	0	0	1	0	1	0	1	1	1	1	1
6	12	3	4	1	1	0	2	1	5	0	0	0	0	1	2	1	2	1	1	0	0	1	0	0	0	0	0	1	0	1	1	0
20	41	15	4	3	7	2	6	4	10	2	2	2	3	3	3	1	2	1	1	0	2	2	2	2	1	1	1	2	2	2	2	2
14	22	11	4	0	1	0	4	2	25	2	2	1	0	3	3	1	2	1	0	0	0	1	0	0	0	0	0	1	2	1	0	2
14	22	12	0	0	7	0	1	2	10	1	1	2	2	3	3	0	0	0	0	0	0	2	1	2	2	0	0	0	1	0	1	1
15	25	13	6	0	2	2	2	0	2	2	1	3	2	3	2	3	2	1	0	0	0	1	0	1	0	1	1	1	0	1	0	0
15	23	11	1	0	4	0	7	0	30	1	2	3	1	3	1	0	1	0	0	0	0	1	1	2	0	0	0	2	2	3	0	0
9	21	9	3	0	1	3	5	0	10	2	1	1	2	1	2	1	2	0	0	0	0	0	0	0	1	1	2	2	1	2	0	0
16	36	16	5	0	6	0	8	1	30	3	3	3	2	2	3	1	3	1	0	0	0	2	0	3	1	0	0	2	3	3	1	0
11	20	4	7	0	2	0	6	1	10	1	0	0	1	1	1	3	3	1	0	0	0	1	1	0	0	0	0	3	1	2	1	0
9	25	14	3	1	2	0	3	2	10	2	2	2	2	3	3	1	1	1	1	0	0	1	0	1	0	0	0	1	1	1	1	1
17	25	11	2	1	5	1	3	2	20	3	0	0	2	3	3	1	1	0	1	0	0	1	1	3	0	1	0	1	1	1	2	0
9	4	1	1	0	0	1	1	0	0	1	0	0	0	0	0	0	1	0	0	0	0	0	0	0	0	0	1	0	0	1	0	0
9	25	9	8	0	3	0	3	2	5	0	0	2	2	2	3	3	3	2	0	0	0	1	0	1	1	0	0	0	2	1	2	0
15	25	9	6	2	5	1	2	0	10	1	1	1	2	3	1	2	3	1	0	0	2	2	1	1	1	0	1	1	0	1	0	0
10	24	7	7	0	2	1	6	1	5	0	0	1	2	2	2	3	3	1	0	0	0	1	0	0	1	0	1	2	2	2	1	0
11	27	8	6	0	5	1	5	2	30	1	1	0	2	2	2	2	2	2	0	0	0	1	0	2	2	1	0	2	1	2	1	1
7	17	3	8	0	1	0	5	0	20	0	0	1	0	1	1	3	3	2	0	0	0	1	0	0	0	0	0	2	1	2	0	0
13	41	15	6	0	9	1	6	4	15	2	3	3	2	3	2	2	2	2	0	0	0	3	1	2	3	1	0	2	2	2	2	2
8	10	4	1	1	1	1	2	0	30	1	0	0	1	1	1	0	1	0	1	0	0	1	0	0	0	0	1	1	0	1	0	0
12	25	14	2	0	2	2	5	0	8	2	2	3	2	2	3	1	1	0	0	0	0	1	0	1	0	0	2	2	2	1	0	0
8	14	5	3	0	1	1	4	0	5	0	0	1	1	2	1	0	2	1	0	0	0	0	0	1	0	0	1	1	2	1	0	0
4	2	0	1	0	0	0	1	0	1	0	0	0	0	0	0	0	1	0	0	0	0	0	0	0	0	0	0	0	1	0	0	0
2	16	9	0	1	1	1	3	1	1	2	1	1	2	1	2	0	0	0	1	0	0	1	0	0	0	0	1	2	0	1	0	1
16	35	8	8	0	9	2	5	3	5	2	1	0	1	2	2	3	3	2	0	0	0	2	3	3	1	1	1	2	1	2	2	1
19	51	17	7	4	8	5	7	3	5	3	2	3	3	3	3	3	3	1	1	1	2	3	1	2	2	2	3	3	2	2	1	2
4	26	12	0	1	2	5	6	0	5	2	1	2	1	3	3	0	0	0	1	0	0	2	0	0	0	2	3	3	1	2	0	0
12	28	11	5	1	1	3	7	0	5	2	0	3	2	2	2	3	2	0	0	0	1	0	0	0	1	2	1	2	3	2	0	0
11	40	14	4	4	5	4	6	3	10	2	2	3	2	3	2	1	2	1	1	1	2	2	0	2	1	1	3	2	2	2	1	2
15	34	11	6	2	7	2	5	1	5	2	1	1	2	2	3	2	3	1	1	0	1	2	1	2	2	1	1	1	2	2	1	0
13	24	8	4	1	8	0	3	0	10	1	1	0	2	2	2	1	2	1	0	0	1	2	2	2	2	0	0	1	1	1	0	0
12	20	6	4	2	2	1	3	2	10	1	1	1	1	1	1	2	2	0	1	0	1	0	0	1	1	1	0	1	1	1	1	1
13	30	8	6	2	8	0	6	0	10	1	1	1	1	2	2	2	2	2	0	0	2	2	2	2	2	0	0	2	2	2	0	0
11	22	9	3	0	1	0	5	4	14	2	1	1	1	2	2	0	2	1	0	0	0	0	0	1	0	0	0	1	2	2	2	2
14	36	14	3	3	3	3	6	4	0	2	2	2	2	3	3	1	1	1	1	1	1	1	0	1	1	1	2	1	3	2	2	2
9	21	6	1	1	4	1	8	0	10	3	0	0	0	2	1	1	0	0	0	0	1	1	1	1	1	0	1	3	2	3	0	0
14	29	12	7	3	4	0	1	2	0	2	3	1	1	3	2	3	3	1	2	0	1	2	0	1	1	0	0	0	1	0	2	0
17	39	11	8	0	8	1	7	4	50	0	0	2	3	3	3	3	3	2	0	0	0	3	2	2	1	0	1	2	3	2	2	2
7	27	15	3	1	0	2	3	3	5	3	3	2	2	2	3	1	1	1	1	0	0	0	0	0	0	1	1	1	1	1	1	2
13	33	16	1	1	6	3	3	3	500	2	3	2	3	3	3	0	1	0	0	0	1	2	1	1	2	1	2	2	1	0	1	2
6	29	10	6	0	2	3	4	4	5	1	0	2	1	3	3	2	3	1	0	0	0	1	0	1	0	2	1	0	2	2	2	2
12	19	8	0	1	3	4	2	1	5	3	0	1	1	2	1	0	0	0	0	0	1	1	1	1	0	2	2	2	0	0	0	1
9	29	13	5	0	2	1	3	5	30	1	1	2	3	3	3	2	3	0	0	0	0	1	0	1	0	0	1	2	0	1	3	2
9	19	7	4	0	3	1	2	2	30	1	0	1	1	2	2	1	2	1	0	0	0	1	0	1	1	0	1	0	1	1	2	0
5	16	2	6	0	5	0	2	1	0	0	0	0	1	1	0	3	2	1	0	0	0	3	1	1	0	0	0	1	1	0	1	0
12	31	14	5	0	4	2	5	1	10	2	2	3	2	2	3	2	3	0	0	0	0	2	1	1	0	1	1	1	2	2	1	0
8	24	7	5	0	8	0	3	1	10	1	0	1	2	1	2	3	1	1	0	0	0	2	2	2	2	0	0	1	1	1	1	0
11	25	14	0	0	3	1	7	0	5	3	1	2	3	2	3	0	0	0	0	0	0	2	0	1	0	0	1	2	3	2	0	0
10	24	9	3	1	3	2	5	1	25	2	1	0	3	1	2	1	2	0	1	0	0	1	0	2	0	0	2	2	1	2	1	0
9	18	9	0	1	1	2	5	0	10	1	0	1	2	3	2	0	0	0	0	0	1	1	0	0	0	1	1	2	1	2	0	0
11	28	13	3	2	6	0	4	0	10	0	1	3	3	3	3	1	1	1	1	0	1	2	0	3	1	0	0	1	3	0	0	0
18	40	16	5	0	8	2	6	3	1	3	2	2	3	3	3	2	1	2	0	0	0	2	2	3	1	1	1	2	2	2	0	3
14	33	16	6	2	2	1	4	2	30	2	2	3	3	3	3	2	3	1	0	1	1	0	0	2	0	0	1	1	1	2	1	1
10	38	15	7	0	3	3	6	4	3	3	2	2	3	2	3	3	3	1	0	0	0	1	0	0	2	1	2	3	2	1	2	2
10	25	8	4	0	4	1	4	4	20	1	1	2	1	1	2	1	2	1	0	0	0	1	0	1	2	0	1	1	2	1	2	2
18	43	13	7	3	7	3	6	4	30	2	2	2	1	3	3	3	3	1	1	0	2	2	1	2	2	1	2	2	2	2	2	2
13	28	7	6	3	3	0	6	3	0	0	0	2	1	3	1	3	3	0	1	0	2	1	1	1	0	0	0	2	1	3	3	0
11	24	11	3	2	2	1	3	2	3	2	2	1	2	2	2	1	1	1	1	0	1	1	0	0	1	0	1	1	1	1	1	1
14	28	11	5	1	8	0	3	0	10	1	1	2	1	3	3	0	3	2	0	0	1	1	2	3	2	0	0	1	0	2	0	0
9	22	12	1	2	2	1	4	0	5	2	2	3	1	2	2	0	1	0	1	0	1	1	0	1	0	0	1	2	1	1	0	0
15	40	14	4	3	7	2	6	4	20	2	2	2	2	3	3	1	2	1	1	1	1	1	2	2	2	1	1	2	2	2	2	2
15	30	10	6	2	3	1	6	2	5	1	1	1	3	2	2	3	2	1	0	0	2	0	1	1	1	0	1	2	2	2	2	0
14	44	14	8	3	9	0	6	4	50	3	1	3	2	3	2	3	3	2	2	0	1	1	2	3	3	0	0	0	3	3	3	1
10	22	8	5	1	4	0	4	0	10	1	1	1	2	2	1	2	3	0	0	0	1	1	1	1	1	0	0	1	2	1	0	0
12	33	12	5	1	6	1	4	4	15	2	2	2	1	2	3	2	2	1	0	1	0	1	1	2	2	1	0	1	2	1	2	2
5	15	9	0	0	0	1	5	0	5	3	0	1	3	1	1	0	0	0	0	0	0	0	0	0	0	0	1	1	2	2	0	0
9	33	6	8	0	6	2	5	6	30	1	0	1	1	2	1	3	3	2	0	0	0	1	1	2	2	1	1	1	1	3	3	3
13	34	14	7	0	3	3	7	0	100	2	1	2	3	3	3	2	3	2	0	0	0	1	0	1	1	1	2	2	3	2	0	0
5	11	6	1	0	1	0	2	1	20	1	1	1	1	1	1	0	1	0	0	0	0	1	0	0	0	0	0	1	0	1	0	1
12	40	14	9	4	5	0	6	2	10	1	2	2	3	3	3	3	3	3	1	1	2	2	1	1	1	0	0	2	2	2	2	0
15	44	13	6	3	8	4	6	4	5	1	2	2	2	3	3	3	2	1	1	0	2	2	2	2	2	2	2	1	3	2	1	3
10	27	6	8	0	4	1	7	1	30	1	0	0	1	3	1	3	3	2	0	0	0	1	1	2	0	0	1	2	3	2	1	0
11	33	11	8	0	3	2	6	3	5	1	1	1	2	3	3	3	3	2	0	0	0	1	1	1	0	1	1	2	2	2	2	1
11	25	8	7	1	6	0	3	0	5	1	0	1	2	2	2	3	3	1	0	0	1	2	2	1	1	0	0	1	1	1	0	0
12	23	6	6	0	2	1	6	2	5	1	1	1	1	1	1	2	2	2	0	0	0	1	0	0	1	0	1	2	2	2	1	1
14	24	10	3	0	4	2	5	0	30	2	0	1	2	3	2	1	1	1	0	0	0	1	0	1	2	1	1	2	1	2	0	0
11	23	4	5	3	6	0	4	1	0	1	0	0	0	1	2	1	3	1	2	0	1	2	2	1	1	0	0	1	1	2	1	0
14	27	9	7	0	4	0	4	3	30	1	1	1	2	2	2	2	3	2	0	0	0	1	1	1	1	0	0	1	1	2	2	1
10	10	6	2	0	2	0	0	0	50	1	1	1	1	1	1	1	1	0	0	0	0	2	0	0	0	0	0	0	0	0	0	0
12	24	7	7	0	2	1	7	0	5	0	0	0	2	2	3	3	3	1	0	0	0	1	0	1	0	1	0	3	2	2	0	0
15	30	10	1	2	3	5	8	1	300	2	0	1	2	2	3	0	1	0	0	0	2	1	1	1	0	3	2	3	2	3	1	0
3	19	8	4	1	2	0	3	1	3	1	0	1	2	2	2	2	2	0	1	0	0	1	0	0	1	0	0	1	1	1	1	0
4	18	6	3	1	2	2	4	0	0	0	0	0	3	1	2	1	1	1	1	0	0	1	0	1	0	1	1	1	1	2	0	0
14	48	12	6	6	8	4	8	4	20	2	2	2	2	2	2	2	2	2	2	2	2	2	2	2	2	2	2	2	3	3	2	2
11	31	16	5	2	2	0	3	3	3	3	3	2	2	3	3	2	2	1	1	0	1	0	0	2	0	0	0	1	1	1	1	2
12	35	15	3	2	5	1	6	3	100	3	1	2	3	3	3	1	2	0	1	0	1	1	1	2	1	0	1	2	2	2	2	1
11	15	5	4	0	2	0	3	1	5	0	0	0	2	1	2	2	2	0	0	0	0	1	0	1	0	0	0	1	1	1	1	0
10	26	9	6	0	4	1	4	2	10	1	2	2	1	2	1	2	3	1	0	0	0	1	1	1	1	0	1	1	1	2	2	0
14	20	5	7	0	5	1	2	0	20	1	0	0	1	2	1	2	2	3	0	0	0	1	2	1	1	1	0	0	1	1	0	0
19	40	14	3	5	6	3	6	3	10	2	2	3	2	3	2	1	1	1	2	1	2	2	1	1	2	1	2	2	2	2	3	0
11	23	9	3	0	2	4	3	2	25	2	1	2	1	2	1	0	3	0	0	0	0	0	0	1	1	2	2	0	0	3	1	1
12	25	8	7	0	3	1	4	2	10	1	2	2	1	0	2	3	1	3	0	0	0	1	1	1	0	1	0	1	2	1	2	0
15	23	6	4	0	7	0	6	0	10	0	0	0	2	2	2	2	2	0	0	0	0	2	2	2	1	0	0	2	2	2	0	0
9	19	7	4	0	2	1	4	1	5	1	0	0	2	2	2	2	1	1	0	0	0	1	0	0	1	0	1	1	2	1	1	0
10	23	9	5	0	5	0	4	0	5	1	1	1	2	2	2	2	2	1	0	0	0	2	1	1	1	0	0	0	2	2	0	0
13	30	8	4	4	6	2	5	1	50	0	1	2	1	2	2	1	2	1	0	2	2	1	2	1	2	1	1	2	2	1	1	0
15	35	16	4	2	5	0	6	2	30	3	2	2	3	3	3	1	2	1	2	0	0	1	1	1	2	0	0	2	2	2	2	0
14	25	8	8	0	1	0	6	2	30	1	1	1	3	2	0	3	3	2	0	0	0	1	0	0	0	0	0	2	2	2	2	0
12	29	12	0	0	4	3	7	3	100	2	1	2	2	2	3	0	0	0	0	0	0	0	1	1	2	1	2	3	2	2	1	2
13	26	12	4	0	3	1	3	3	6	1	1	2	2	3	3	0	2	2	0	0	0	1	0	1	1	1	0	1	1	1	2	1
2	19	7	6	0	1	2	3	0	0	1	1	0	2	1	2	2	3	1	0	0	0	0	0	1	0	1	1	2	0	1	0	0
11	24	12	0	1	3	3	5	0	2	3	1	2	2	2	2	0	0	0	0	0	1	1	0	1	1	1	2	1	2	2	0	0
16	16	8	0	2	0	3	3	0	5	2	1	0	2	2	1	0	0	0	1	0	1	0	0	0	0	0	3	1	0	2	0	0
12	33	14	8	1	7	1	2	0	10	2	1	2	3	3	3	3	3	2	0	0	1	2	0	2	3	1	0	0	0	2	0	0
12	41	15	5	0	4	4	8	5	10	2	3	3	1	3	3	2	2	1	0	0	0	1	1	1	1	2	2	3	3	2	3	2
10	23	9	3	1	1	2	5	2	50	2	1	1	1	2	2	1	1	1	0	0	1	0	0	0	1	1	1	1	2	2	1	1
14	31	10	7	3	5	0	5	1	20	0	0	2	3	3	2	2	3	2	1	0	2	1	1	3	0	0	0	1	2	2	1	0
10	16	9	1	0	4	0	1	1	20	1	0	0	2	3	3	0	1	0	0	0	0	1	1	1	1	0	0	0	0	1	1	0
7	12	6	0	0	0	3	3	0	0	1	1	0	1	2	1	0	0	0	0	0	0	0	0	0	0	1	2	1	1	1	0	0
13	26	9	4	0	4	3	4	2	0	1	1	2	1	2	2	2	1	1	0	0	0	1	1	1	1	2	1	1	1	2	1	1
11	22	7	6	0	4	0	5	0	10	1	0	0	2	2	2	3	2	1	0	0	0	1	1	1	1	0	0	2	1	2	0	0
18	41	15	7	3	5	1	7	3	10	3	2	1	3	3	3	2	3	2	0	1	2	1	1	1	2	1	0	2	2	3	2	1
13	28	11	1	1	8	2	3	2	80	3	2	2	1	1	2	0	0	1	0	0	1	2	2	3	1	1	1	0	1	2	0	2
11	15	9	0	1	1	0	2	2	10	1	0	1	1	3	3	0	0	0	1	0	0	1	0	0	0	0	0	1	1	0	0	2
7	21	10	3	2	1	0	3	2	3	0	1	1	3	2	3	0	3	0	2	0	0	1	0	0	0	0	0	1	1	1	2	0
7	19	7	3	0	1	2	5	1	25	1	1	2	1	0	2	1	1	1	0	0	0	1	0	0	0	1	1	1	2	2	0	1
9	24	12	2	1	4	2	3	0	55	2	1	1	3	2	3	0	2	0	0	0	1	2	0	2	0	0	2	0	2	1	0	0
14	30	10	8	3	3	0	4	2	8	2	1	1	2	2	2	3	3	2	1	1	1	1	0	1	1	0	0	1	1	2	2	0
18	30	9	4	2	5	2	5	3	10	1	1	2	1	3	1	1	2	1	1	0	1	2	1	1	1	1	1	2	1	2	2	1
12	18	10	3	0	3	0	2	0	1	2	1	1	2	2	2	1	2	0	0	0	0	1	0	1	1	0	0	1	1	0	0	0
19	50	17	6	4	10	6	7	0	10	3	3	2	3	3	3	2	3	1	1	1	2	2	3	3	2	3	3	3	1	3	0	0
14	36	14	7	5	3	0	5	2	4	3	2	2	2	3	2	2	3	2	2	1	2	1	1	1	0	0	0	2	1	2	1	1
14	38	11	6	1	2	6	6	6	2	3	1	1	2	2	2	2	3	1	0	0	1	1	0	1	0	3	3	2	2	2	3	3
16	37	11	4	6	8	2	6	0	20	2	2	1	2	2	2	1	2	1	2	2	2	2	2	2	2	1	1	2	2	2	0	0
16	34	11	5	1	7	1	6	3	5	1	2	0	2	3	3	2	2	1	0	0	1	1	2	2	2	0	1	2	2	2	2	1
15	34	10	8	0	4	3	5	4	5	1	0	0	3	3	3	3	3	2	0	0	0	1	0	1	2	2	1	2	2	1	2	2
17	29	14	5	0	7	0	2	1	30	1	2	2	3	3	3	2	2	1	0	0	0	2	1	2	2	0	0	0	0	2	1	0
11	36	16	5	0	5	3	6	1	5	2	2	3	3	3	3	2	2	1	0	0	0	2	1	1	1	1	2	2	2	2	0	1
11	28	9	2	2	4	4	5	2	1	1	1	2	2	2	1	1	1	0	1	0	1	1	0	1	2	2	2	1	2	2	1	1
9	36	12	4	3	9	0	8	0	10	1	2	2	3	3	1	1	3	0	0	1	2	2	2	2	3	0	0	3	3	2	0	0
11	23	8	7	0	3	0	4	1	5	1	1	0	2	2	2	3	2	2	0	0	0	1	1	1	0	0	0	1	2	1	1	0
3	25	10	7	0	3	0	5	0	5	1	1	3	0	3	2	3	3	1	0	0	0	2	0	0	1	0	0	2	2	1	0	0
12	36	10	4	2	6	3	9	2	10	2	1	1	2	3	1	2	2	0	1	0	1	2	0	2	2	1	2	3	3	3	1	1
13	27	13	0	1	5	1	6	1	40	3	1	2	3	2	2	0	0	0	1	0	0	2	1	1	1	0	1	2	2	2	1	0
1	20	4	7	0	3	2	4	0	5	0	0	0	2	1	1	3	1	3	0	0	0	1	1	1	0	1	1	1	2	1	0	0
12	24	6	5	1	3	3	3	3	5	1	0	1	1	1	2	2	2	1	1	0	0	2	0	0	1	1	2	1	0	2	1	2
0	2	0	1	0	0	1	0	0	0	0	0	0	0	0	0	0	0	1	0	0	0	0	0	0	0	1	0	0	0	0	0	0
11	40	10	6	3	7	5	6	3	5	2	1	1	2	2	2	1	3	2	1	1	1	2	2	2	1	2	3	2	2	2	2	1
17	33	13	6	1	5	0	5	3	0	2	1	1	3	3	3	2	3	1	1	0	0	1	1	1	2	0	0	2	1	2	3	0
17	29	12	0	2	4	2	5	4	10	2	1	2	3	2	2	0	0	0	1	0	1	2	1	1	0	1	1	1	2	2	2	2
7	17	5	3	0	2	3	4	0	5	1	1	1	1	1	0	1	1	1	0	0	0	1	0	0	1	1	2	2	1	1	0	0
14	31	14	4	1	6	1	4	1	10	1	2	2	3	3	3	1	2	1	1	0	0	3	1	1	1	1	0	0	2	2	1	0
10	26	11	5	0	2	1	5	2	10	2	1	1	2	2	3	2	2	1	0	0	0	0	0	1	1	1	0	1	2	2	2	0
19	24	8	4	0	5	1	6	0	150	2	0	1	1	2	2	1	2	1	0	0	0	1	1	1	2	0	1	2	2	2	0	0
17	13	0	9	1	1	0	1	1	10	0	0	0	0	0	0	3	3	3	0	0	1	0	0	1	0	0	0	0	1	0	1	0
18	31	9	8	1	5	0	6	2	3	1	0	0	2	3	3	3	3	2	0	0	1	2	0	3	0	0	0	2	3	1	2	0
10	21	6	1	3	0	2	8	1	15	2	1	0	0	2	1	0	1	0	1	0	2	0	0	0	0	1	1	3	2	3	0	1
1	7	4	0	0	0	1	2	0	10	1	0	0	1	1	1	0	0	0	0	0	0	0	0	0	0	0	1	1	0	1	0	0
18	34	13	0	3	6	4	8	0	30	3	1	1	2	3	3	0	0	0	1	0	2	1	1	2	2	3	1	3	2	3	0	0
6	12	3	4	0	1	0	3	1	5	0	0	0	3	0	0	1	3	0	0	0	0	0	0	0	1	0	0	1	1	1	1	0
16	35	8	5	6	6	2	6	2	100	0	1	1	2	3	1	1	3	1	2	2	2	1	1	2	2	0	2	2	2	2	2	0
7	19	6	6	0	0	1	5	1	10	0	0	0	2	3	1	2	3	1	0	0	0	0	0	0	0	0	1	2	2	1	1	0
6	30	11	7	1	2	1	4	4	10	0	2	1	3	3	2	2	3	2	1	0	0	1	0	0	1	1	0	2	1	1	2	2
13	37	14	9	0	9	0	3	2	10	2	2	2	2	3	3	3	3	3	0	0	0	2	3	3	1	0	0	0	2	1	1	1
16	28	11	3	0	9	1	4	0	5	1	1	1	3	3	2	2	1	0	0	0	0	2	2	3	2	1	0	0	2	2	0	0
5	18	10	4	0	1	1	2	0	5	2	1	0	3	2	2	2	1	1	0	0	0	1	0	0	0	0	1	1	1	0	0	0
7	17	9	3	0	0	2	3	0	50	1	1	1	2	2	2	1	1	1	0	0	0	0	0	0	0	1	1	1	1	1	0	0
8	11	4	1	0	3	0	3	0	5	1	0	0	1	1	1	0	1	0	0	0	0	1	0	1	1	0	0	1	1	1	0	0
7	41	15	7	0	2	4	7	6	10	2	2	2	3	3	3	3	3	1	0	0	0	0	0	1	1	2	2	2	2	3	3	3
8	27	12	5	0	5	1	3	1	5	1	2	2	2	3	2	2	2	1	0	0	0	2	1	1	1	0	1	1	0	2	0	1
9	10	9	0	0	0	0	1	0	2	1	0	0	3	2	3	0	0	0	0	0	0	0	0	0	0	0	0	1	0	0	0	0
9	20	3	7	0	4	1	2	3	10	0	0	0	1	1	1	3	3	1	0	0	0	1	0	1	2	1	0	1	0	1	2	1
7	23	11	7	0	2	1	2	0	50	1	2	2	2	2	2	3	2	2	0	0	0	2	0	0	0	0	1	1	0	1	0	0
10	12	3	4	1	1	0	3	0	3	0	0	0	1	1	1	2	2	0	0	0	1	0	0	0	1	0	0	2	1	0	0	0
14	40	14	5	5	7	2	6	1	4	2	2	3	2	3	2	1	2	2	3	1	1	2	2	2	1	0	2	2	2	2	1	0
13	27	5	8	0	3	2	6	3	20	2	0	1	0	1	1	3	3	2	0	0	0	1	1	1	0	1	1	2	2	2	3	0
8	24	12	0	2	6	1	3	0	2.99	3	1	2	3	1	2	0	0	0	1	0	1	2	1	2	1	0	1	1	1	1	0	0
14	24	9	4	1	4	1	5	0	3	1	1	2	1	2	2	2	2	0	1	0	0	1	0	1	2	1	0	1	2	2	0	0
12	23	9	2	1	7	1	0	3	15	2	0	0	2	3	2	1	1	0	1	0	0	2	2	3	0	0	1	0	0	0	2	1
8	34	10	7	0	8	2	5	2	12	1	2	1	2	2	2	3	2	2	0	0	0	2	1	2	3	1	1	3	1	1	2	0
14	25	12	4	1	2	1	5	0	25	2	1	2	2	3	2	2	2	0	0	0	1	0	0	1	1	0	1	2	1	2	0	0
11	22	10	5	0	4	1	2	0	2	1	1	1	2	2	3	1	2	2	0	0	0	1	1	1	1	1	0	0	1	1	0	0
11	38	13	3	6	10	3	3	0	15	2	2	2	2	2	3	1	1	1	2	2	2	3	2	2	3	2	1	1	1	1	0	0
15	23	8	6	0	3	1	3	2	10	1	1	2	1	2	1	2	2	2	0	0	0	1	1	0	1	1	0	2	0	1	2	0
11	22	15	2	0	0	1	4	0	60	3	3	3	1	2	3	1	1	0	0	0	0	0	0	0	0	0	1	1	1	2	0	0
10	22	4	6	0	3	1	5	3	250	1	0	0	0	1	2	3	2	1	0	0	0	0	0	1	2	1	0	1	2	2	2	1
7	1	1	0	0	0	0	0	0	0	0	0	0	1	0	0	0	0	0	0	0	0	0	0	0	0	0	0	0	0	0	0	0
11	33	12	5	0	3	4	5	4	10	1	1	2	2	3	3	2	2	1	0	0	0	1	0	1	1	2	2	2	2	1	2	2
12	32	14	2	1	7	1	5	2	10	2	3	1	2	3	3	1	1	0	0	0	1	2	1	2	2	1	0	2	1	2	1	1
9	7	2	1	0	0	1	2	1	0	0	0	0	1	1	0	1	0	0	0	0	0	0	0	0	0	0	1	0	1	1	0	1
13	30	14	2	4	5	2	3	0	15	2	1	2	3	3	3	1	1	0	1	0	3	3	0	1	1	1	1	0	0	3	0	0
20	36	13	8	0	7	1	7	0	130	1	1	3	2	3	3	3	3	2	0	0	0	1	2	3	1	0	1	2	3	2	0	0
11	28	8	8	0	4	0	5	3	10	1	1	1	2	2	1	3	3	2	0	0	0	1	1	1	1	0	0	1	2	2	2	1
12	32	10	8	0	6	0	6	2	20	2	1	0	2	3	2	3	3	2	0	0	0	2	1	1	2	0	0	2	2	2	2	0
8	11	5	0	0	2	2	1	1	10	1	1	1	1	1	0	0	0	0	0	0	0	1	0	0	1	1	1	1	0	0	0	1
14	25	13	2	1	3	0	4	2	0	1	2	1	3	3	3	1	1	0	1	0	0	2	0	1	0	0	0	2	1	1	2	0
4	16	7	0	0	1	0	6	2	0	3	1	0	0	0	3	0	0	0	0	0	0	1	0	0	0	0	0	3	1	2	2	0
18	27	11	0	1	4	3	8	0	70	3	1	2	1	2	2	0	0	0	1	0	0	1	0	2	1	1	2	3	2	3	0	0
3	26	11	7	0	0	1	6	1	10	1	1	2	2	3	2	3	3	1	0	0	0	0	0	0	0	0	1	2	2	2	1	0
10	13	9	2	0	0	0	1	1	5	1	1	2	2	1	2	1	1	0	0	0	0	0	0	0	0	0	0	0	0	1	1	0
18	38	13	8	5	3	0	8	1	200	1	3	1	3	3	2	3	3	2	1	1	3	0	1	2	0	0	0	2	3	3	0	1
12	26	10	5	0	4	2	5	0	5	2	0	1	2	2	3	2	2	1	0	0	0	1	1	1	1	1	1	1	2	2	0	0
7	7	2	2	0	0	2	1	0	0	0	0	1	0	1	0	1	1	0	0	0	0	0	0	0	0	1	1	0	1	0	0	0
7	18	6	5	0	1	3	3	0	0	1	0	0	2	1	2	2	3	0	0	0	0	1	0	0	0	2	1	1	1	1	0	0
12	28	16	3	0	4	0	4	1	50	3	3	2	2	3	3	1	2	0	0	0	0	1	0	2	1	0	0	1	1	2	1	0
9	28	13	0	1	5	2	6	1	5	3	2	1	2	2	3	0	0	0	0	0	1	2	1	1	1	0	2	2	2	2	0	1
11	14	4	2	0	4	0	3	1	5	1	1	1	1	0	0	1	1	0	0	0	0	1	1	1	1	0	0	1	1	1	0	1
10	23	12	1	1	5	0	4	0	3	1	1	2	3	2	3	0	1	0	0	0	1	1	1	2	1	0	0	2	0	2	0	0
11	34	12	4	5	7	0	4	2	30	1	2	2	3	2	2	1	2	1	2	1	2	2	1	2	2	0	0	1	1	2	1	1
5	16	8	6	0	2	0	0	0	5	1	1	1	1	2	2	2	3	1	0	0	0	1	0	0	1	0	0	0	0	0	0	0
11	13	4	1	0	1	2	4	1	5	1	0	0	1	1	1	0	1	0	0	0	0	0	0	0	1	1	1	1	2	1	1	0
16	34	6	8	1	5	3	7	4	50	0	0	1	1	3	1	3	3	2	0	0	1	1	1	1	2	0	3	2	2	3	3	1
9	34	11	5	0	6	5	6	1	5	2	1	3	2	1	2	2	2	1	0	0	0	2	0	2	2	2	3	2	2	2	1	0
16	31	10	6	1	5	0	7	2	1	1	1	3	1	2	2	3	3	0	0	0	1	2	1	1	1	0	0	1	3	3	2	0
12	19	12	4	0	0	1	2	0	5	2	1	1	2	3	3	1	3	0	0	0	0	0	0	0	0	0	1	0	2	0	0	0
13	30	14	3	2	7	0	3	1	10	2	2	1	3	3	3	1	2	0	1	0	1	2	2	2	1	0	0	1	1	1	1	0
11	25	12	7	0	1	1	3	1	15	3	0	2	3	2	2	3	3	1	0	0	0	1	0	0	0	1	0	1	1	1	1	0
14	19	10	0	0	4	1	4	0	5	2	0	1	1	3	3	0	0	0	0	0	0	1	1	2	0	0	1	0	2	2	0	0
8	19	8	5	0	2	1	3	0	5	2	0	1	2	2	1	2	1	2	0	0	0	1	1	0	0	1	0	0	2	1	0	0
8	25	12	3	0	4	1	3	2	5	2	2	2	2	2	2	1	2	0	0	0	0	2	0	1	1	0	1	1	1	1	0	2
9	24	10	4	0	2	2	4	2	4	1	1	2	2	2	2	1	2	1	0	0	0	0	0	1	1	1	1	1	2	1	1	1
3	16	6	0	1	0	5	4	0	0	2	1	2	0	1	0	0	0	0	0	0	1	0	0	0	0	3	2	2	0	2	0	0
8	33	9	0	0	9	6	3	6	35	1	1	2	2	1	2	0	0	0	0	0	0	2	3	2	2	3	3	3	0	0	3	3
10	22	8	7	0	5	0	0	2	10	0	0	1	2	3	2	3	3	1	0	0	0	1	1	1	2	0	0	0	0	0	2	0
7	29	8	2	3	6	1	5	4	25	2	1	1	1	1	2	1	1	0	1	1	1	2	1	2	1	0	1	2	2	1	2	2
9	23	9	0	1	2	4	3	4	10	2	0	2	2	2	1	0	0	0	1	0	0	1	0	1	0	2	2	1	1	1	2	2
13	35	11	0	1	8	5	5	5	400	1	2	3	2	1	2	0	0	0	1	0	0	3	1	2	2	2	3	2	2	1	3	2
16	37	13	5	2	6	3	6	2	10	2	2	1	3	3	2	2	2	1	0	0	2	2	2	1	1	1	2	2	2	2	2	0
12	23	6	5	0	3	2	5	2	10	1	0	0	2	2	1	2	2	1	0	0	0	1	0	2	0	0	2	2	1	2	2	0
17	43	16	7	2	9	1	5	3	20	3	2	2	3	3	3	1	3	3	2	0	0	2	2	2	3	0	1	1	2	2	3	0
5	12	9	0	0	1	0	2	0	5	2	1	0	2	2	2	0	0	0	0	0	0	1	0	0	0	0	0	1	0	1	0	0
12	22	9	4	0	4	1	4	0	6	1	0	1	3	2	2	1	2	1	0	0	0	2	1	1	0	1	0	1	1	2	0	0
9	11	6	2	0	1	1	1	0	5	1	1	1	1	1	1	1	1	0	0	0	0	1	0	0	0	0	1	1	0	0	0	0
13	24	12	2	0	2	1	6	1	10	2	1	1	2	3	3	1	1	0	0	0	0	0	0	1	1	0	1	3	1	2	1	0
6	29	11	3	0	7	3	3	2	2	3	0	0	3	2	3	1	2	0	0	0	0	3	1	1	2	1	2	0	2	1	2	0
11	28	12	5	0	3	3	5	0	10	2	1	1	3	2	3	2	2	1	0	0	0	1	0	1	1	1	2	2	1	2	0	0
3	8	1	3	0	1	1	1	1	2	0	0	1	0	0	0	1	1	1	0	0	0	1	0	0	0	0	1	1	0	0	1	0
16	26	12	1	4	2	1	6	0	15	3	2	3	1	1	2	0	1	0	1	1	2	1	0	0	1	0	1	1	2	3	0	0
7	10	3	4	0	1	0	2	0	8	1	0	0	1	0	1	2	2	0	0	0	0	1	0	0	0	0	0	1	0	1	0	0
10	22	10	0	1	4	0	7	0	30	2	1	0	2	3	2	0	0	0	1	0	0	2	0	2	0	0	0	2	2	3	0	0
0	1	0	0	0	1	0	0	0	0	0	0	0	0	0	0	0	0	0	0	0	0	1	0	0	0	0	0	0	0	0	0	0
15	34	14	5	2	5	1	5	2	5	2	2	2	3	2	3	2	2	1	1	0	1	2	1	2	0	1	0	0	3	2	2	0
9	18	6	2	0	2	5	3	0	0	3	0	1	1	0	1	0	2	0	0	0	0	1	0	0	1	3	2	1	1	1	0	0
17	48	17	6	0	11	4	8	2	30	3	3	2	3	3	3	3	3	0	0	0	0	3	3	3	2	2	2	2	3	3	2	0
12	34	11	6	1	6	4	6	0	10	2	1	2	3	2	1	2	2	2	0	0	1	2	1	1	2	2	2	2	1	3	0	0
13	37	14	3	1	8	3	5	3	50	3	2	1	3	2	3	2	1	0	1	0	0	2	2	2	2	1	2	1	2	2	1	2
9	24	9	5	0	4	0	5	1	10	1	1	1	2	2	2	2	2	1	0	0	0	1	1	1	1	0	0	1	2	2	1	0
12	31	13	5	1	2	1	7	2	30	2	1	2	2	3	3	1	3	1	0	0	1	0	0	1	1	0	1	2	3	2	2	0
10	17	7	4	0	1	1	4	0	5	2	1	0	2	1	1	2	2	0	0	0	0	0	0	1	0	1	0	2	1	1	0	0
13	29	15	3	0	4	1	5	1	10	2	1	3	3	3	3	0	1	2	0	0	0	1	1	2	0	0	1	1	2	2	1	0
9	33	14	3	3	5	2	3	3	0	2	2	3	2	3	2	1	1	1	2	0	1	2	0	1	2	1	1	1	1	1	2	1
5	13	1	5	0	2	0	4	1	5	0	0	0	1	0	0	2	2	1	0	0	0	1	0	0	1	0	0	2	1	1	1	0
13	29	9	5	0	3	4	5	3	5	1	1	1	2	2	2	2	2	1	0	0	0	1	0	1	1	2	2	1	2	2	2	1
8	32	15	6	0	2	2	5	2	15	2	2	2	3	3	3	2	3	1	0	0	0	1	0	1	0	1	1	2	2	1	2	0
10	20	11	2	0	4	0	3	0	500	2	1	2	2	2	2	0	2	0	0	0	0	1	1	1	1	0	0	1	1	1	0	0
7	14	5	2	0	5	1	1	0	30	1	0	1	2	1	0	1	1	0	0	0	0	1	1	2	1	1	0	0	1	0	0	0
9	23	8	2	3	6	0	4	0	10	3	2	1	1	1	0	1	1	0	1	0	2	2	1	1	2	0	0	2	0	2	0	0
13	32	11	4	2	6	1	5	3	20	2	1	2	3	2	1	2	1	1	1	0	1	2	1	1	2	1	0	1	2	2	1	2
15	18	7	1	1	3	0	6	0	10	3	2	1	0	1	0	0	1	0	1	0	0	1	1	1	0	0	0	3	1	2	0	0
12	27	9	4	2	6	0	5	1	5	1	1	0	3	2	2	1	1	2	1	0	1	1	2	2	1	0	0	2	1	2	1	0
0	11	1	1	0	3	3	2	1	0	0	0	0	1	0	0	0	1	0	0	0	0	1	1	1	0	2	1	0	1	1	0	1
9	17	10	2	1	2	1	1	0	7	0	1	2	2	3	2	0	2	0	1	0	0	1	0	1	0	1	0	1	0	0	0	0
5	10	4	3	0	2	0	0	1	5	0	0	0	2	1	1	0	3	0	0	0	0	1	0	0	1	0	0	0	0	0	0	1
9	28	18	1	0	0	0	8	1	25	3	3	3	3	3	3	0	0	1	0	0	0	0	0	0	0	0	0	2	3	3	1	0
12	16	7	3	0	3	0	3	0	6	1	0	1	1	2	2	1	2	0	0	0	0	1	0	1	1	0	0	1	1	1	0	0
12	31	12	1	1	4	2	7	4	70	3	0	1	3	3	2	0	1	0	1	0	0	2	0	2	0	1	1	2	3	2	1	3
8	17	10	0	3	1	0	0	3	10	2	1	1	1	2	3	0	0	0	1	0	2	0	0	0	1	0	0	0	0	0	0	3
6	9	3	5	0	0	0	1	0	15	1	0	0	1	1	0	2	2	1	0	0	0	0	0	0	0	0	0	1	0	0	0	0
15	31	11	5	1	6	1	4	3	30	1	2	1	2	3	2	1	3	1	0	0	1	2	1	1	2	0	1	1	1	2	2	1
17	40	14	9	2	2	1	6	6	20	1	2	3	2	3	3	3	3	3	1	0	1	0	0	2	0	1	0	2	3	1	3	3
16	35	13	4	3	8	0	5	2	25	2	2	1	3	2	3	1	2	1	1	1	1	2	2	2	2	0	0	1	2	2	1	1
19	52	15	5	3	9	5	9	6	25	2	2	2	3	3	3	2	2	1	2	0	1	2	3	3	1	2	3	3	3	3	3	3
12	39	11	9	0	9	3	4	3	30	1	1	2	2	2	3	3	3	3	0	0	0	2	2	2	3	2	1	2	1	1	1	2
2	16	8	6	0	1	0	1	0	5	2	0	0	2	3	1	2	3	1	0	0	0	0	0	0	1	0	0	0	1	0	0	0
15	24	9	4	0	7	0	4	0	20	2	1	0	2	2	2	2	2	0	0	0	0	2	1	2	2	0	0	1	1	2	0	0
8	18	11	0	0	1	2	4	0	10	3	1	1	3	1	2	0	0	0	0	0	0	0	0	1	0	0	2	1	2	1	0	0
15	37	11	7	3	2	2	6	6	30	1	0	2	2	3	3	2	3	2	1	1	1	1	0	1	0	1	1	2	2	2	3	3
4	19	10	1	1	4	0	3	0	2	2	2	1	2	1	2	0	1	0	1	0	0	2	0	1	1	0	0	1	1	1	0	0
14	21	9	2	1	4	1	4	0	30	1	2	1	1	3	1	0	1	1	0	0	1	1	1	1	1	0	1	2	1	1	0	0
7	21	11	5	0	2	0	3	0	5	1	1	2	2	2	3	2	2	1	0	0	0	1	0	1	0	0	0	0	1	2	0	0
10	28	11	0	0	6	2	8	1	0	3	1	2	1	1	3	0	0	0	0	0	0	1	1	2	2	1	1	3	3	2	1	0
13	28	11	0	2	4	6	5	0	0	1	2	3	3	0	2	0	0	0	1	0	1	2	0	1	1	3	3	2	1	2	0	0
13	15	6	2	0	0	1	6	0	20	3	0	2	0	1	0	1	1	0	0	0	0	0	0	0	0	0	1	2	2	2	0	0
14	28	9	5	1	5	1	6	1	2	1	1	2	2	2	1	2	2	1	1	0	0	2	2	1	0	0	1	2	2	2	1	0
12	22	8	7	0	4	0	3	0	7	1	0	1	2	2	2	3	3	1	0	0	0	2	0	1	1	0	0	1	1	1	0	0
16	37	15	7	1	6	2	5	1	20	2	1	3	3	3	3	3	3	1	0	0	1	2	1	2	1	1	1	1	2	2	1	0
7	19	8	5	0	0	0	3	3	3	1	1	1	1	2	2	2	2	1	0	0	0	0	0	0	0	0	0	1	1	1	1	2
13	19	9	2	0	1	2	4	1	10	2	1	1	2	2	1	1	1	0	0	0	0	0	1	0	0	1	1	1	1	2	0	1
6	19	4	3	0	3	0	9	0	5	0	0	0	3	0	1	2	1	0	0	0	0	3	0	0	0	0	0	3	3	3	0	0
16	22	7	4	1	3	0	5	2	10	1	0	0	3	1	2	2	2	0	0	0	1	2	0	0	1	0	0	1	2	2	2	0
8	18	8	3	0	2	1	3	1	10	1	1	1	2	2	1	1	1	1	0	0	0	1	0	0	1	0	1	1	1	1	1	0
8	16	3	4	0	2	1	5	1	10	0	0	0	1	1	1	1	2	1	0	0	0	1	0	1	0	0	1	2	2	1	1	0
10	23	9	1	0	3	4	3	3	10	2	0	1	2	2	2	0	1	0	0	0	0	1	1	1	0	2	2	1	1	1	1	2
13	38	16	7	1	3	2	5	4	90	3	2	2	3	3	3	3	3	1	1	0	0	1	0	1	1	1	1	1	2	2	2	2
13	32	14	4	1	6	0	5	2	2	2	2	1	3	3	3	1	2	1	1	0	0	2	1	1	2	0	0	2	1	2	2	0
11	25	11	6	1	3	1	3	0	10	1	2	2	1	2	3	2	2	2	0	0	1	1	0	1	1	1	0	0	1	2	0	0
12	24	9	6	1	2	0	6	0	10	1	0	1	1	3	3	2	3	1	0	0	1	1	0	0	1	0	0	2	2	2	0	0
13	20	7	5	0	5	0	3	0	60	0	1	1	2	2	1	1	2	2	0	0	0	2	1	1	1	0	0	1	1	1	0	0
10	17	6	5	0	0	2	4	0	20	2	0	0	2	1	1	2	2	1	0	0	0	0	0	0	0	0	2	1	2	1	0	0
10	32	9	4	4	6	1	7	1	75	2	1	1	3	0	2	1	2	1	2	0	2	2	0	2	2	0	1	2	2	3	0	1
10	15	6	3	0	4	0	2	0	1	0	1	1	1	2	1	1	2	0	0	0	0	2	0	1	1	0	0	1	1	0	0	0
11	20	7	4	1	5	0	2	1	10	1	0	0	2	2	2	1	2	1	0	0	1	1	1	2	1	0	0	0	1	1	0	1
14	34	15	5	0	6	2	4	2	15	3	2	1	3	3	3	2	2	1	0	0	0	1	1	2	2	1	1	1	2	1	2	0
10	25	8	7	0	4	0	4	2	10	1	0	1	3	2	1	3	3	1	0	0	0	2	0	1	1	0	0	2	1	1	2	0
16	25	9	4	0	3	2	5	2	30	1	0	1	2	3	2	1	2	1	0	0	0	0	1	1	1	1	1	2	2	1	2	0
11	19	10	0	0	7	0	2	0	10	2	0	1	2	3	2	0	0	0	0	0	0	2	2	3	0	0	0	0	2	0	0	0
13	29	11	0	2	4	3	7	2	5	2	2	1	1	3	2	0	0	0	0	0	2	1	0	2	1	1	2	2	2	3	0	2
16	38	10	5	5	7	3	6	2	10	2	1	1	2	2	2	2	2	1	2	0	3	2	1	2	2	1	2	2	2	2	1	1
15	35	15	4	0	4	4	4	4	5	3	2	3	2	2	3	1	2	1	0	0	0	1	0	1	2	2	2	2	2	0	2	2
13	38	13	6	4	4	3	6	2	10	2	1	3	3	3	1	3	3	0	2	0	2	0	0	2	2	1	2	2	2	2	2	0
10	27	9	8	0	2	2	3	3	10	1	1	1	2	2	2	3	3	2	0	0	0	1	0	0	1	1	1	1	2	0	2	1
7	32	12	5	0	3	4	5	3	0	2	2	2	3	1	2	2	2	1	0	0	0	2	0	1	0	2	2	1	2	2	2	1
10	14	7	1	0	2	0	2	2	30	2	0	1	2	1	1	0	1	0	0	0	0	1	0	1	0	0	0	1	0	1	2	0
14	34	10	8	0	7	3	5	1	5	1	1	1	2	2	3	3	2	3	0	0	0	2	2	2	1	1	2	1	2	2	1	0
6	12	4	2	0	0	2	3	1	0	1	0	0	1	2	0	1	1	0	0	0	0	0	0	0	0	1	1	1	1	1	1	0
11	25	9	5	0	3	1	3	4	10	1	1	0	2	3	2	2	2	1	0	0	0	1	0	1	1	1	0	1	1	1	2	2
10	25	10	4	3	1	4	2	1	20	1	0	0	3	3	3	1	3	0	1	0	2	1	0	0	0	1	3	1	1	0	1	0
15	35	12	8	0	6	1	5	3	30	2	2	2	2	2	2	3	2	3	0	0	0	2	2	1	1	1	0	1	2	2	2	1
11	35	13	4	1	7	4	5	1	20	1	2	2	3	2	3	1	2	1	1	0	0	2	1	2	2	2	2	1	2	2	1	0
17	41	17	4	2	5	1	8	4	100	3	2	3	3	3	3	2	2	0	1	0	1	2	0	2	1	1	0	2	3	3	2	2
16	26	12	3	0	6	1	4	0	20	2	1	1	2	3	3	1	2	0	0	0	0	1	2	2	1	0	1	0	2	2	0	0
7	11	1	7	0	0	0	3	0	6	0	0	0	0	1	0	3	2	2	0	0	0	0	0	0	0	0	0	2	0	1	0	0
13	30	12	3	0	6	3	6	0	10	2	1	0	3	3	3	1	1	1	0	0	0	1	2	2	1	1	2	2	2	2	0	0
10	31	11	8	0	6	1	5	0	10	1	1	2	2	3	2	3	3	2	0	0	0	2	0	2	2	1	0	1	2	2	0	0
12	34	13	0	4	7	1	7	2	15	2	2	3	1	3	2	0	0	0	1	1	2	2	1	2	2	0	1	2	2	3	2	0
6	18	7	0	0	1	2	8	0	15	3	1	1	1	0	1	0	0	0	0	0	0	0	0	0	1	1	1	2	3	3	0	0
14	28	13	2	0	6	0	7	0	10	3	1	3	1	2	3	1	1	0	0	0	0	2	1	2	1	0	0	2	2	3	0	0
11	30	15	7	0	1	1	6	0	10	2	3	1	3	3	3	2	3	2	0	0	0	1	0	0	0	0	1	2	2	2	0	0
1	4	1	1	0	0	1	1	0	5	0	0	0	1	0	0	0	1	0	0	0	0	0	0	0	0	0	1	1	0	0	0	0
14	30	11	0	4	5	0	9	1	30	3	1	0	2	3	2	0	0	0	1	1	2	3	1	1	0	0	0	3	3	3	1	0
11	21	13	1	0	1	2	4	0	10	2	3	2	2	3	1	0	1	0	0	0	0	0	0	0	1	0	2	2	0	2	0	0
16	41	16	4	4	9	1	7	0	200	3	2	2	3	3	3	1	2	1	2	0	2	3	1	2	3	0	1	2	2	3	0	0
20	33	12	3	1	8	0	6	3	800	2	1	0	3	3	3	1	2	0	0	0	1	2	2	3	1	0	0	1	3	2	1	2
18	39	14	7	3	9	0	4	2	35	2	2	1	3	3	3	2	3	2	1	0	2	3	2	2	2	0	0	1	1	2	2	0
10	19	7	5	1	3	0	1	2	5	1	0	1	1	2	2	1	3	1	0	0	1	1	0	2	0	0	0	0	0	1	2	0
10	21	12	0	1	5	0	3	0	1	2	0	1	3	3	3	0	0	0	0	0	1	2	0	1	2	0	0	0	1	2	0	0
20	42	15	6	6	8	0	5	2	80	3	3	1	2	3	3	2	3	1	2	1	3	2	2	2	2	0	0	2	0	3	2	0
7	19	9	3	0	2	1	2	2	5	2	1	1	1	2	2	0	2	1	0	0	0	0	1	1	0	0	1	1	0	1	2	0
12	19	9	5	0	2	0	3	0	15	2	0	0	3	2	2	2	2	1	0	0	0	1	0	1	0	0	0	1	1	1	0	0
13	32	13	7	0	4	2	6	0	10	2	1	2	3	3	2	3	3	1	0	0	0	1	0	2	1	0	2	1	3	2	0	0
15	40	17	5	2	3	4	8	1	35	3	2	3	3	3	3	1	3	1	1	0	1	1	0	1	1	2	2	2	3	3	1	0
14	24	8	3	1	7	0	4	1	50	0	0	1	1	3	3	0	3	0	1	0	0	1	2	2	2	0	0	1	2	1	1	0
12	40	14	6	2	4	3	6	5	12	2	1	3	3	2	3	3	2	1	2	0	0	0	0	2	2	2	1	3	2	1	2	3
10	11	3	1	2	1	0	3	1	5	0	0	1	1	1	0	0	1	0	1	0	1	1	0	0	0	0	0	1	1	1	0	1
8	19	7	0	0	2	4	5	1	5	3	0	2	2	0	0	0	0	0	0	0	0	0	0	1	1	1	3	3	1	1	0	1
14	26	10	6	0	4	2	3	1	10	1	0	0	3	3	3	2	2	2	0	0	0	2	0	2	0	1	1	2	0	1	1	0
13	25	11	6	0	4	0	3	1	15	0	1	3	1	3	3	2	3	1	0	0	0	1	1	1	1	0	0	2	0	1	1	0
10	27	9	6	1	3	1	5	2	10	1	1	1	2	2	2	2	3	1	1	0	0	1	0	1	1	1	0	2	2	1	2	0
12	22	8	2	0	7	2	3	0	5	1	0	1	3	1	2	0	2	0	0	0	0	2	1	2	2	0	2	1	2	0	0	0
15	30	12	6	1	6	0	2	3	20	2	2	1	2	3	2	3	2	1	0	0	1	2	1	2	1	0	0	1	1	0	2	1
10	12	4	3	0	3	0	1	1	20	0	0	1	1	1	1	1	1	1	0	0	0	1	0	1	1	0	0	0	1	0	1	0
8	10	5	1	0	1	0	2	1	25	1	0	0	2	1	1	0	1	0	0	0	0	0	0	1	0	0	0	0	1	1	1	0
14	33	13	3	1	5	2	5	4	25	1	1	2	3	3	3	1	2	0	0	0	1	1	1	2	1	1	1	2	1	2	3	1
15	33	12	6	2	4	2	6	1	20	1	1	1	3	3	3	2	2	2	1	0	1	1	0	2	1	1	1	2	2	2	1	0
11	27	9	7	2	4	0	4	1	6	1	0	0	2	3	3	2	3	2	2	0	0	1	1	1	1	0	0	1	1	2	1	0
10	28	8	4	1	6	3	5	1	0	1	1	1	1	2	2	1	2	1	0	0	1	1	2	1	2	1	2	2	1	2	1	0
14	38	13	1	3	5	6	7	3	15	2	1	2	2	3	3	1	0	0	1	0	2	2	1	2	0	3	3	2	3	2	1	2
7	20	4	7	0	3	2	3	1	5	0	0	0	2	1	1	2	2	3	0	0	0	2	0	0	1	0	2	2	0	1	1	0
9	29	9	5	1	5	4	3	2	15	1	1	2	3	2	0	1	2	2	1	0	0	2	1	2	0	1	3	1	2	0	2	0
11	24	8	5	1	4	1	3	2	10	1	1	1	2	1	2	2	2	1	1	0	0	1	1	1	1	1	0	1	1	1	1	1
11	19	5	4	0	2	2	5	1	5	0	0	0	2	2	1	1	2	1	0	0	0	1	0	1	0	1	1	2	2	1	1	0
5	13	2	4	0	0	2	5	0	10	0	0	0	1	1	0	1	2	1	0	0	0	0	0	0	0	1	1	2	1	2	0	0
15	32	11	6	0	6	2	4	3	20	1	1	1	3	3	2	2	2	2	0	0	0	2	1	1	2	1	1	1	1	2	2	1
4	20	9	3	0	2	1	5	0	20	2	1	0	2	2	2	1	2	0	0	0	0	2	0	0	0	0	1	2	1	2	0	0
12	38	14	7	0	7	0	6	4	50	1	2	3	2	3	3	2	3	2	0	0	0	2	1	3	1	0	0	2	2	2	3	1
12	29	12	3	3	3	0	6	2	15	1	1	2	2	3	3	1	1	1	2	0	1	1	0	1	1	0	0	2	2	2	2	0
4	10	5	0	0	1	0	3	1	5	2	0	1	0	1	1	0	0	0	0	0	0	0	0	1	0	0	0	1	1	1	0	1
13	46	17	4	6	8	4	5	2	3	3	3	2	3	3	3	1	2	1	1	2	3	1	2	3	2	2	2	1	2	2	1	1
6	10	4	0	0	4	2	0	0	5	0	0	1	1	1	1	0	0	0	0	0	0	1	2	1	0	1	1	0	0	0	0	0
13	41	16	6	4	7	1	4	3	15	2	2	3	3	3	3	2	3	1	2	0	2	2	2	1	2	1	0	1	1	2	2	1
12	36	14	3	0	3	4	6	6	30	2	1	2	3	3	3	1	2	0	0	0	0	1	0	1	1	2	2	2	1	3	3	3
8	17	11	0	0	1	3	2	0	3.3	2	0	1	2	3	3	0	0	0	0	0	0	1	0	0	0	1	2	1	0	1	0	0
9	28	12	5	1	3	0	6	1	20	2	2	2	2	3	1	2	2	1	0	0	1	1	0	0	2	0	0	2	2	2	1	0
10	15	6	1	0	4	0	1	3	1	0	1	2	1	1	1	0	1	0	0	0	0	2	0	1	1	0	0	0	0	1	1	2
11	28	12	4	0	5	1	5	1	20	1	1	2	3	2	3	1	2	1	0	0	0	1	1	2	1	0	1	1	2	2	1	0
10	21	6	3	1	3	4	1	3	10	1	1	0	2	0	2	1	2	0	1	0	0	1	0	2	0	1	3	0	0	1	1	2
10	32	18	5	0	2	1	4	2	10	3	3	3	3	3	3	1	3	1	0	0	0	0	0	1	1	0	1	1	1	2	1	1
12	27	11	4	0	4	1	6	1	20	3	1	1	2	2	2	1	2	1	0	0	0	2	0	1	1	0	1	2	2	2	1	0
0	14	3	6	0	2	1	2	0	0	0	0	0	1	1	1	3	1	2	0	0	0	1	0	1	0	0	1	1	0	1	0	0
13	31	13	3	1	7	1	6	0	5	3	1	0	3	3	3	1	2	0	0	0	1	2	1	2	2	1	0	2	2	2	0	0
16	29	12	2	0	7	1	3	4	10	2	1	1	2	3	3	0	1	1	0	0	0	2	1	2	2	0	1	1	1	1	2	2
14	26	12	1	1	6	2	3	1	10	1	2	1	2	3	3	0	1	0	0	0	1	2	1	1	2	1	1	1	1	1	0	1
14	48	16	5	4	8	3	7	5	25	2	2	3	3	3	3	2	2	1	0	2	2	3	1	1	3	1	2	2	2	3	3	2
14	23	7	6	0	3	0	5	2	10	1	0	2	1	1	2	3	2	1	0	0	0	1	1	1	0	0	0	1	2	2	1	1
10	27	12	6	0	1	3	3	2	5	2	1	1	3	3	2	2	3	1	0	0	0	1	0	0	0	0	3	1	0	2	2	0
11	32	12	4	2	7	3	4	0	70	1	1	2	2	3	3	1	2	1	1	0	1	2	2	2	1	1	2	1	2	1	0	0
15	45	12	9	1	6	3	9	5	100	2	1	1	3	3	2	3	3	3	0	0	1	1	1	1	3	1	2	3	3	3	3	2
12	26	14	0	2	2	3	5	0	15	2	1	3	3	3	2	0	0	0	1	0	1	0	0	1	1	1	2	2	1	2	0	0
12	21	7	6	0	3	0	5	0	10	1	0	0	2	2	2	2	3	1	0	0	0	1	0	1	1	0	0	2	2	1	0	0
11	12	3	5	0	2	0	2	0	8	0	0	0	1	1	1	2	2	1	0	0	0	0	1	1	0	0	0	0	1	1	0	0
7	14	7	1	0	1	0	5	0	5	2	0	0	1	2	2	0	1	0	0	0	0	1	0	0	0	0	0	2	1	2	0	0
8	22	10	3	0	5	0	3	1	5	1	1	1	3	2	2	1	2	0	0	0	0	1	1	1	2	0	0	1	1	1	1	0
12	30	9	6	3	6	0	6	0	40	1	1	1	2	2	2	2	2	2	0	1	2	2	0	2	2	0	0	2	2	2	0	0
11	21	8	2	0	2	2	5	2	15	1	0	1	2	2	2	0	2	0	0	0	0	1	0	1	0	1	1	2	2	1	2	0
11	25	11	5	0	4	0	4	1	3	1	1	2	2	3	2	2	2	1	0	0	0	1	1	1	1	0	0	1	2	1	1	0
13	35	13	8	0	7	0	5	2	5	3	1	0	3	3	3	3	3	2	0	0	0	2	0	2	3	0	0	1	2	2	2	0
7	23	12	4	0	2	1	4	0	25	1	1	2	3	3	2	1	2	1	0	0	0	1	0	0	1	1	0	1	1	2	0	0
15	48	15	5	6	8	4	7	3	50	2	2	2	3	3	3	1	2	2	2	2	2	3	1	2	2	1	3	2	3	2	2	1
15	21	6	3	3	4	0	3	2	7.99	1	1	1	1	1	1	1	1	1	1	1	1	1	1	1	1	0	0	1	1	1	1	1
8	20	8	1	1	5	1	4	0	5	2	0	0	2	2	2	0	1	0	0	0	1	2	1	2	0	0	1	1	1	2	0	0
15	27	8	5	2	6	1	3	2	15	1	0	2	2	2	1	2	2	1	2	0	0	2	1	2	1	1	0	1	1	1	1	1
13	37	14	6	0	5	3	6	3	30	2	0	3	3	3	3	2	2	2	0	0	0	1	1	2	1	1	2	2	2	2	2	1
18	36	12	4	2	4	4	6	4	255	2	2	2	2	2	2	1	2	1	1	0	1	1	1	1	1	2	2	2	2	2	2	2
10	23	9	0	3	4	0	3	4	5	2	1	1	1	2	2	0	0	0	1	1	1	2	0	1	1	0	0	1	1	1	2	2
7	22	3	8	0	7	0	4	0	2	0	0	0	1	1	1	3	3	2	0	0	0	2	1	2	2	0	0	2	1	1	0	0
9	30	12	4	0	2	4	5	3	25	2	1	1	2	3	3	2	2	0	0	0	0	0	0	1	1	2	2	2	1	2	2	1
16	35	13	6	0	7	1	6	2	35	2	1	1	3	3	3	2	3	1	0	0	0	1	2	3	1	0	1	2	2	2	1	1
12	22	8	7	0	3	0	3	1	20	1	0	1	2	2	2	3	3	1	0	0	0	1	0	1	1	0	0	1	1	1	1	0
8	9	5	0	0	2	0	1	1	0	0	0	0	1	2	2	0	0	0	0	0	0	1	0	1	0	0	0	0	1	0	1	0
9	22	9	8	0	4	0	0	1	20	1	1	1	3	2	1	3	3	2	0	0	0	3	0	1	0	0	0	0	0	0	1	0
8	28	9	2	2	1	6	7	1	15	1	1	2	0	3	2	0	2	0	1	0	1	1	0	0	0	3	3	2	3	2	1	0
11	26	14	1	0	2	2	5	2	20	2	1	2	3	3	3	0	1	0	0	0	0	1	0	1	0	1	1	1	2	2	1	1
9	30	13	5	0	4	2	6	0	5	2	0	2	3	3	3	1	3	1	0	0	0	1	0	1	2	0	2	2	2	2	0	0
11	31	13	5	2	3	2	4	2	10	2	2	2	3	2	2	2	2	1	1	0	1	1	0	1	1	1	1	1	2	1	1	1
17	40	14	7	1	7	1	7	3	20	2	2	2	2	3	3	2	3	2	0	0	1	2	2	2	1	0	1	2	2	3	2	1
14	36	14	1	1	7	4	7	2	20	2	2	1	3	3	3	0	1	0	1	0	0	2	2	2	1	2	2	3	1	3	2	0
14	43	12	7	6	6	2	7	3	5	1	2	2	2	3	2	3	3	1	2	2	2	3	0	2	1	1	1	2	3	2	1	2
11	31	14	6	1	5	0	4	1	60	2	2	1	3	3	3	2	3	1	0	0	1	2	0	2	1	0	0	1	2	1	1	0
15	34	14	5	3	6	1	4	1	15	2	2	1	3	3	3	2	2	1	1	1	1	2	2	2	0	0	1	1	2	1	1	0
10	14	5	3	0	0	0	4	2	20	1	1	0	1	2	0	2	1	0	0	0	0	0	0	0	0	0	0	1	1	2	2	0
14	29	11	6	2	3	0	5	2	10	2	0	2	3	2	2	2	2	2	2	0	0	1	0	2	0	0	0	2	2	1	2	0
1	23	8	4	0	1	0	7	3	5	2	0	0	2	3	1	3	1	0	0	0	0	1	0	0	0	0	0	2	3	2	3	0
15	32	15	1	1	5	3	6	1	5	3	1	2	3	3	3	0	1	0	1	0	0	1	1	1	2	1	2	2	2	2	0	1
13	18	7	3	0	1	1	6	0	3	1	0	1	1	2	2	1	2	0	0	0	0	0	0	1	0	0	1	2	2	2	0	0
11	27	10	0	2	6	1	6	2	10	3	1	3	1	2	0	0	0	0	1	0	1	2	1	1	2	0	1	2	2	2	1	1
8	11	6	1	0	1	1	2	0	5	1	1	1	1	1	1	0	1	0	0	0	0	1	0	0	0	1	0	1	1	0	0	0
12	20	9	5	1	2	0	3	0	3	0	0	0	3	3	3	2	2	1	1	0	0	1	0	1	0	0	0	1	1	1	0	0
15	21	5	6	2	3	0	3	2	10	1	0	0	1	2	1	2	2	2	0	1	1	0	1	1	1	0	0	1	1	1	2	0
12	27	8	6	0	2	3	6	2	75	1	1	1	2	2	1	2	2	2	0	0	0	1	0	1	0	1	2	2	2	2	1	1
11	22	10	1	1	2	3	5	0	80	2	1	1	2	2	2	0	1	0	1	0	0	0	0	2	0	1	2	1	2	2	0	0
0	9	2	5	0	2	0	0	0	0	0	0	0	1	1	0	2	2	1	0	0	0	1	0	0	1	0	0	0	0	0	0	0
12	24	5	7	1	5	1	5	0	100	0	0	0	1	2	2	3	3	1	0	0	1	3	1	1	0	0	1	2	2	1	0	0
15	21	8	1	1	2	2	6	1	10	1	0	1	2	2	2	0	1	0	1	0	0	1	1	0	0	1	1	2	2	2	1	0
9	19	7	0	1	1	2	6	2	5	3	0	0	2	2	0	0	0	0	0	0	1	1	0	0	0	0	2	2	3	1	1	1
8	9	2	3	0	2	1	1	0	3	0	0	1	1	0	0	1	1	1	0	0	0	1	0	0	1	0	1	1	0	0	0	0
14	26	13	0	2	2	2	3	4	25	2	1	2	3	2	3	0	0	0	1	0	1	0	0	1	1	1	1	1	2	0	2	2
14	30	11	7	0	4	2	6	0	5	0	0	3	2	3	3	3	3	1	0	0	0	1	0	2	1	1	1	2	2	2	0	0
7	12	3	4	0	3	0	2	0	0	0	1	0	1	1	0	3	0	1	0	0	0	1	0	1	1	0	0	1	1	0	0	0
8	18	10	3	0	1	2	2	0	10	2	2	1	2	1	2	1	1	1	0	0	0	1	0	0	0	1	1	1	0	1	0	0
13	16	6	0	2	4	3	1	0	2	1	1	0	1	2	1	0	0	0	1	0	1	1	1	1	1	2	1	1	0	0	0	0
0	21	6	8	0	1	0	6	0	5	1	0	0	2	2	1	3	3	2	0	0	0	1	0	0	0	0	0	2	2	2	0	0
4	20	7	6	0	1	1	4	1	1	0	0	0	2	2	3	3	3	0	0	0	0	0	0	1	0	0	1	1	1	2	1	0
6	17	8	3	0	0	0	4	2	10	1	1	0	3	1	2	1	1	1	0	0	0	0	0	0	0	0	0	2	2	0	1	1
12	24	10	8	0	3	0	2	1	3	2	1	0	2	3	2	2	3	3	0	0	0	1	0	1	1	0	0	0	1	1	1	0
7	18	10	0	2	1	0	3	2	2	2	0	0	3	2	3	0	0	0	2	0	0	0	0	1	0	0	0	1	1	1	1	1
11	34	14	9	0	3	1	5	2	5	2	2	1	3	3	3	3	3	3	0	0	0	2	0	1	0	1	0	1	2	2	1	1
11	27	12	4	2	4	0	2	3	8	2	1	0	3	3	3	1	3	0	1	0	1	2	0	1	1	0	0	1	0	1	1	2
12	21	6	6	1	1	0	5	2	30	0	0	0	2	2	2	2	3	1	0	0	1	1	0	0	0	0	0	2	2	1	2	0
17	41	13	5	1	9	1	8	4	20	3	1	2	2	3	2	1	1	3	1	0	0	3	2	2	2	0	1	3	3	2	2	2
16	36	13	6	0	6	1	6	4	10	2	1	1	3	3	3	2	2	2	0	0	0	2	1	2	1	0	1	2	2	2	2	2
4	16	6	1	0	2	4	3	0	10	2	0	0	2	1	1	0	1	0	0	0	0	2	0	0	0	1	3	1	1	1	0	0
9	28	9	7	0	3	3	4	2	5	2	0	1	3	1	2	3	3	1	0	0	0	1	1	1	0	1	2	2	1	1	2	0
17	30	13	5	0	7	2	3	0	20	1	1	2	3	3	3	1	3	1	0	0	0	1	1	2	3	1	1	2	0	1	0	0
9	32	14	6	0	4	3	5	0	0	2	1	2	3	3	3	2	2	2	0	0	0	1	0	2	1	0	3	1	2	2	0	0
15	44	14	6	3	10	0	8	3	10	1	2	3	2	3	3	3	3	0	1	0	2	3	3	1	3	0	0	3	3	2	2	1
10	24	10	4	0	4	0	5	1	18.98	1	1	1	2	2	3	2	2	0	0	0	0	1	1	1	1	0	0	2	2	1	1	0
15	43	18	7	2	5	2	5	4	10	3	3	3	3	3	3	3	3	1	0	1	1	1	1	2	1	1	1	1	2	2	2	2
10	28	11	4	0	4	1	6	2	10	2	2	2	2	2	1	1	2	1	0	0	0	1	1	0	2	1	0	2	2	2	1	1
9	25	10	5	0	4	1	5	0	10	2	0	1	3	2	2	2	3	0	0	0	0	2	0	0	2	0	1	1	3	1	0	0
14	23	12	3	1	6	1	0	0	10	2	1	1	3	2	3	0	2	1	0	0	1	2	0	2	2	0	1	0	0	0	0	0
12	18	9	2	0	2	0	5	0	5	2	0	0	3	2	2	1	1	0	0	0	0	0	0	1	1	0	0	2	1	2	0	0
12	25	9	2	1	5	2	3	3	20	1	1	2	2	1	2	1	1	0	0	0	1	1	1	1	2	1	1	1	1	1	1	2
14	36	16	3	0	11	2	4	0	5	3	3	1	3	3	3	1	1	1	0	0	0	3	3	3	2	1	1	1	1	2	0	0
7	17	6	4	0	2	0	4	1	10	1	1	0	1	2	1	2	2	0	0	0	0	1	0	0	1	0	0	1	2	1	1	0
11	17	7	2	1	4	2	1	0	5	1	0	0	2	2	2	1	1	0	1	0	0	2	1	1	0	1	1	0	0	1	0	0
9	14	4	6	0	0	0	3	1	15	0	0	1	0	2	1	3	2	1	0	0	0	0	0	0	0	0	0	1	1	1	1	0
11	12	3	5	0	1	0	3	0	5	0	0	0	1	1	1	2	2	1	0	0	0	1	0	0	0	0	0	1	1	1	0	0
10	23	11	1	1	2	3	3	2	5	3	0	1	2	3	2	0	1	0	0	0	1	1	0	1	0	1	2	1	1	1	0	2
15	23	12	1	0	3	2	4	1	4	3	2	1	2	2	2	0	1	0	0	0	0	1	0	2	0	1	1	2	0	2	1	0
7	30	15	1	1	4	0	5	4	15	2	1	3	3	3	3	0	1	0	0	0	1	2	1	1	0	0	0	2	2	1	2	2
12	38	15	6	1	5	4	6	1	5	2	2	2	3	3	3	2	2	2	0	0	1	2	0	1	2	2	2	2	2	2	1	0
9	31	12	6	1	7	1	4	0	5	0	2	1	3	3	3	2	2	2	0	0	1	3	0	2	2	1	0	2	1	1	0	0
15	31	15	3	1	4	0	4	4	50	2	2	2	3	3	3	1	2	0	1	0	0	0	1	1	2	0	0	1	1	2	2	2
11	30	14	0	1	5	2	4	4	20	2	1	2	3	3	3	0	0	0	1	0	0	1	1	2	1	1	1	1	1	2	2	2
15	31	9	6	2	5	2	4	3	15	2	1	1	1	2	2	2	3	1	0	1	1	1	1	1	2	1	1	1	1	2	2	1
12	14	6	3	1	2	0	2	0	5	1	0	1	0	2	2	0	3	0	0	0	1	1	0	0	1	0	0	0	1	1	0	0
6	8	1	3	0	2	1	0	1	5	0	0	0	1	0	0	2	0	1	0	0	0	1	0	0	1	1	0	0	0	0	0	1
14	35	12	5	2	6	0	8	2	20	1	0	2	3	3	3	1	3	1	0	0	2	2	0	2	2	0	0	3	3	2	2	0
11	26	10	4	0	4	3	5	0	5	1	0	2	2	2	3	1	2	1	0	0	0	1	1	1	1	2	1	2	2	1	0	0
13	33	15	3	0	7	3	3	2	10	2	2	2	3	3	3	1	1	1	0	0	0	2	2	2	1	1	2	1	1	1	2	0
8	26	12	4	5	3	0	2	0	5	2	2	2	2	2	2	1	2	1	1	2	2	2	0	0	1	0	0	0	1	1	0	0
15	19	12	0	0	0	2	5	0	10	3	1	1	1	3	3	0	0	0	0	0	0	0	0	0	0	1	1	2	0	3	0	0
12	36	14	5	1	6	5	5	0	10	2	2	3	2	3	2	2	2	1	0	0	1	2	1	1	2	2	3	2	2	1	0	0
14	32	9	6	0	7	2	5	3	15	2	1	0	2	2	2	2	2	2	0	0	0	2	1	2	2	1	1	1	2	2	2	1
14	21	9	5	0	0	1	4	2	20	1	0	2	2	3	1	2	2	1	0	0	0	0	0	0	0	1	0	1	2	1	1	1
12	32	15	1	0	5	4	5	2	20	2	3	3	3	2	2	1	0	0	0	0	0	2	0	1	2	1	3	2	1	2	2	0
15	39	13	8	0	5	1	7	5	5	2	1	2	3	3	2	3	2	3	0	0	0	0	2	1	2	0	1	2	3	2	2	3
11	24	7	8	1	3	0	3	2	5	1	1	0	2	2	1	3	3	2	0	0	1	2	0	1	0	0	0	2	0	1	0	2
9	27	12	5	2	2	1	3	2	10	2	2	2	2	2	2	2	2	1	1	0	1	1	0	1	0	0	1	1	1	1	1	1
13	23	5	6	1	6	1	3	1	20	1	0	0	2	1	1	3	1	2	0	0	1	2	1	1	2	0	1	2	0	1	0	1
8	25	10	6	0	1	2	5	1	5	2	1	1	2	2	2	2	2	2	0	0	0	1	0	0	0	1	1	1	2	2	1	0
10	27	9	4	2	3	3	3	3	25	0	1	0	3	3	2	2	2	0	0	1	1	2	0	1	0	1	2	2	0	1	2	1
13	31	12	7	3	8	0	1	0	5	1	2	2	2	2	3	3	3	1	1	0	2	2	2	2	2	0	0	0	1	0	0	0
20	28	11	5	0	4	0	6	2	10	0	0	2	3	3	3	2	3	0	0	0	0	2	0	1	1	0	0	2	2	2	2	0
15	37	15	1	2	7	3	9	0	5	3	3	3	1	3	2	0	1	0	0	0	2	2	1	2	2	2	1	3	3	3	0	0
14	19	4	5	0	5	1	4	0	10	0	0	0	1	2	1	2	2	1	0	0	0	1	1	1	2	1	0	2	1	1	0	0
15	16	6	3	0	3	0	3	1	5	1	1	1	1	1	1	1	1	1	0	0	0	1	0	1	1	0	0	1	1	1	1	0
11	19	3	6	0	6	1	3	0	5	0	0	0	1	1	1	2	3	1	0	0	0	2	2	2	0	0	1	1	2	0	0	0
15	32	16	4	1	5	1	3	2	20	2	2	3	3	3	3	1	2	1	1	0	0	1	1	1	2	0	1	1	1	1	1	1
14	26	11	7	0	2	1	5	0	10	1	0	1	3	3	3	3	3	1	0	0	0	2	0	0	0	0	1	2	2	1	0	0
9	17	8	2	0	2	3	2	0	40	1	2	2	1	1	1	1	1	0	0	0	0	1	0	0	1	2	1	0	1	1	0	0
17	32	12	5	1	9	0	2	3	750	1	2	0	3	3	3	0	3	2	0	0	1	2	3	3	1	0	0	0	0	2	3	0
6	19	6	4	2	1	2	3	1	5	1	1	1	1	1	1	1	2	1	2	0	0	1	0	0	0	1	1	1	1	1	1	0
5	16	4	1	0	1	4	4	2	2	1	0	1	0	1	1	0	1	0	0	0	0	1	0	0	0	2	2	2	1	1	1	1
8	16	8	1	0	2	1	2	2	5	1	1	1	1	2	2	0	1	0	0	0	0	1	0	1	0	1	0	1	0	1	1	1
13	24	12	0	0	4	3	5	0	10	3	1	1	3	2	2	0	0	0	0	0	0	1	1	1	1	1	2	1	2	2	0	0
12	35	10	9	0	6	2	6	2	5	1	1	1	2	2	3	3	3	3	0	0	0	2	1	2	1	1	1	2	2	2	2	0
7	23	6	9	0	1	2	4	1	10	1	0	0	1	2	2	3	3	3	0	0	0	0	1	0	0	1	1	1	1	2	1	0
9	28	13	5	1	2	1	4	2	2	2	1	1	3	3	3	2	2	1	1	0	0	1	0	0	1	1	0	2	1	1	1	1
15	31	11	4	3	5	1	5	2	250	1	1	0	3	3	3	1	2	1	2	0	1	1	0	2	2	1	0	1	2	2	2	0
11	29	6	5	0	6	6	5	1	20	0	0	0	2	2	2	1	3	1	0	0	0	2	1	2	1	3	3	1	2	2	1	0
14	31	10	6	4	4	2	4	1	10	1	1	1	2	3	2	2	3	1	0	2	2	1	1	1	1	1	1	1	1	2	1	0
14	19	6	4	0	2	2	3	2	30	1	1	1	1	1	1	1	2	1	0	0	0	1	0	0	1	1	1	1	1	1	1	1
11	16	9	2	0	1	0	2	2	20	0	0	1	2	3	3	1	1	0	0	0	0	1	0	0	0	0	0	1	0	1	2	0
10	40	15	6	2	6	4	4	3	2	2	2	2	3	3	3	2	3	1	2	0	0	2	1	2	1	2	2	1	2	1	2	1
8	29	14	4	0	4	4	3	0	20	2	2	2	3	2	3	1	2	1	0	0	0	0	1	2	1	2	2	1	1	1	0	0
11	26	8	6	0	3	2	5	2	15	0	0	0	2	3	3	3	3	0	0	0	0	2	0	1	0	1	1	2	1	2	2	0
7	29	12	5	4	0	4	4	0	3	1	1	2	2	3	3	2	3	0	1	1	2	0	0	0	0	2	2	1	1	2	0	0
6	26	7	3	0	5	5	5	1	10	1	0	2	0	1	3	2	1	0	0	0	0	2	1	1	1	2	3	1	2	2	1	0
13	18	7	6	0	4	0	1	0	3	0	1	1	3	0	2	3	3	0	0	0	0	1	1	1	1	0	0	0	0	1	0	0
16	30	11	3	1	6	2	4	3	200	2	1	2	2	2	2	1	1	1	0	0	1	1	2	2	1	1	1	1	2	1	2	1
5	15	3	4	0	2	2	2	2	5	0	0	1	1	1	0	2	2	0	0	0	0	1	0	0	1	1	1	1	1	0	2	0
12	32	12	4	1	6	2	5	2	5	2	2	1	3	2	2	1	2	1	0	0	1	1	1	2	2	1	1	2	1	2	1	1
10	27	10	4	0	4	2	6	1	5	1	1	2	2	3	1	1	2	1	0	0	0	1	0	2	1	1	1	2	2	2	1	0
14	38	13	7	1	5	2	6	4	10	2	1	2	2	3	3	3	3	1	0	0	1	2	0	2	1	1	1	2	2	2	3	1
14	32	6	8	2	4	3	9	0	5	1	0	1	1	2	1	3	3	2	1	0	1	1	0	2	1	1	2	3	3	3	0	0
12	22	12	0	0	4	0	4	2	10	2	2	1	2	2	3	0	0	0	0	0	0	1	1	1	1	0	0	2	1	1	1	1
0	0	0	0	0	0	0	0	0	0	0	0	0	0	0	0	0	0	0	0	0	0	0	0	0	0	0	0	0	0	0	0	0
14	36	9	9	1	9	2	5	1	50	1	1	1	2	2	2	3	3	3	0	0	1	2	2	2	3	1	1	2	1	2	1	0
11	27	10	6	0	5	0	5	1	2	1	0	0	3	3	3	2	2	2	0	0	0	1	1	2	1	0	0	1	2	2	1	0
14	29	11	1	3	6	0	7	1	5	3	0	0	2	3	3	0	1	0	1	0	2	2	2	2	0	0	0	2	3	2	1	0
7	19	8	1	0	2	2	3	3	0	1	1	0	1	2	3	0	1	0	0	0	0	1	0	0	1	1	1	0	3	0	1	2
15	32	13	6	0	7	2	2	2	10	1	1	2	3	3	3	1	3	2	0	0	0	1	2	3	1	0	2	0	0	2	2	0
5	25	10	3	0	0	4	8	0	20	2	0	2	3	1	2	0	3	0	0	0	0	0	0	0	0	1	3	2	3	3	0	0
11	18	9	5	0	2	0	2	0	5	1	1	1	2	2	2	2	2	1	0	0	0	0	0	1	1	0	0	0	1	1	0	0
13	16	8	1	0	2	1	4	0	10	2	1	0	2	1	2	0	1	0	0	0	0	1	0	1	0	0	1	2	1	1	0	0
8	14	4	5	0	1	0	2	2	0	0	0	0	1	2	1	2	2	1	0	0	0	0	0	0	1	0	0	1	0	1	2	0
13	31	13	5	1	2	2	7	1	67	2	2	1	3	2	3	3	1	1	1	0	0	1	0	1	0	1	1	3	2	2	0	1
13	17	8	4	0	2	0	1	2	0	0	1	1	2	2	2	2	2	0	0	0	0	2	0	0	0	0	0	0	0	1	2	0
15	32	11	5	1	4	3	6	2	20	2	1	1	3	2	2	1	3	1	0	0	1	1	0	1	2	1	2	2	2	2	2	0
10	17	10	3	0	1	1	1	1	2	3	1	0	2	2	2	0	3	0	0	0	0	1	0	0	0	1	0	0	0	1	1	0
12	39	9	8	6	5	3	6	2	4	1	0	2	2	2	2	3	3	2	2	2	2	2	0	1	2	1	2	2	2	2	2	0
3	16	4	6	0	4	0	2	0	2	0	0	0	3	0	1	3	3	0	0	0	0	2	1	0	1	0	0	0	0	2	0	0
7	16	6	7	0	0	1	2	0	3	0	0	1	1	2	2	3	2	2	0	0	0	0	0	0	0	0	1	0	1	1	0	0
12	21	11	0	0	5	0	3	2	15	1	1	2	3	2	2	0	0	0	0	0	0	2	1	2	0	0	0	1	0	2	2	0
11	18	7	0	0	4	2	5	0	15	3	1	1	0	2	0	0	0	0	0	0	0	1	1	1	1	0	2	2	2	1	0	0
11	19	9	2	0	1	2	3	2	5	2	0	1	2	2	2	1	1	0	0	0	0	1	0	0	0	1	1	1	1	1	1	1
12	18	11	0	1	2	0	3	1	1	2	0	0	3	3	3	0	0	0	1	0	0	1	0	1	0	0	0	1	0	2	1	0
8	18	5	7	0	1	2	3	0	5	1	0	0	1	1	2	3	3	1	0	0	0	1	0	0	0	1	1	1	1	1	0	0
8	26	12	8	0	1	0	4	1	0	1	3	2	3	3	0	3	3	2	0	0	0	1	0	0	0	0	0	0	2	2	1	0
5	22	8	6	1	3	0	4	0	10	0	1	2	2	2	1	3	3	0	0	0	1	1	1	1	0	0	0	1	2	1	0	0
8	12	4	3	0	3	0	2	0	15	0	0	0	1	2	1	2	0	1	0	0	0	1	1	1	0	0	0	1	0	1	0	0
15	35	13	6	0	8	2	6	0	10	1	2	2	3	3	2	2	3	1	0	0	0	3	1	2	2	1	1	2	2	2	0	0
9	17	5	7	1	2	0	2	0	4	0	1	1	2	1	0	2	3	2	0	0	1	1	0	0	1	0	0	0	2	0	0	0
18	38	13	6	2	5	1	5	6	15	1	2	1	3	3	3	1	3	2	0	0	2	0	0	3	2	0	1	1	2	2	3	3
6	25	12	1	2	5	3	2	0	3	2	3	1	3	2	1	0	1	0	2	0	0	2	1	1	1	2	1	1	0	1	0	0
10	22	11	2	0	0	2	4	3	10	2	1	2	2	2	2	0	2	0	0	0	0	0	0	0	0	1	1	1	2	1	1	2
13	35	15	7	1	5	0	6	1	15	2	2	2	3	3	3	3	3	1	0	0	1	2	0	1	2	0	0	2	2	2	1	0
12	29	9	5	2	8	0	5	0	10	1	1	0	2	2	3	1	3	1	1	0	1	2	1	3	2	0	0	1	2	2	0	0
15	43	13	9	1	7	2	6	5	5	2	1	2	3	3	2	3	3	3	1	0	0	2	1	2	2	1	1	2	2	2	3	2
14	36	15	5	2	5	1	6	2	15	3	2	2	2	3	3	1	2	2	2	0	0	1	1	1	2	1	0	2	2	2	2	0
13	24	10	4	1	4	1	2	2	10	1	2	0	1	3	3	1	2	1	0	0	1	2	0	0	2	0	1	0	1	1	2	0
10	27	8	6	0	8	0	3	2	10	1	1	0	2	3	1	3	2	1	0	0	0	2	1	2	3	0	0	2	0	1	0	2
14	26	9	7	0	5	0	4	1	10	1	1	1	2	2	2	3	3	1	0	0	0	1	1	1	2	0	0	1	2	1	1	0
11	31	10	7	0	7	2	4	1	20	1	0	0	3	3	3	3	2	2	0	0	0	1	2	2	2	1	1	0	2	2	1	0
12	30	10	7	2	5	0	6	0	5	0	0	2	2	3	3	2	3	2	0	0	2	2	1	1	1	0	0	2	3	1	0	0
11	29	13	8	0	0	0	4	4	10	1	2	2	2	3	3	3	3	2	0	0	0	0	0	0	0	0	0	1	2	1	2	2
7	17	8	5	0	1	0	3	0	1	2	0	0	2	2	2	1	3	1	0	0	0	1	0	0	0	0	0	0	1	2	0	0
20	51	14	7	9	10	2	6	3	10	2	3	0	3	3	3	3	3	1	3	3	3	2	2	3	3	1	1	2	2	2	3	0
7	23	12	5	0	2	3	1	0	5	1	1	1	3	3	3	2	2	1	0	0	0	1	0	1	0	1	2	0	1	0	0	0
4	30	14	4	4	0	0	6	2	5	2	1	2	3	3	3	2	2	0	2	0	2	0	0	0	0	0	0	2	2	2	2	0
19	38	13	5	3	8	1	7	1	40	3	2	3	1	2	2	2	2	1	0	0	3	2	2	3	1	0	1	2	3	2	1	0
13	21	10	4	2	2	1	2	0	3	1	1	2	3	1	2	1	2	1	1	0	1	2	0	0	0	0	1	1	0	1	0	0
15	24	6	5	3	2	2	6	0	5	1	0	1	0	2	2	2	2	1	1	0	2	1	0	1	0	1	1	2	2	2	0	0
10	23	7	4	1	1	3	6	1	1	0	0	1	1	3	2	1	3	0	0	0	1	0	0	0	1	1	2	2	2	2	1	0
15	40	14	4	5	5	4	7	1	120	1	2	2	3	3	3	2	1	1	2	1	2	2	0	2	1	1	3	2	2	3	0	1
18	35	9	6	0	11	3	5	1	6	1	0	0	3	2	3	2	3	1	0	0	0	3	2	3	3	1	2	1	2	2	1	0
13	28	16	0	3	6	0	2	1	10	3	1	3	3	3	3	0	0	0	1	0	2	2	1	2	1	0	0	1	1	0	0	1
5	32	14	5	0	2	4	7	0	30	2	2	3	1	3	3	3	2	0	0	0	0	1	0	0	1	2	2	2	2	3	0	0
16	26	9	9	0	3	0	4	1	25	3	0	0	1	3	2	3	3	3	0	0	0	0	1	2	0	0	0	2	1	1	1	0
9	20	8	1	1	2	3	5	0	50	2	0	1	3	1	1	1	0	0	0	0	1	1	0	0	1	1	2	2	1	2	0	0
9	29	12	6	1	3	0	5	2	4	3	3	1	1	2	2	3	3	0	0	0	1	1	0	1	1	0	0	2	2	1	2	0
15	19	6	5	0	3	1	3	1	2	1	1	1	1	1	1	2	1	2	0	0	0	0	1	1	1	0	1	1	0	2	0	1
8	18	9	3	1	3	0	1	1	30	0	0	2	2	2	3	0	2	1	1	0	0	1	0	1	1	0	0	0	1	0	0	1
11	14	3	5	0	2	0	4	0	5	0	0	1	0	1	1	1	3	1	0	0	0	0	0	1	1	0	0	2	0	2	0	0
13	18	7	1	0	1	2	3	4	10	1	0	1	1	2	2	0	1	0	0	0	0	1	0	0	0	1	1	1	1	1	2	2
11	15	4	3	0	4	0	3	1	100	1	0	0	1	1	1	1	1	1	0	0	0	1	1	1	1	0	0	1	1	1	1	0
11	14	5	1	0	4	0	2	2	10	1	0	0	1	1	2	0	1	0	0	0	0	2	0	1	1	0	0	1	0	1	2	0
11	31	13	0	5	6	0	4	3	10	3	2	0	2	3	3	0	0	0	2	1	2	3	0	2	1	0	0	2	0	2	0	3
13	26	14	0	0	3	2	3	4	4	3	3	2	2	2	2	0	0	0	0	0	0	1	0	1	1	0	2	0	2	1	2	2
10	27	10	5	2	5	0	5	0	0	1	3	2	2	2	0	2	2	1	0	0	2	2	0	2	1	0	0	2	1	2	0	0
13	32	11	8	1	2	2	7	1	5	1	1	0	3	3	3	3	3	2	0	0	1	1	0	0	1	1	1	2	2	3	1	0
19	51	16	6	7	5	4	8	5	20	2	2	3	3	3	3	2	3	1	2	3	2	1	1	1	2	2	2	2	3	3	2	3
13	27	7	7	0	4	1	7	1	5	0	0	0	2	2	3	3	3	1	0	0	0	1	0	2	1	0	1	2	2	3	1	0
3	15	5	5	1	1	0	3	0	5	2	0	0	1	1	1	1	2	2	1	0	0	1	0	0	0	0	0	1	1	1	0	0
14	30	11	8	0	6	0	5	0	20	2	0	0	3	3	3	3	3	2	0	0	0	3	0	2	1	0	0	1	2	2	0	0
6	30	12	1	2	4	5	6	0	10	3	1	1	3	2	2	0	1	0	1	0	1	1	0	1	2	2	3	2	2	2	0	0
19	40	14	4	1	11	1	6	3	20	1	3	1	3	3	3	2	2	0	0	0	1	3	3	3	2	0	1	2	2	2	3	0
17	39	14	5	3	10	0	7	0	20	2	1	2	3	3	3	2	3	0	0	0	3	2	3	2	3	0	0	2	3	2	0	0
12	19	9	4	0	2	2	2	0	4	1	1	2	1	2	2	2	1	1	0	0	0	0	0	1	1	1	1	0	1	1	0	0
13	25	8	6	0	4	1	6	0	5	1	1	1	1	2	2	2	3	1	0	0	0	1	1	1	1	0	1	2	2	2	0	0
11	37	10	7	4	4	3	7	2	20	2	1	3	1	1	2	3	3	1	1	1	2	0	1	2	1	2	1	2	2	3	1	1
17	38	16	5	3	5	2	7	0	4	2	2	3	3	3	3	1	3	1	0	1	2	1	2	2	0	0	2	2	2	3	0	0
18	39	16	2	2	9	2	8	0	25	2	2	3	3	3	3	0	2	0	0	0	2	2	2	2	3	1	1	2	3	3	0	0
17	32	11	7	0	6	0	5	3	15	2	2	2	1	1	3	3	3	1	0	0	0	2	1	1	2	0	0	1	2	2	3	0
14	34	14	7	0	6	2	4	1	5	2	1	2	3	3	3	3	2	2	0	0	0	2	2	2	0	0	2	2	1	1	0	1
8	31	14	4	2	3	2	4	2	5	3	3	1	2	3	2	1	2	1	1	0	1	1	1	1	0	1	1	1	2	1	1	1
14	37	7	5	5	9	3	5	3	10	1	1	1	2	1	1	2	2	1	3	0	2	3	2	2	2	1	2	2	2	1	2	1
8	21	9	2	1	2	0	6	1	15	1	0	1	2	3	2	1	1	0	1	0	0	1	0	0	1	0	0	2	2	2	1	0
19	49	14	8	8	10	0	6	3	40	2	2	1	3	3	3	2	3	3	3	3	2	2	3	3	2	0	0	2	2	2	2	1
15	25	9	4	0	4	1	6	1	15	1	0	0	2	3	3	1	3	0	0	0	0	1	0	2	1	0	1	2	2	2	1	0
14	21	8	3	0	2	3	3	2	20	1	2	2	1	1	1	1	1	1	0	0	0	1	0	0	1	2	1	1	1	1	1	1
15	38	10	5	3	8	1	8	3	20	2	3	2	0	2	1	1	2	2	1	1	1	0	2	3	3	1	0	2	3	3	1	2
